# Supplementary material
Source: publisher site journal article supplement (https://www.spandidos-publications.com/4608/downloadSupplementary)
Supplement: Supplementary file 1 [file downloadSupplementary]

## Sheet: Sheet 1
Table SXIII. DO analysis up specific
doid	DO_Name	URL	out (369)	All (6225)	pvalue	qvalue	Genes
DOID:65	connective tissue disease	http://www.ontobee.org/ontology/DOID?iri=http://purl.obolibrary.org/obo/DOID_65	34	262	1.01969e-05	0.0108903	AGER;AHR;BCL2;CASP3;CCL7;CCR7;COL15A1;COL1A1;COL1A2;EDN1;FAS;FASLG;FCGR3B;HBEGF;HMGA2;IL10;IL13;IL18;INSR;ITGB3;LBR;MIF;NGF;PAPPA;PDGFB;PMAIP1;PTPRF;RBFOX2;RCN1;SCN2B;SKIL;TGFBR1;THBS1;TP53
DOID:3737	verrucous carcinoma	http://www.ontobee.org/ontology/DOID?iri=http://purl.obolibrary.org/obo/DOID_3737	5	10	0.000140103	0.0362838	BCL2;CCND1;CDKN1A;RB1;TP53
DOID:13767	clonorchiasis	http://www.ontobee.org/ontology/DOID?iri=http://purl.obolibrary.org/obo/DOID_13767	3	3	0.000206696	0.0362838	CASP3;FAS;FASLG
DOID:17	musculoskeletal system disease	http://www.ontobee.org/ontology/DOID?iri=http://purl.obolibrary.org/obo/DOID_17	86	1016	0.000215114	0.0362838	ADAM15;ADAMTS5;ADRB2;ADRB3;AGER;AHR;ATP2A2;BACE2;BCL2;BCL2L1;BMP5;CASP3;CCL21;CCL7;CCND1;CCR7;CD86;CDKN1A;CLEC16A;COL15A1;COL1A1;COL1A2;COL9A1;COL9A3;CYP19A1;DMP1;EDN1;ENGASE;FAS;FASLG;FCGR3B;FKRP;GHR;HBEGF;HMGA2;HOXD10;ICOS;IGF1R;IKBKE;IL10;IL13;IL18;INSR;IRS2;ITGB3;KPNA1;KRAS;LBR;LTB;MAP3K2;MIF;MYH7;NGF;P4HA2;PAPPA;PDGFB;PMAIP1;PRDM1;PRKCZ;PTPRF;RAP1A;RB1;RBFOX2;RCN1;ROR2;RORC;RUNX1T1;S100A8;S1…
DOID:1575	rheumatic disease	http://www.ontobee.org/ontology/DOID?iri=http://purl.obolibrary.org/obo/DOID_1575	23	175	0.000237815	0.0362838	AGER;CASP3;CCL7;CCR7;COL15A1;COL1A1;COL1A2;EDN1;FAS;IL10;IL13;INSR;LBR;MIF;PDGFB;PMAIP1;PTPRF;RBFOX2;RCN1;SCN2B;SKIL;TGFBR1;THBS1
DOID:418	systemic scleroderma	http://www.ontobee.org/ontology/DOID?iri=http://purl.obolibrary.org/obo/DOID_418	23	175	0.000237815	0.0362838	AGER;CASP3;CCL7;CCR7;COL15A1;COL1A1;COL1A2;EDN1;FAS;IL10;IL13;INSR;LBR;MIF;PDGFB;PMAIP1;PTPRF;RBFOX2;RCN1;SCN2B;SKIL;TGFBR1;THBS1
DOID:419	scleroderma	http://www.ontobee.org/ontology/DOID?iri=http://purl.obolibrary.org/obo/DOID_419	23	175	0.000237815	0.0362838	AGER;CASP3;CCL7;CCR7;COL15A1;COL1A1;COL1A2;EDN1;FAS;IL10;IL13;INSR;LBR;MIF;PDGFB;PMAIP1;PTPRF;RBFOX2;RCN1;SCN2B;SKIL;TGFBR1;THBS1
DOID:4440	seminoma	http://www.ontobee.org/ontology/DOID?iri=http://purl.obolibrary.org/obo/DOID_4440	7	24	0.000348653	0.0465452	BCL2;FAS;FASLG;RB1;SOX2;TP53;YBX2
DOID:854	collagen disease	http://www.ontobee.org/ontology/DOID?iri=http://purl.obolibrary.org/obo/DOID_854	23	186	0.000579501	0.0687675	AGER;CASP3;CCL7;CCR7;COL15A1;COL1A1;COL1A2;EDN1;FAS;IL10;IL13;INSR;LBR;MIF;PDGFB;PMAIP1;PTPRF;RBFOX2;RCN1;SCN2B;SKIL;TGFBR1;THBS1
DOID:4943	adenocarcinoma in situ	http://www.ontobee.org/ontology/DOID?iri=http://purl.obolibrary.org/obo/DOID_4943	3	4	0.000790307	0.0844048	CCND1;IGF2BP3;KRAS
DOID:417	hypersensitivity reaction type II disease	http://www.ontobee.org/ontology/DOID?iri=http://purl.obolibrary.org/obo/DOID_417	48	515	0.000916883	0.0863924	ADRB2;AGER;ATG16L1;BCL2;BCL2L1;CASP3;CCL21;CCL7;CCR7;CDKN1A;CHUK;CLEC16A;COL15A1;COL1A1;COL1A2;EDN1;FAS;FASLG;FCGR3B;ICOS;IGF1R;IL10;IL13;IL18;INSR;ITGB3;LBR;MIF;NGF;PAPPA;PBX3;PDGFB;PMAIP1;PSMB8;PTPRF;RBFOX2;RCN1;S100A8;SCN2B;SKIL;ST3GAL1;TAB2;TGFBR1;THBS1;TNFRSF1B;TNFSF9;TP53;TXLNA
DOID:3304	germinoma	http://www.ontobee.org/ontology/DOID?iri=http://purl.obolibrary.org/obo/DOID_3304	7	28	0.000970701	0.0863924	BCL2;FAS;FASLG;RB1;SOX2;TP53;YBX2
DOID:3910	lung adenocarcinoma	http://www.ontobee.org/ontology/DOID?iri=http://purl.obolibrary.org/obo/DOID_3910	20	160	0.00114279	0.0916798	ADAM12;ADRB2;AGER;AHR;BCL2L1;CCR7;CRMP1;DUSP4;IGF1R;IL13;KRAS;MIF;NRAS;RRM2;S100A2;S100A8;SCD;SOX9;TP53;TP73
DOID:12361	Graves' disease	http://www.ontobee.org/ontology/DOID?iri=http://purl.obolibrary.org/obo/DOID_12361	12	74	0.00121837	0.0916798	ADRB2;BCL2;EDN1;FAS;FASLG;IGF1R;IL10;IL13;ST3GAL1;TAB2;TNFRSF1B;TP53
DOID:50	thyroid gland disease	http://www.ontobee.org/ontology/DOID?iri=http://purl.obolibrary.org/obo/DOID_50	19	150	0.00128764	0.0916798	ADRB2;BCL2;BCL2L1;CCND1;COL1A1;EDN1;FAS;FASLG;IGF1R;IL10;IL13;IL18;KRAS;NRAS;ST3GAL1;TAB2;THRA;TNFRSF1B;TP53
DOID:3093	nervous system cancer	http://www.ontobee.org/ontology/DOID?iri=http://purl.obolibrary.org/obo/DOID_3093	46	504	0.00181876	0.11074	AGER;AIFM1;ARL4D;ATF2;BCL2;BCL2L1;BMP5;BTG2;CASP3;CCND1;CDK6;CDKN1A;CHEK2;COL1A2;CXCR5;CYP19A1;DAPK1;DKK3;DUSP1;GAS7;GTF2I;HMGA1;HMGA2;HOXC11;ICMT;IGF1R;LYVE1;MDM4;MMP11;MYCN;PDGFB;PHOX2B;PMAIP1;PTAFR;RAP1GDS1;RB1;SFN;SOX9;SYT1;TARDBP;TLX2;TP53;TP73;VSNL1;YWHAH;YWHAZ
DOID:1229	paranoid schizophrenia	http://www.ontobee.org/ontology/DOID?iri=http://purl.obolibrary.org/obo/DOID_1229	4	10	0.00191626	0.11074	AGER;IL10;TNFRSF1B;YWHAZ
DOID:14256	adult-onset Still's disease	http://www.ontobee.org/ontology/DOID?iri=http://purl.obolibrary.org/obo/DOID_14256	4	10	0.00191626	0.11074	FAS;FASLG;IL18;MIF
DOID:1936	atherosclerosis	http://www.ontobee.org/ontology/DOID?iri=http://purl.obolibrary.org/obo/DOID_1936	31	306	0.00215189	0.11074	ADAM15;ADIPOR2;ADRB2;AGER;AHR;ARG2;CASP3;CD86;CYP19A1;EDN1;FASLG;HAS2;HBEGF;ICOS;IGF1R;IL10;IL18;ITGB3;MIF;NGF;OLR1;PAPPA;PDGFB;PLA2G3;PRKCZ;S100A8;SCD;SOCS1;TP53;YWHAZ;ZNF202
DOID:2348	arteriosclerotic cardiovascular disease	http://www.ontobee.org/ontology/DOID?iri=http://purl.obolibrary.org/obo/DOID_2348	31	307	0.00226517	0.11074	ADAM15;ADIPOR2;ADRB2;AGER;AHR;ARG2;CASP3;CD86;CYP19A1;EDN1;FASLG;HAS2;HBEGF;ICOS;IGF1R;IL10;IL18;ITGB3;MIF;NGF;OLR1;PAPPA;PDGFB;PLA2G3;PRKCZ;S100A8;SCD;SOCS1;TP53;YWHAZ;ZNF202
DOID:201	connective tissue cancer	http://www.ontobee.org/ontology/DOID?iri=http://purl.obolibrary.org/obo/DOID_201	35	360	0.00229826	0.11074	ADIPOR2;ATP2A2;BCL2;BCL2L1;CASP3;CCND1;CDH5;CDKN1A;COL1A1;CRK;DKK3;DUSP1;FAS;HAS2;HBEGF;HDAC4;HMGA2;IGF1R;IGF2BP2;IGF2BP3;IL13;ITGB3;MYCN;NRAS;PDGFB;PIAS4;RB1;ROR2;SMO;SOX2;SOX9;TGFBR1;TP53;TP73;YY1
DOID:7998	hyperthyroidism	http://www.ontobee.org/ontology/DOID?iri=http://purl.obolibrary.org/obo/DOID_7998	13	90	0.00229882	0.11074	ADRB2;BCL2;EDN1;FAS;FASLG;IGF1R;IL10;IL13;ST3GAL1;TAB2;THRA;TNFRSF1B;TP53
DOID:0060005	autoimmune disease of endocrine system	http://www.ontobee.org/ontology/DOID?iri=http://purl.obolibrary.org/obo/DOID_0060005	12	80	0.00242684	0.11074	ADRB2;BCL2;EDN1;FAS;FASLG;IGF1R;IL10;IL13;ST3GAL1;TAB2;TNFRSF1B;TP53
DOID:3748	esophagus squamous cell carcinoma	http://www.ontobee.org/ontology/DOID?iri=http://purl.obolibrary.org/obo/DOID_3748	10	60	0.00248855	0.11074	BCL2;CCND1;CDKN1A;FAS;IL10;IL18;KRAS;PBX1;S100A8;TP53
DOID:2978	carbohydrate metabolic disorder	http://www.ontobee.org/ontology/DOID?iri=http://purl.obolibrary.org/obo/DOID_2978	6	25	0.00281404	0.113791	GALE;GNPTAB;IGF1R;IL10;KCNJ3;TGFBR3
DOID:3507	dermatofibrosarcoma protuberans	http://www.ontobee.org/ontology/DOID?iri=http://purl.obolibrary.org/obo/DOID_3507	4	11	0.0028716	0.113791	COL1A1;PDGFB;SOX2;TP53
DOID:0080001	bone disease	http://www.ontobee.org/ontology/DOID?iri=http://purl.obolibrary.org/obo/DOID_0080001	63	762	0.00317426	0.113791	ADAM15;ADAMTS5;ADRB2;ADRB3;AGER;BCL2;BCL2L1;BMP5;CCL21;CCL7;CCND1;CCR7;CD86;CDKN1A;CLEC16A;COL1A1;COL1A2;COL9A1;CYP19A1;DMP1;EDN1;ENGASE;FAS;FASLG;FCGR3B;GHR;HOXD10;ICOS;IGF1R;IKBKE;IL10;IL13;IL18;IRS2;ITGB3;KPNA1;KRAS;LTB;MAP3K2;MIF;NGF;P4HA2;PDGFB;PRDM1;PRKCZ;RAP1A;RB1;ROR2;RORC;RUNX1T1;S100A8;S1PR2;SEMA3C;SOCS1;SOX9;TAB2;TGFBR3;THBS1;TNFRSF1B;TNFSF9;TP53;USP6;VAV3
DOID:9007	sudden infant death syndrome	http://www.ontobee.org/ontology/DOID?iri=http://purl.obolibrary.org/obo/DOID_9007	5	18	0.00320872	0.113791	CASP3;IL10;KCNQ4;PHOX2B;SCN5A
DOID:13317	hyperinsulinemic hypoglycemia	http://www.ontobee.org/ontology/DOID?iri=http://purl.obolibrary.org/obo/DOID_13317	2	2	0.00350482	0.113791	IGF1R;TGFBR3
DOID:6425	eyelid carcinoma	http://www.ontobee.org/ontology/DOID?iri=http://purl.obolibrary.org/obo/DOID_6425	2	2	0.00350482	0.113791	CDKN1A;TP53
DOID:9111	cutaneous leishmaniasis	http://www.ontobee.org/ontology/DOID?iri=http://purl.obolibrary.org/obo/DOID_9111	2	2	0.00350482	0.113791	FAS;FASLG
DOID:5656	cranial nerve disease	http://www.ontobee.org/ontology/DOID?iri=http://purl.obolibrary.org/obo/DOID_5656	9	53	0.00355155	0.113791	BCL2;CASP3;HOXA1;ITGB3;MMP11;PHOX2B;PLXND1;SLC25A4;TP53
DOID:2349	arteriosclerosis	http://www.ontobee.org/ontology/DOID?iri=http://purl.obolibrary.org/obo/DOID_2349	31	317	0.00371031	0.113791	ADAM15;ADIPOR2;ADRB2;AGER;AHR;ARG2;CASP3;CD86;CYP19A1;EDN1;FASLG;HAS2;HBEGF;ICOS;IGF1R;IL10;IL18;ITGB3;MIF;NGF;OLR1;PAPPA;PDGFB;PLA2G3;PRKCZ;S100A8;SCD;SOCS1;TP53;YWHAZ;ZNF202
DOID:3070	malignant glioma	http://www.ontobee.org/ontology/DOID?iri=http://purl.obolibrary.org/obo/DOID_3070	21	189	0.00378111	0.113791	BCL2;BCL2L1;CASP3;CCND1;CDKN1A;CDKN2D;FAS;FASLG;IDH2;IGF1R;KCNMB1;KRAS;LRIG2;MDM4;MIF;PDGFB;RB1;SEMA3C;TP53;TSC1;VSNL1
DOID:0050622	reproductive organ benign neoplasm	http://www.ontobee.org/ontology/DOID?iri=http://purl.obolibrary.org/obo/DOID_0050622	8	44	0.00381081	0.113791	BCL2;CCND1;COL1A1;CYP19A1;HMGA2;IGF1R;SOX9;TP53
DOID:883	parasitic helminthiasis infectious disease	http://www.ontobee.org/ontology/DOID?iri=http://purl.obolibrary.org/obo/DOID_883	7	35	0.00385144	0.113791	BCL2;CASP3;EDN1;FAS;FASLG;IL10;IL13
DOID:0060100	musculoskeletal system cancer	http://www.ontobee.org/ontology/DOID?iri=http://purl.obolibrary.org/obo/DOID_0060100	39	427	0.004011	0.113791	ADIPOR2;AGER;ATP2A2;BCL2;BCL2L1;CASP3;CCND1;CDH5;CDKN1A;COL1A1;CRK;DKK3;DUSP1;EPHA3;FAS;FBN2;HAS2;HBEGF;HDAC4;HMGA2;IGF1R;IGF2BP2;IGF2BP3;IL13;ITGB3;KRAS;MYCN;NRAS;PDGFB;PIAS4;RB1;ROR2;SMO;SOX2;SOX9;TGFBR1;TP53;TP73;YY1
DOID:2913	acute pancreatitis	http://www.ontobee.org/ontology/DOID?iri=http://purl.obolibrary.org/obo/DOID_2913	4	12	0.00410804	0.113791	HSF1;IL10;IL18;MIF
DOID:633	myositis	http://www.ontobee.org/ontology/DOID?iri=http://purl.obolibrary.org/obo/DOID_633	11	75	0.00434181	0.113791	ADRB2;ADRB3;AGER;BACE2;CCL21;FAS;IL10;S100A8;TARDBP;THBS1;USP6
DOID:1324	lung cancer	http://www.ontobee.org/ontology/DOID?iri=http://purl.obolibrary.org/obo/DOID_1324	47	541	0.0043502	0.113791	ADAM12;ADAM15;ADAMTS8;ADRB2;AGER;AHR;AIFM1;ARG2;BCL2;BCL2L1;CASP3;CASP5;CCND1;CCR7;CDKN1A;CHFR;CRMP1;DAPK1;DUSP4;FAS;FASLG;IGF1R;IGF2BP3;IL10;IL13;ITGB3;KCNJ3;KRAS;MAP3K1;MIF;MYCN;NRAS;PDGFB;RAP1GDS1;RB1;ROR2;RRM2;S100A2;S100A8;SCD;SOX9;TGFBR3;TP53;TP73;UBE2I;VSNL1;YY1
DOID:1115	sarcoma	http://www.ontobee.org/ontology/DOID?iri=http://purl.obolibrary.org/obo/DOID_1115	20	179	0.00437678	0.113791	BCL2;CCND1;CD86;CDC25A;CDK6;CDKN1A;CRK;FZD3;HBEGF;IGF1R;LYVE1;MDM4;MYCN;PDGFB;PIAS4;RB1;SOX2;TARDBP;THBS1;TP53
DOID:0050615	respiratory system cancer	http://www.ontobee.org/ontology/DOID?iri=http://purl.obolibrary.org/obo/DOID_0050615	48	556	0.00447493	0.113791	ADAM12;ADAM15;ADAMTS8;ADRB2;AGER;AHR;AIFM1;ARG2;BCAT1;BCL2;BCL2L1;CASP3;CASP5;CCND1;CCR7;CDKN1A;CHFR;CRMP1;DAPK1;DUSP4;FAS;FASLG;IGF1R;IGF2BP3;IL10;IL13;ITGB3;KCNJ3;KRAS;MAP3K1;MIF;MYCN;NRAS;PDGFB;RAP1GDS1;RB1;ROR2;RRM2;S100A2;S100A8;SCD;SOX9;TGFBR3;TP53;TP73;UBE2I;VSNL1;YY1
DOID:3953	adrenal gland cancer	http://www.ontobee.org/ontology/DOID?iri=http://purl.obolibrary.org/obo/DOID_3953	5	20	0.00526416	0.130747	BMP5;CCND1;FAS;HBEGF;TP53
DOID:8398	osteoarthritis	http://www.ontobee.org/ontology/DOID?iri=http://purl.obolibrary.org/obo/DOID_8398	19	171	0.00575088	0.137784	ADAM15;ADAMTS5;AGER;BCL2L1;BMP5;CCL21;COL1A1;CYP19A1;EDN1;FAS;FASLG;GHR;IKBKE;IL10;P4HA2;PRKCZ;SOX9;TGFBR3;TNFRSF1B
DOID:7608	parathyroid adenoma	http://www.ontobee.org/ontology/DOID?iri=http://purl.obolibrary.org/obo/DOID_7608	3	7	0.0060447	0.137784	BCL2;CCND1;SNAP23
DOID:768	retinoblastoma	http://www.ontobee.org/ontology/DOID?iri=http://purl.obolibrary.org/obo/DOID_768	14	112	0.0061023	0.137784	CASP3;CCND1;CDK6;CDKN1A;CHEK2;DAPK1;GTF2I;HMGA2;MDM4;MYCN;RB1;TARDBP;TP53;TP73
DOID:771	retinal cell cancer	http://www.ontobee.org/ontology/DOID?iri=http://purl.obolibrary.org/obo/DOID_771	14	112	0.0061023	0.137784	CASP3;CCND1;CDK6;CDKN1A;CHEK2;DAPK1;GTF2I;HMGA2;MDM4;MYCN;RB1;TARDBP;TP53;TP73
DOID:9351	diabetes mellitus	http://www.ontobee.org/ontology/DOID?iri=http://purl.obolibrary.org/obo/DOID_9351	48	566	0.00629318	0.137784	ADIPOR2;ADRB2;ADRB3;AGER;ATP2A2;CHEK2;CLEC16A;ENGASE;FAS;FASLG;ICOS;IGF2BP2;IGF2BP3;IL10;IL13;IL18;INSR;IRS2;ISL1;ITGB3;KCNMB1;KRAS;MAP3K1;MIF;MSN;OLR1;P2RX1;PBX1;PDX1;PKN2;PRKAA2;PRKAB2;PRKCZ;PTPRF;RB1;RDX;RORC;S100A8;SCD;SH2B3;SNAP23;SOCS1;SOX2;TAB2;TGFBR1;TNFRSF1B;TP53;TSC1
DOID:127	leiomyoma	http://www.ontobee.org/ontology/DOID?iri=http://purl.obolibrary.org/obo/DOID_127	12	90	0.00647531	0.137784	BCL2;CCND1;CDKN1A;COL1A1;COL4A6;CYP19A1;DAPK1;HMGA2;IGF1R;KRAS;OPN3;TP53
DOID:2316	brain ischemia	http://www.ontobee.org/ontology/DOID?iri=http://purl.obolibrary.org/obo/DOID_2316	5	21	0.00657956	0.137784	BCL2;FAS;IGF1R;KCNK10;MOCS2
DOID:6741	bilateral breast cancer	http://www.ontobee.org/ontology/DOID?iri=http://purl.obolibrary.org/obo/DOID_6741	5	21	0.00657956	0.137784	CHEK2;RB1;SOX2;TP53;ZFHX4
DOID:2914	immune system disease	http://www.ontobee.org/ontology/DOID?iri=http://purl.obolibrary.org/obo/DOID_2914	76	983	0.00683336	0.13918	ACSL6;ADAM12;ADRB2;AGER;AHR;ATG16L1;ATP2A2;BCL2;BCL2L1;CASP3;CCL21;CCL7;CCND1;CCR7;CD86;CDKN1A;CEBPD;CHD7;CHUK;CLEC16A;COL15A1;COL1A1;COL1A2;DUSP1;EDN1;ERCC4;FAS;FASLG;FCGR3B;HIF3A;HMGA2;ICOS;IDH2;IGF1R;IL10;IL13;IL18;IL25;INSR;ITGB3;KRAS;LBR;MIF;MMP11;MSN;NGF;NRAS;PAPPA;PBX3;PDGFB;PIGA;PMAIP1;PRM2;PSMB8;PTPRF;RAG1;RBFOX2;RCN1;S100A8;SCN2B;SH2B3;SKIL;SNF8;SOCS1;SRSF6;ST3GAL1;TAB2;TBX1;TGFBR1;THBS…
DOID:4645	retinal cancer	http://www.ontobee.org/ontology/DOID?iri=http://purl.obolibrary.org/obo/DOID_4645	14	114	0.00713275	0.13918	CASP3;CCND1;CDK6;CDKN1A;CHEK2;DAPK1;GTF2I;HMGA2;MDM4;MYCN;RB1;TARDBP;TP53;TP73
DOID:1749	squamous cell carcinoma	http://www.ontobee.org/ontology/DOID?iri=http://purl.obolibrary.org/obo/DOID_1749	53	643	0.00730541	0.13918	AGER;AIFM1;ATF2;ATP2A2;BCL2;BCL2L1;CASP3;CCL7;CCND1;CCR7;CDK6;CDKN1A;CHEK2;CHFR;COL4A6;CRK;DAPK1;DKK3;DMP1;EDN1;ERCC4;FAS;FBN2;HBEGF;IGF1R;IKBKE;IL10;IL13;IL18;INPP5A;KRAS;LIMD1;MDM4;MIF;MSN;PBX1;PBX2;PSMB8;RAP1A;RASSF2;RB1;S100A2;S100A8;SENP5;SFN;SKIL;SOX2;THBS1;TNFRSF1B;TP53;TP73;TSC1;WASL
DOID:423	myopathy	http://www.ontobee.org/ontology/DOID?iri=http://purl.obolibrary.org/obo/DOID_423	22	213	0.00735364	0.13918	ADRB2;ADRB3;AGER;ATP2A2;BACE2;BCL2;CCL21;CDKN1A;COL9A1;COL9A3;FAS;FKRP;IL10;INSR;MYH7;PRKCZ;S100A8;SLC25A4;SYNCRIP;TARDBP;THBS1;USP6
DOID:66	muscle tissue disease	http://www.ontobee.org/ontology/DOID?iri=http://purl.obolibrary.org/obo/DOID_66	22	213	0.00735364	0.13918	ADRB2;ADRB3;AGER;ATP2A2;BACE2;BCL2;CCL21;CDKN1A;COL9A1;COL9A3;FAS;FKRP;IL10;INSR;MYH7;PRKCZ;S100A8;SLC25A4;SYNCRIP;TARDBP;THBS1;USP6
DOID:4961	bone marrow disease	http://www.ontobee.org/ontology/DOID?iri=http://purl.obolibrary.org/obo/DOID_4961	13	103	0.00746656	0.13918	ACSL6;BCL2L1;EDN1;FASLG;HMGA2;IDH2;IL10;ITGB3;MSN;PIGA;PRM2;SH2B3;TP53
DOID:3149	keratoacanthoma	http://www.ontobee.org/ontology/DOID?iri=http://purl.obolibrary.org/obo/DOID_3149	4	14	0.00755849	0.13918	BCL2L1;CCND1;THBS1;TP53
DOID:3565	meningioma	http://www.ontobee.org/ontology/DOID?iri=http://purl.obolibrary.org/obo/DOID_3565	10	70	0.00773689	0.139788	BCL2;CCND1;CDKN1A;MMP11;RB1;SFN;TP53;TP73;YWHAH;YWHAZ
DOID:0060095	uterine benign neoplasm	http://www.ontobee.org/ontology/DOID?iri=http://purl.obolibrary.org/obo/DOID_0060095	7	40	0.00827766	0.139788	BCL2;CCND1;COL1A1;CYP19A1;HMGA2;IGF1R;TP53
DOID:13223	uterine fibroid	http://www.ontobee.org/ontology/DOID?iri=http://purl.obolibrary.org/obo/DOID_13223	7	40	0.00827766	0.139788	BCL2;CCND1;COL1A1;CYP19A1;HMGA2;IGF1R;TP53
DOID:8432	polycythemia	http://www.ontobee.org/ontology/DOID?iri=http://purl.obolibrary.org/obo/DOID_8432	7	40	0.00827766	0.139788	ACSL6;BCL2L1;EDN1;HMGA2;IDH2;PRM2;SH2B3
DOID:848	arthritis	http://www.ontobee.org/ontology/DOID?iri=http://purl.obolibrary.org/obo/DOID_848	50	604	0.00843582	0.139788	ADAM15;ADAMTS5;ADRB2;ADRB3;AGER;BCL2;BCL2L1;BMP5;CCL21;CCL7;CCR7;CD86;CDKN1A;CLEC16A;COL1A1;CYP19A1;EDN1;ENGASE;FAS;FASLG;FCGR3B;GHR;ICOS;IKBKE;IL10;IL13;IL18;KPNA1;LTB;MAP3K2;MIF;NGF;P4HA2;PRDM1;PRKCZ;RAP1A;RB1;RORC;RUNX1T1;S100A8;S1PR2;SEMA3C;SOCS1;SOX9;TAB2;TGFBR3;THBS1;TNFRSF1B;TNFSF9;TP53
DOID:6000	congestive heart failure	http://www.ontobee.org/ontology/DOID?iri=http://purl.obolibrary.org/obo/DOID_6000	21	203	0.00857513	0.139788	ADRB1;ADRB2;ADRB3;AGER;ATP2A2;DUSP1;DYRK1A;EDN1;FCGR3B;FRMD4B;GATM;HDAC4;IL10;IL18;MYH7;SCN5A;TBX5;THBS1;TP53;UNC93B1;YY1
DOID:305	carcinoma	http://www.ontobee.org/ontology/DOID?iri=http://purl.obolibrary.org/obo/DOID_305	62	782	0.00876357	0.139788	AGER;AIFM1;ATF2;ATP2A2;BCL2;BCL2L1;BZW1;CASP3;CCL7;CCND1;CCR7;CD86;CDK6;CDKN1A;CHEK2;CHFR;COL4A6;CRK;DAPK1;DKK3;DMP1;EDN1;ERCC4;FAS;FASLG;FBN2;HBEGF;HMGA2;IGF1R;IGF2BP3;IKBKE;IL10;IL13;IL18;INPP5A;ITGB3;KLK10;KRAS;LIMD1;MDM4;MIF;MMP11;MSN;NGF;PBX1;PBX2;PSMB8;RAP1A;RASSF2;RB1;S100A2;S100A8;SENP5;SFN;SKIL;SOX2;THBS1;TNFRSF1B;TP53;TP73;TSC1;WASL
DOID:1659	supratentorial cancer	http://www.ontobee.org/ontology/DOID?iri=http://purl.obolibrary.org/obo/DOID_1659	3	8	0.00924995	0.139788	COL1A2;MYCN;TP53
DOID:9065	leishmaniasis	http://www.ontobee.org/ontology/DOID?iri=http://purl.obolibrary.org/obo/DOID_9065	3	8	0.00924995	0.139788	FAS;FASLG;IL10
DOID:28	endocrine system disease	http://www.ontobee.org/ontology/DOID?iri=http://purl.obolibrary.org/obo/DOID_28	32	352	0.00949154	0.139788	ADRB2;AGER;BCL2;BCL2L1;CCND1;CDKN1A;CHD7;CLEC16A;COL1A1;CYP19A1;EDN1;FAS;FASLG;GHR;HSF1;IGF1R;IL10;IL13;IL18;INSR;IRS2;KRAS;MIF;NRAS;PDGFB;PPP3CA;PRKCZ;ST3GAL1;TAB2;THRA;TNFRSF1B;TP53
DOID:5517	stomach carcinoma	http://www.ontobee.org/ontology/DOID?iri=http://purl.obolibrary.org/obo/DOID_5517	16	142	0.00951343	0.139788	BCL2;CASP3;CCND1;CDKN1A;COL1A2;FASLG;IGF1R;IL10;IL18;ITGB3;MIF;PBX2;RB1;S100A2;S100A8;TP53
DOID:3948	adrenocortical carcinoma	http://www.ontobee.org/ontology/DOID?iri=http://purl.obolibrary.org/obo/DOID_3948	4	15	0.00983303	0.139788	BMP5;CCND1;HBEGF;TP53
DOID:13501	Mobius syndrome	http://www.ontobee.org/ontology/DOID?iri=http://purl.obolibrary.org/obo/DOID_13501	2	3	0.0101011	0.139788	HOXA1;PLXND1
DOID:1756	facial nerve disease	http://www.ontobee.org/ontology/DOID?iri=http://purl.obolibrary.org/obo/DOID_1756	2	3	0.0101011	0.139788	HOXA1;PLXND1
DOID:4154	dentinogenesis imperfecta	http://www.ontobee.org/ontology/DOID?iri=http://purl.obolibrary.org/obo/DOID_4154	2	3	0.0101011	0.139788	COL1A1;COL1A2
DOID:4839	sebaceous adenocarcinoma	http://www.ontobee.org/ontology/DOID?iri=http://purl.obolibrary.org/obo/DOID_4839	2	3	0.0101011	0.139788	CDKN1A;TP53
DOID:4840	sebaceous carcinoma	http://www.ontobee.org/ontology/DOID?iri=http://purl.obolibrary.org/obo/DOID_4840	2	3	0.0101011	0.139788	CDKN1A;TP53
DOID:9598	fasciitis	http://www.ontobee.org/ontology/DOID?iri=http://purl.obolibrary.org/obo/DOID_9598	2	3	0.0101011	0.139788	AHR;HMGA2
DOID:0060056	hypersensitivity reaction disease	http://www.ontobee.org/ontology/DOID?iri=http://purl.obolibrary.org/obo/DOID_0060056	50	611	0.0104451	0.139788	ADRB2;AGER;AHR;ATG16L1;BCL2;BCL2L1;CASP3;CCL21;CCL7;CCR7;CD86;CDKN1A;CHUK;CLEC16A;COL15A1;COL1A1;COL1A2;EDN1;FAS;FASLG;FCGR3B;ICOS;IGF1R;IL10;IL13;IL18;INSR;ITGB3;LBR;MIF;NGF;PAPPA;PBX3;PDGFB;PMAIP1;PSMB8;PTPRF;RBFOX2;RCN1;S100A8;SCN2B;SKIL;ST3GAL1;TAB2;TGFBR1;THBS1;TNFRSF1B;TNFSF9;TP53;TXLNA
DOID:326	ischemia	http://www.ontobee.org/ontology/DOID?iri=http://purl.obolibrary.org/obo/DOID_326	20	194	0.0105599	0.139788	ADRB1;ADRB2;AGER;AIFM1;ATP2A2;BCL2;BCL2L1;CASP3;COL1A1;EDN1;ESRRG;FAS;FASLG;HBEGF;IGF1R;IL10;KCNK10;MOCS2;SCN5A;THBS1
DOID:1067	open-angle glaucoma	http://www.ontobee.org/ontology/DOID?iri=http://purl.obolibrary.org/obo/DOID_1067	8	52	0.0107134	0.139788	ADRB1;ADRB2;CDKN1A;CYP46A1;FAS;FASLG;TP53;VAV3
DOID:4045	muscle cancer	http://www.ontobee.org/ontology/DOID?iri=http://purl.obolibrary.org/obo/DOID_4045	12	96	0.0107397	0.139788	AGER;BCL2;BCL2L1;CCND1;CDKN1A;EPHA3;FBN2;HMGA2;IGF1R;KRAS;RB1;TP53
DOID:0060086	female reproductive organ benign neoplasm	http://www.ontobee.org/ontology/DOID?iri=http://purl.obolibrary.org/obo/DOID_0060086	7	42	0.0108224	0.139788	BCL2;CCND1;COL1A1;CYP19A1;HMGA2;IGF1R;TP53
DOID:3602	toxic encephalopathy	http://www.ontobee.org/ontology/DOID?iri=http://purl.obolibrary.org/obo/DOID_3602	7	42	0.0108224	0.139788	BCL2;BCL2L1;FAS;GLRX;KCNN3;PDGFB;TARDBP
DOID:0050736	autosomal dominant disease	http://www.ontobee.org/ontology/DOID?iri=http://purl.obolibrary.org/obo/DOID_0050736	27	287	0.0108636	0.139788	AHR;BCL2;CCND1;CDKN1A;CHEK2;COL1A1;CYP19A1;E2F6;ERCC4;FBN2;GTF2I;HMGA2;IGF1R;ITGB3;KRAS;MAP3K1;MYH7;NRAS;RB1;SMC1A;SMO;TGFBR1;TP53;TP73;TSC1;UBE2I;USP6
DOID:0050013	carbohydrate metabolism disease	http://www.ontobee.org/ontology/DOID?iri=http://purl.obolibrary.org/obo/DOID_0050013	50	616	0.0121133	0.148856	ADIPOR2;ADRB2;ADRB3;AGER;ATP2A2;CHEK2;CLEC16A;EDN1;ENGASE;FAS;FASLG;ICOS;IGF2BP2;IGF2BP3;IL10;IL13;IL18;INSR;IRS2;ISL1;ITGB3;KCNMB1;KRAS;MAP3K1;MIF;MSN;OLR1;P2RX1;PBX1;PDX1;PKN2;PRKAA2;PRKAB2;PRKCZ;PTPRF;RB1;RDX;RORC;S100A8;SCD;SH2B3;SMO;SNAP23;SOCS1;SOX2;TAB2;TGFBR1;TNFRSF1B;TP53;TSC1
DOID:4194	glucose metabolism disease	http://www.ontobee.org/ontology/DOID?iri=http://purl.obolibrary.org/obo/DOID_4194	50	616	0.0121133	0.148856	ADIPOR2;ADRB2;ADRB3;AGER;ATP2A2;CHEK2;CLEC16A;EDN1;ENGASE;FAS;FASLG;ICOS;IGF2BP2;IGF2BP3;IL10;IL13;IL18;INSR;IRS2;ISL1;ITGB3;KCNMB1;KRAS;MAP3K1;MIF;MSN;OLR1;P2RX1;PBX1;PDX1;PKN2;PRKAA2;PRKAB2;PRKCZ;PTPRF;RB1;RDX;RORC;S100A8;SCD;SH2B3;SMO;SNAP23;SOCS1;SOX2;TAB2;TGFBR1;TNFRSF1B;TP53;TSC1
DOID:12894	Sjogren's syndrome	http://www.ontobee.org/ontology/DOID?iri=http://purl.obolibrary.org/obo/DOID_12894	9	64	0.0124497	0.148856	AGER;CCR7;FAS;FASLG;IL10;IL18;NGF;TNFRSF1B;TXLNA
DOID:3068	glioblastoma multiforme	http://www.ontobee.org/ontology/DOID?iri=http://purl.obolibrary.org/obo/DOID_3068	9	64	0.0124497	0.148856	BCL2;CASP3;CCND1;CDKN1A;FAS;IGF1R;KRAS;MIF;RB1
DOID:8719	in situ carcinoma	http://www.ontobee.org/ontology/DOID?iri=http://purl.obolibrary.org/obo/DOID_8719	4	16	0.0125091	0.148856	CCND1;CDKN1A;IGF2BP3;KRAS
DOID:0060116	sensory system cancer	http://www.ontobee.org/ontology/DOID?iri=http://purl.obolibrary.org/obo/DOID_0060116	15	134	0.012544	0.148856	BCL2;CASP3;CCND1;CDK6;CDKN1A;CHEK2;DAPK1;GTF2I;HMGA2;MDM4;MYCN;RB1;TARDBP;TP53;TP73
DOID:2174	ocular cancer	http://www.ontobee.org/ontology/DOID?iri=http://purl.obolibrary.org/obo/DOID_2174	15	134	0.012544	0.148856	BCL2;CASP3;CCND1;CDK6;CDKN1A;CHEK2;DAPK1;GTF2I;HMGA2;MDM4;MYCN;RB1;TARDBP;TP53;TP73
DOID:10908	hydrocephalus	http://www.ontobee.org/ontology/DOID?iri=http://purl.obolibrary.org/obo/DOID_10908	3	9	0.013272	0.15188	CASP3;FAS;FASLG
DOID:13949	interstitial cystitis	http://www.ontobee.org/ontology/DOID?iri=http://purl.obolibrary.org/obo/DOID_13949	3	9	0.013272	0.15188	HBEGF;NGF;TP53
DOID:1678	chronic interstitial cystitis	http://www.ontobee.org/ontology/DOID?iri=http://purl.obolibrary.org/obo/DOID_1678	3	9	0.013272	0.15188	HBEGF;NGF;TP53
DOID:4029	gastritis	http://www.ontobee.org/ontology/DOID?iri=http://purl.obolibrary.org/obo/DOID_4029	8	54	0.0133677	0.15188	FAS;FASLG;IL10;MIF;PDX1;RB1;TP53;TP73
DOID:0080000	muscular disease	http://www.ontobee.org/ontology/DOID?iri=http://purl.obolibrary.org/obo/DOID_0080000	22	225	0.0135727	0.152175	ADRB2;ADRB3;AGER;ATP2A2;BACE2;BCL2;CCL21;CDKN1A;COL9A1;COL9A3;FAS;FKRP;IL10;INSR;MYH7;PRKCZ;S100A8;SLC25A4;SYNCRIP;TARDBP;THBS1;USP6
DOID:3620	central nervous system cancer	http://www.ontobee.org/ontology/DOID?iri=http://purl.obolibrary.org/obo/DOID_3620	13	111	0.0136786	0.152175	ARL4D;BCL2;CCND1;CDKN1A;COL1A2;MMP11;MYCN;RB1;SFN;TP53;TP73;YWHAH;YWHAZ
DOID:74	hematopoietic system disease	http://www.ontobee.org/ontology/DOID?iri=http://purl.obolibrary.org/obo/DOID_74	36	418	0.0138229	0.152195	ACSL6;ADAM12;ATP2A2;BCL2;BCL2L1;CASP3;CCND1;CD86;CDKN1A;CEBPD;DUSP1;EDN1;ERCC4;FAS;FASLG;FCGR3B;HMGA2;ICOS;IDH2;IGF1R;IL10;IL13;IL18;IL25;ITGB3;KRAS;MIF;MSN;NRAS;PIGA;PRM2;SH2B3;THBS1;TNFRSF1B;TP53;TP73
DOID:1192	peripheral nervous system neoplasm	http://www.ontobee.org/ontology/DOID?iri=http://purl.obolibrary.org/obo/DOID_1192	32	362	0.0139781	0.152332	AGER;AIFM1;ATF2;BCL2;BCL2L1;BMP5;BTG2;CCND1;CDKN1A;CXCR5;CYP19A1;DKK3;DUSP1;GAS7;HMGA1;HOXC11;ICMT;IGF1R;LYVE1;MYCN;PDGFB;PHOX2B;PMAIP1;PTAFR;RAP1GDS1;RB1;SOX9;SYT1;TLX2;TP53;TP73;VSNL1
DOID:2600	laryngeal carcinoma	http://www.ontobee.org/ontology/DOID?iri=http://purl.obolibrary.org/obo/DOID_2600	5	25	0.0141392	0.152531	BCL2;CASP3;CDKN1A;IL13;RB1
DOID:660	adrenal cortex cancer	http://www.ontobee.org/ontology/DOID?iri=http://purl.obolibrary.org/obo/DOID_660	4	17	0.0156091	0.165876	BMP5;CCND1;HBEGF;TP53
DOID:7148	rheumatoid arthritis	http://www.ontobee.org/ontology/DOID?iri=http://purl.obolibrary.org/obo/DOID_7148	40	479	0.0156868	0.165876	ADAMTS5;ADRB2;ADRB3;AGER;BCL2;BCL2L1;BMP5;CCL21;CCL7;CD86;CDKN1A;CLEC16A;EDN1;ENGASE;FAS;FASLG;FCGR3B;ICOS;IKBKE;IL10;IL13;IL18;KPNA1;LTB;MAP3K2;MIF;PRDM1;PRKCZ;RAP1A;RB1;RUNX1T1;S100A8;S1PR2;SEMA3C;SOCS1;TAB2;THBS1;TNFRSF1B;TNFSF9;TP53
DOID:3451	skin carcinoma	http://www.ontobee.org/ontology/DOID?iri=http://purl.obolibrary.org/obo/DOID_3451	8	56	0.0164735	0.172488	BCL2L1;CCND1;CDKN1A;IGF1R;MYCN;SMO;THBS1;TP53
DOID:1686	glaucoma	http://www.ontobee.org/ontology/DOID?iri=http://purl.obolibrary.org/obo/DOID_1686	11	90	0.0167144	0.17331	ADRB1;ADRB2;BCL2;BCL2L1;CASP3;CDKN1A;CYP46A1;FAS;FASLG;TP53;VAV3
DOID:0080006	bone development disease	http://www.ontobee.org/ontology/DOID?iri=http://purl.obolibrary.org/obo/DOID_0080006	7	46	0.0175397	0.180119	COL1A1;COL1A2;COL9A1;HOXD10;IGF1R;KRAS;ROR2
DOID:3069	astrocytoma	http://www.ontobee.org/ontology/DOID?iri=http://purl.obolibrary.org/obo/DOID_3069	12	103	0.0181534	0.182904	BCL2;BCL2L1;CASP3;CCND1;CDKN1A;FAS;IGF1R;KRAS;MIF;RB1;TP53;TSC1
DOID:8469	influenza	http://www.ontobee.org/ontology/DOID?iri=http://purl.obolibrary.org/obo/DOID_8469	12	103	0.0181534	0.182904	CASP3;CPSF4;CRK;IL10;KPNA1;MIF;NXF1;SOCS1;TMPRSS2;TNFSF9;TP53;UBE2I
DOID:12336	male infertility	http://www.ontobee.org/ontology/DOID?iri=http://purl.obolibrary.org/obo/DOID_12336	10	80	0.0190388	0.183732	BCL2;CDC25A;CYP19A1;FAS;FASLG;MIF;PRM2;RAP1A;TP53;VDAC2
DOID:2876	laryngeal squamous cell carcinoma	http://www.ontobee.org/ontology/DOID?iri=http://purl.obolibrary.org/obo/DOID_2876	4	18	0.0191521	0.183732	BCL2;CDKN1A;IL13;RB1
DOID:12270	coloboma	http://www.ontobee.org/ontology/DOID?iri=http://purl.obolibrary.org/obo/DOID_12270	2	4	0.0194118	0.183732	CHD7;SOX2
DOID:3541	cerebral ventricle cancer	http://www.ontobee.org/ontology/DOID?iri=http://purl.obolibrary.org/obo/DOID_3541	2	4	0.0194118	0.183732	MYCN;TP53
DOID:3878	intestinal pseudo-obstruction	http://www.ontobee.org/ontology/DOID?iri=http://purl.obolibrary.org/obo/DOID_3878	2	4	0.0194118	0.183732	FAS;SCN5A
DOID:8805	intermediate coronary syndrome	http://www.ontobee.org/ontology/DOID?iri=http://purl.obolibrary.org/obo/DOID_8805	2	4	0.0194118	0.183732	IL18;ITGB3
DOID:48	male reproductive system disease	http://www.ontobee.org/ontology/DOID?iri=http://purl.obolibrary.org/obo/DOID_48	12	104	0.019466	0.183732	BCL2;CDC25A;CYP19A1;FAS;FASLG;IL10;ITGB3;MIF;PRM2;RAP1A;TP53;VDAC2
DOID:4074	pancreas adenocarcinoma	http://www.ontobee.org/ontology/DOID?iri=http://purl.obolibrary.org/obo/DOID_4074	16	154	0.0196119	0.183732	BCL2;COL4A6;EPHA4;FAS;HMGA1;HMGA2;IGF1R;IGF2BP3;KLK10;KRAS;NGF;PRKCZ;RRM2;THBS1;TP53;TP73
DOID:3342	bone inflammation disease	http://www.ontobee.org/ontology/DOID?iri=http://purl.obolibrary.org/obo/DOID_3342	50	634	0.0200511	0.186213	ADAM15;ADAMTS5;ADRB2;ADRB3;AGER;BCL2;BCL2L1;BMP5;CCL21;CCL7;CCR7;CD86;CDKN1A;CLEC16A;COL1A1;CYP19A1;EDN1;ENGASE;FAS;FASLG;FCGR3B;GHR;ICOS;IKBKE;IL10;IL13;IL18;KPNA1;LTB;MAP3K2;MIF;NGF;P4HA2;PRDM1;PRKCZ;RAP1A;RB1;RORC;RUNX1T1;S100A8;S1PR2;SEMA3C;SOCS1;SOX9;TAB2;TGFBR3;THBS1;TNFRSF1B;TNFSF9;TP53
DOID:0060122	integumentary system cancer	http://www.ontobee.org/ontology/DOID?iri=http://purl.obolibrary.org/obo/DOID_0060122	11	93	0.0209242	0.188475	ATF2;BCL2L1;CASP3;CCND1;CDKN1A;CHUK;IGF1R;MYCN;SMO;THBS1;TP53
DOID:4159	skin cancer	http://www.ontobee.org/ontology/DOID?iri=http://purl.obolibrary.org/obo/DOID_4159	11	93	0.0209242	0.188475	ATF2;BCL2L1;CASP3;CCND1;CDKN1A;CHUK;IGF1R;MYCN;SMO;THBS1;TP53
DOID:2621	autonomic nervous system neoplasm	http://www.ontobee.org/ontology/DOID?iri=http://purl.obolibrary.org/obo/DOID_2621	29	331	0.0210005	0.188475	AGER;AIFM1;ATF2;BCL2;BCL2L1;BTG2;CCND1;CDKN1A;CXCR5;CYP19A1;DKK3;DUSP1;GAS7;HMGA1;HOXC11;ICMT;IGF1R;LYVE1;MYCN;PHOX2B;PMAIP1;PTAFR;RAP1GDS1;RB1;SYT1;TLX2;TP53;TP73;VSNL1
DOID:769	neuroblastoma	http://www.ontobee.org/ontology/DOID?iri=http://purl.obolibrary.org/obo/DOID_769	29	331	0.0210005	0.188475	AGER;AIFM1;ATF2;BCL2;BCL2L1;BTG2;CCND1;CDKN1A;CXCR5;CYP19A1;DKK3;DUSP1;GAS7;HMGA1;HOXC11;ICMT;IGF1R;LYVE1;MYCN;PHOX2B;PMAIP1;PTAFR;RAP1GDS1;RB1;SYT1;TLX2;TP53;TP73;VSNL1
DOID:3247	rhabdomyosarcoma	http://www.ontobee.org/ontology/DOID?iri=http://purl.obolibrary.org/obo/DOID_3247	9	70	0.0215571	0.191725	AGER;BCL2L1;CDKN1A;EPHA3;FBN2;HMGA2;IGF1R;KRAS;TP53
DOID:4905	pancreatic carcinoma	http://www.ontobee.org/ontology/DOID?iri=http://purl.obolibrary.org/obo/DOID_4905	21	222	0.0219477	0.191725	ABCC5;BCL2;COL4A6;EPHA4;FAS;HMGA1;HMGA2;IGF1R;IGF2BP3;IL10;IL18;KLK10;KRAS;NGF;PRKCZ;RALB;RRM2;SMO;THBS1;TP53;TP73
DOID:1612	breast cancer	http://www.ontobee.org/ontology/DOID?iri=http://purl.obolibrary.org/obo/DOID_1612	38	461	0.0220807	0.191725	ADAM15;ADAMTS8;ATF2;ATP6V0C;BCL2;BTG2;CASP3;CCND1;CCR7;CDK6;CDKN1A;CHEK2;CYP19A1;DAPK1;EDN1;FAS;GIPC1;HAS2;HOXA1;HSF1;IGF1R;IL10;ITGB3;KCNJ3;LBH;MED28;PRKCZ;RASSF2;RB1;SFN;SOX2;SOX9;TGFBR1;THBS1;TNFRSF1B;TP53;ZEB2;ZFHX4
DOID:5093	thoracic cancer	http://www.ontobee.org/ontology/DOID?iri=http://purl.obolibrary.org/obo/DOID_5093	38	461	0.0220807	0.191725	ADAM15;ADAMTS8;ATF2;ATP6V0C;BCL2;BTG2;CASP3;CCND1;CCR7;CDK6;CDKN1A;CHEK2;CYP19A1;DAPK1;EDN1;FAS;GIPC1;HAS2;HOXA1;HSF1;IGF1R;IL10;ITGB3;KCNJ3;LBH;MED28;PRKCZ;RASSF2;RB1;SFN;SOX2;SOX9;TGFBR1;THBS1;TNFRSF1B;TP53;ZEB2;ZFHX4
DOID:161	keratosis	http://www.ontobee.org/ontology/DOID?iri=http://purl.obolibrary.org/obo/DOID_161	6	38	0.0229396	0.197577	ATP2A2;BCL2;CCND1;CDKN1A;GHR;TP53
DOID:3905	lung carcinoma	http://www.ontobee.org/ontology/DOID?iri=http://purl.obolibrary.org/obo/DOID_3905	38	463	0.0234727	0.200551	ADAM12;ADAM15;ADAMTS8;ADRB2;AGER;AHR;BCL2;BCL2L1;CASP3;CCND1;CCR7;CDKN1A;CHFR;CRMP1;DAPK1;DUSP4;FAS;IGF1R;IGF2BP3;IL13;KRAS;MIF;NRAS;PDGFB;RAP1GDS1;RB1;ROR2;RRM2;S100A2;S100A8;SCD;SOX9;TGFBR3;TP53;TP73;UBE2I;VSNL1;YY1
DOID:1680	chronic cystitis	http://www.ontobee.org/ontology/DOID?iri=http://purl.obolibrary.org/obo/DOID_1680	3	11	0.023864	0.200683	HBEGF;NGF;TP53
DOID:1803	neuritis	http://www.ontobee.org/ontology/DOID?iri=http://purl.obolibrary.org/obo/DOID_1803	3	11	0.023864	0.200683	FAS;FASLG;ITGB3
DOID:0050687	cell type cancer	http://www.ontobee.org/ontology/DOID?iri=http://purl.obolibrary.org/obo/DOID_0050687	102	1449	0.0252437	0.210627	ADAM15;AEN;AGER;AIFM1;ATF2;ATP2A2;BCL2;BCL2L1;BTG2;BZW1;CAPN3;CASP3;CCL21;CCL7;CCND1;CCR7;CD86;CDC25A;CDH5;CDK6;CDKN1A;CDKN2D;CHEK2;CHFR;COL1A2;COL4A6;CRK;DAPK1;DKK3;DMP1;EDN1;ERCC4;FAS;FASLG;FBN2;FZD3;HBEGF;HIC1;HMGA2;HSF1;ICOS;IDH2;IGF1R;IGF2BP3;IKBKE;IL10;IL13;IL18;INPP5A;ITGB3;KCNMB1;KCNN3;KLK10;KRAS;LIMD1;LRIG2;LYVE1;MDM4;MEF2D;MIF;MMP11;MSN;MTUS1;MXD1;MYCN;NGF;NRAS;PBX1;PBX2;PDGFB;PHOX2B;PI…
DOID:1287	cardiovascular system disease	http://www.ontobee.org/ontology/DOID?iri=http://purl.obolibrary.org/obo/DOID_1287	84	1169	0.027409	0.221388	ADAM12;ADAM15;ADIPOR2;ADRB1;ADRB2;ADRB3;AGER;AHR;AIFM1;ARG2;ATP2A2;ATXN1;BCL2;BCL2L1;CASP3;CCL21;CD86;CDH5;CDKN1A;CHD7;CHEK2;CLEC16A;COL1A1;COL1A2;CYP19A1;DUSP1;DYRK1A;EDN1;ESRRG;FAS;FASLG;FBLN5;FBN2;FCGR3B;FKRP;FRMD4B;GATM;GHR;HAS2;HBEGF;HDAC4;ICOS;IGF1R;IL10;IL18;INSR;ISL1;ITGB3;KCNK10;KCNMB1;LBH;LYVE1;MIF;MOCS2;MYH7;NGF;OLR1;P2RX1;PAPPA;PCTP;PDGFB;PLA2G3;PRKCZ;PSMB8;PTPRU;RORC;S100A8;SCD;SCN5A…
DOID:14566	disease of cellular proliferation	http://www.ontobee.org/ontology/DOID?iri=http://purl.obolibrary.org/obo/DOID_14566	270	4269	0.0274395	0.221388	ABCC10;ABCC5;ADAM12;ADAM15;ADAMTS5;ADAMTS8;ADIPOR2;ADRB1;ADRB2;ADRB3;AEN;AFF1;AGER;AHR;AIFM1;AMOT;ANGPTL2;ARG2;ARHGEF7;ARID3A;ARID3B;ARL4D;ASAP1;ATF2;ATP2A2;ATP6V0C;B4GALT5;BACE2;BAG4;BCAT1;BCL2;BCL2L1;BMP5;BRF1;BTG2;BZW1;CAPN3;CASP3;CASP5;CBLL1;CCL21;CCL7;CCND1;CCR7;CD86;CDC25A;CDCA8;CDH22;CDH5;CDK6;CDKN1A;CDKN2D;CEBPD;CHEK2;CHFR;CHRD;CHUK;CLIC4;COIL;COL1A1;COL1A2;COL4A2;COL4A6;CPA4;CPD;CRK;CRMP…
DOID:0060071	pre-malignant neoplasm	http://www.ontobee.org/ontology/DOID?iri=http://purl.obolibrary.org/obo/DOID_0060071	4	20	0.027626	0.221388	CCND1;CDKN1A;IGF2BP3;KRAS
DOID:1107	esophageal carcinoma	http://www.ontobee.org/ontology/DOID?iri=http://purl.obolibrary.org/obo/DOID_1107	12	110	0.0288749	0.221388	BCL2;CCND1;CDKN1A;DAPK1;FAS;IL10;IL18;KRAS;PBX1;S100A2;S100A8;TP53
DOID:350	mastocytosis	http://www.ontobee.org/ontology/DOID?iri=http://purl.obolibrary.org/obo/DOID_350	6	40	0.028897	0.221388	ATP2A2;BCL2;BCL2L1;DUSP1;IL13;NRAS
DOID:162	cancer	http://www.ontobee.org/ontology/DOID?iri=http://purl.obolibrary.org/obo/DOID_162	267	4220	0.0290539	0.221388	ABCC10;ABCC5;ADAM12;ADAM15;ADAMTS5;ADAMTS8;ADIPOR2;ADRB1;ADRB2;ADRB3;AEN;AFF1;AGER;AHR;AIFM1;AMOT;ANGPTL2;ARG2;ARID3A;ARID3B;ARL4D;ASAP1;ATF2;ATP2A2;ATP6V0C;B4GALT5;BACE2;BAG4;BCAT1;BCL2;BCL2L1;BMP5;BRF1;BTG2;BZW1;CAPN3;CASP3;CASP5;CBLL1;CCL21;CCL7;CCND1;CCR7;CD86;CDC25A;CDCA8;CDH22;CDH5;CDK6;CDKN1A;CDKN2D;CEBPD;CHEK2;CHFR;CHRD;CHUK;CLIC4;COIL;COL1A1;COL1A2;COL4A2;COL4A6;CPA4;CPD;CRK;CRMP1;CRY2;C…
DOID:7166	thyroiditis	http://www.ontobee.org/ontology/DOID?iri=http://purl.obolibrary.org/obo/DOID_7166	7	51	0.0295021	0.221388	COL1A1;EDN1;FAS;FASLG;IL18;KRAS;NRAS
DOID:11394	adult respiratory distress syndrome	http://www.ontobee.org/ontology/DOID?iri=http://purl.obolibrary.org/obo/DOID_11394	5	30	0.0297875	0.221388	EDN1;FAS;FASLG;IL10;MIF
DOID:4043	skeletal muscle cancer	http://www.ontobee.org/ontology/DOID?iri=http://purl.obolibrary.org/obo/DOID_4043	9	74	0.0298173	0.221388	AGER;BCL2L1;CDKN1A;EPHA3;FBN2;HMGA2;IGF1R;KRAS;TP53
DOID:9074	systemic lupus erythematosus	http://www.ontobee.org/ontology/DOID?iri=http://purl.obolibrary.org/obo/DOID_9074	9	74	0.0298173	0.221388	BCL2;CASP3;FAS;FASLG;IL10;IL18;ITGB3;MIF;PAPPA
DOID:9500	leukocyte disease	http://www.ontobee.org/ontology/DOID?iri=http://purl.obolibrary.org/obo/DOID_9500	10	86	0.0299754	0.221388	ATP2A2;BCL2;BCL2L1;DUSP1;FAS;IL10;IL13;IL25;KRAS;NRAS
DOID:5295	intestinal disease	http://www.ontobee.org/ontology/DOID?iri=http://purl.obolibrary.org/obo/DOID_5295	15	149	0.0300651	0.221388	CCL21;EDN1;FAS;HBEGF;IL10;IL13;IL18;KCNN3;MIF;PDX1;PHOX2B;S100A8;SCN5A;TP53;ZEB2
DOID:8502	bullous skin disease	http://www.ontobee.org/ontology/DOID?iri=http://purl.obolibrary.org/obo/DOID_8502	3	12	0.0304493	0.221388	IL10;ITGB3;MIF
DOID:3770	pulmonary fibrosis	http://www.ontobee.org/ontology/DOID?iri=http://purl.obolibrary.org/obo/DOID_3770	12	111	0.0307169	0.221388	AGER;CCL21;CCND1;EDN1;FAS;FASLG;FCGR3B;IL13;IL18;MIF;SOCS1;YY1
DOID:1037	lymphoblastic leukemia	http://www.ontobee.org/ontology/DOID?iri=http://purl.obolibrary.org/obo/DOID_1037	32	385	0.0308924	0.221388	ADRB2;AFF1;AHR;BCL2;BCL2L1;CCL21;CCND1;CDK6;CDKN1A;CHEK2;CXCR5;DAPK1;EPHA3;FAS;FASLG;IL10;KRAS;MIF;MLLT10;NRAS;PBX1;PDGFB;PEG10;PMAIP1;RAG1;RAP1GDS1;RB1;RUNX1T1;SOCS1;TLX3;TP53;TP73
DOID:612	primary immunodeficiency disease	http://www.ontobee.org/ontology/DOID?iri=http://purl.obolibrary.org/obo/DOID_612	17	176	0.0310783	0.221388	CCL21;CD86;CHD7;FAS;FASLG;FCGR3B;HIF3A;ICOS;IL10;NGF;RAG1;SNF8;SRSF6;TBX1;TNFRSF1B;TP53;YY1
DOID:1085	Edwards syndrome	http://www.ontobee.org/ontology/DOID?iri=http://purl.obolibrary.org/obo/DOID_1085	2	5	0.0310938	0.221388	ADAM12;VAPA
DOID:12053	cryptococcosis	http://www.ontobee.org/ontology/DOID?iri=http://purl.obolibrary.org/obo/DOID_12053	2	5	0.0310938	0.221388	FCGR3B;IL13
DOID:12347	osteogenesis imperfecta	http://www.ontobee.org/ontology/DOID?iri=http://purl.obolibrary.org/obo/DOID_12347	2	5	0.0310938	0.221388	COL1A1;COL1A2
DOID:14323	Marfan syndrome	http://www.ontobee.org/ontology/DOID?iri=http://purl.obolibrary.org/obo/DOID_14323	2	5	0.0310938	0.221388	FBN2;TGFBR1
DOID:368	cerebrum cancer	http://www.ontobee.org/ontology/DOID?iri=http://purl.obolibrary.org/obo/DOID_368	2	5	0.0310938	0.221388	MYCN;TP53
DOID:4852	pleomorphic xanthoastrocytoma	http://www.ontobee.org/ontology/DOID?iri=http://purl.obolibrary.org/obo/DOID_4852	2	5	0.0310938	0.221388	TP53;TSC1
DOID:5183	hereditary Wilms' tumor	http://www.ontobee.org/ontology/DOID?iri=http://purl.obolibrary.org/obo/DOID_5183	7	52	0.0324248	0.229336	BCL2;CDKN1A;CYP19A1;IGF1R;KRAS;SOX9;TP53
DOID:9261	nasopharynx carcinoma	http://www.ontobee.org/ontology/DOID?iri=http://purl.obolibrary.org/obo/DOID_9261	5	31	0.0338501	0.234494	BCAT1;CASP3;CCND1;CDKN1A;IL10
DOID:3908	non-small cell lung carcinoma	http://www.ontobee.org/ontology/DOID?iri=http://purl.obolibrary.org/obo/DOID_3908	32	388	0.033942	0.234494	ADAM12;ADAMTS8;ADRB2;AGER;AHR;BCL2;BCL2L1;CCR7;CDKN1A;CHFR;CRMP1;DAPK1;DUSP4;FAS;IGF1R;IL13;KRAS;MIF;NRAS;PDGFB;RAP1GDS1;RB1;RRM2;S100A2;S100A8;SCD;SOX9;TGFBR3;TP53;TP73;UBE2I;VSNL1
DOID:3347	osteosarcoma	http://www.ontobee.org/ontology/DOID?iri=http://purl.obolibrary.org/obo/DOID_3347	19	205	0.034152	0.234494	BCL2;BCL2L1;CASP3;CDH5;CDKN1A;COL1A1;DKK3;DUSP1;FAS;HAS2;IGF2BP3;ITGB3;RB1;ROR2;SMO;TGFBR1;TP53;TP73;YY1
DOID:5683	hereditary breast ovarian cancer	http://www.ontobee.org/ontology/DOID?iri=http://purl.obolibrary.org/obo/DOID_5683	19	205	0.034152	0.234494	AHR;BCL2;CCND1;CDKN1A;CHEK2;COL1A1;CYP19A1;E2F6;ERCC4;GTF2I;HMGA2;IGF1R;ITGB3;MAP3K1;RB1;SMC1A;TP53;TP73;UBE2I
DOID:3717	gastric adenocarcinoma	http://www.ontobee.org/ontology/DOID?iri=http://purl.obolibrary.org/obo/DOID_3717	10	88	0.0344491	0.234494	BCL2;CASP3;CCND1;COL1A2;IGF1R;MIF;PBX2;S100A2;S100A8;TP53
DOID:10608	celiac disease	http://www.ontobee.org/ontology/DOID?iri=http://purl.obolibrary.org/obo/DOID_10608	9	76	0.0346835	0.234494	ATG16L1;BCL2;CLEC16A;FAS;FASLG;ICOS;IL10;MIF;PBX3
DOID:403	mouth disease	http://www.ontobee.org/ontology/DOID?iri=http://purl.obolibrary.org/obo/DOID_403	16	165	0.0346911	0.234494	AGER;CASP3;CCL7;COL1A1;COL1A2;DMP1;EDN1;FCGR3B;IKBKE;IL10;IL13;IL18;MSN;NGF;S100A8;TP53
DOID:1602	lymphadenitis	http://www.ontobee.org/ontology/DOID?iri=http://purl.obolibrary.org/obo/DOID_1602	7	53	0.035535	0.237196	CASP3;IL10;IL18;MIF;MMP11;S100A8;SOCS1
DOID:9942	lymph node disease	http://www.ontobee.org/ontology/DOID?iri=http://purl.obolibrary.org/obo/DOID_9942	7	53	0.035535	0.237196	CASP3;IL10;IL18;MIF;MMP11;S100A8;SOCS1
DOID:76	stomach disease	http://www.ontobee.org/ontology/DOID?iri=http://purl.obolibrary.org/obo/DOID_76	8	65	0.0370111	0.24229	FAS;FASLG;IL10;MIF;PDX1;RB1;TP53;TP73
DOID:2394	ovarian cancer	http://www.ontobee.org/ontology/DOID?iri=http://purl.obolibrary.org/obo/DOID_2394	25	291	0.0377989	0.24229	BCL2;CASP3;CCND1;CDKN1A;DUSP1;E2F5;EDN1;FAS;FASLG;HAS2;HBEGF;IL10;IL13;IL18;ITGB3;KRAS;LIN28A;MDM4;MIF;PRKCZ;SFN;THBS1;TNFRSF1B;TP53;YWHAZ
DOID:12176	goiter	http://www.ontobee.org/ontology/DOID?iri=http://purl.obolibrary.org/obo/DOID_12176	3	13	0.0378862	0.24229	CCND1;EDN1;FAS
DOID:12895	keratoconjunctivitis sicca	http://www.ontobee.org/ontology/DOID?iri=http://purl.obolibrary.org/obo/DOID_12895	3	13	0.0378862	0.24229	FASLG;IL13;TP53
DOID:1395	schistosomiasis	http://www.ontobee.org/ontology/DOID?iri=http://purl.obolibrary.org/obo/DOID_1395	3	13	0.0378862	0.24229	BCL2;IL10;IL13
DOID:288	endometriosis of uterus	http://www.ontobee.org/ontology/DOID?iri=http://purl.obolibrary.org/obo/DOID_288	3	13	0.0378862	0.24229	CCND1;CDKN1A;RB1
DOID:9368	keratoconjunctivitis	http://www.ontobee.org/ontology/DOID?iri=http://purl.obolibrary.org/obo/DOID_9368	3	13	0.0378862	0.24229	FASLG;IL13;TP53
DOID:2596	larynx cancer	http://www.ontobee.org/ontology/DOID?iri=http://purl.obolibrary.org/obo/DOID_2596	5	32	0.0382405	0.242423	BCL2;CASP3;CDKN1A;IL13;RB1
DOID:5679	retinal disease	http://www.ontobee.org/ontology/DOID?iri=http://purl.obolibrary.org/obo/DOID_5679	32	392	0.0383609	0.242423	ADRB1;ADRB2;AGER;ATXN1;BCL2;BCL2L1;CASP3;CCND1;CDK6;CDKN1A;CHEK2;CYP46A1;DAPK1;EDN1;ELOVL4;FAS;FASLG;FBLN5;FZD4;GTF2I;HMGA2;IGF1R;IMPG2;IQCB1;MDM4;MYCN;RB1;SMC1A;TARDBP;TP53;TP73;VAV3
DOID:3829	pituitary adenoma	http://www.ontobee.org/ontology/DOID?iri=http://purl.obolibrary.org/obo/DOID_3829	7	54	0.0388365	0.243984	AHR;BCL2;CCND1;CDKN1A;FASLG;GHR;RB1
DOID:8857	lupus erythematosus	http://www.ontobee.org/ontology/DOID?iri=http://purl.obolibrary.org/obo/DOID_8857	9	78	0.0400711	0.249823	BCL2;CASP3;FAS;FASLG;IL10;IL18;ITGB3;MIF;PAPPA
DOID:3095	germ cell and embryonal cancer	http://www.ontobee.org/ontology/DOID?iri=http://purl.obolibrary.org/obo/DOID_3095	16	169	0.0418681	0.249823	BCL2;BTG2;CCND1;CDK6;CDKN1A;COL1A2;HIC1;IGF1R;MYCN;PBX2;PDGFB;RB1;SOX2;THBS1;TP53;TP73
DOID:870	neuropathy	http://www.ontobee.org/ontology/DOID?iri=http://purl.obolibrary.org/obo/DOID_870	20	224	0.0424165	0.249823	AGER;BCL2;CAPN3;CASP3;EDN1;FAS;FASLG;FKRP;GAN;HOXA1;HOXD10;IL10;ITGB3;MMP11;MYH7;PHOX2B;PLXND1;SLC25A4;TP53;UTRN
DOID:14227	azoospermia	http://www.ontobee.org/ontology/DOID?iri=http://purl.obolibrary.org/obo/DOID_14227	5	33	0.0429632	0.249823	BCL2;FAS;FASLG;PRM2;RAP1A
DOID:3355	fibrosarcoma	http://www.ontobee.org/ontology/DOID?iri=http://purl.obolibrary.org/obo/DOID_3355	5	33	0.0429632	0.249823	BCL2L1;COL1A1;PDGFB;SOX2;TP53
DOID:3443	mammary Paget's disease	http://www.ontobee.org/ontology/DOID?iri=http://purl.obolibrary.org/obo/DOID_3443	5	33	0.0429632	0.249823	ATF2;CCND1;EDN1;RB1;TP53
DOID:9352	type 2 diabetes mellitus	http://www.ontobee.org/ontology/DOID?iri=http://purl.obolibrary.org/obo/DOID_9352	18	197	0.0434263	0.249823	ADIPOR2;AGER;FAS;FASLG;IGF2BP2;IL10;IL18;ISL1;ITGB3;MAP3K1;MIF;MSN;PBX1;PDX1;RDX;RORC;S100A8;SCD
DOID:8692	myeloid leukemia	http://www.ontobee.org/ontology/DOID?iri=http://purl.obolibrary.org/obo/DOID_8692	13	130	0.0435887	0.249823	BCL2;BCL2L1;CCND1;CDKN1A;CEBPD;FAS;FASLG;IGF1R;IL18;KRAS;RAG1;RB1;RUNX1T1
DOID:1070	primary open angle glaucoma	http://www.ontobee.org/ontology/DOID?iri=http://purl.obolibrary.org/obo/DOID_1070	6	44	0.043662	0.249823	CDKN1A;CYP46A1;FAS;FASLG;TP53;VAV3
DOID:3151	skin squamous cell carcinoma	http://www.ontobee.org/ontology/DOID?iri=http://purl.obolibrary.org/obo/DOID_3151	4	23	0.0439412	0.249823	BCL2L1;CCND1;THBS1;TP53
DOID:2151	malignant ovarian surface epithelial-stromal neoplasm	http://www.ontobee.org/ontology/DOID?iri=http://purl.obolibrary.org/obo/DOID_2151	23	267	0.0440007	0.249823	BCL2;CASP3;CCND1;CDKN1A;DUSP1;E2F5;EDN1;FAS;FASLG;HAS2;HBEGF;IL10;IL18;ITGB3;LIN28A;MDM4;MIF;PRKCZ;SFN;THBS1;TNFRSF1B;TP53;YWHAZ
DOID:2152	ovary epithelial cancer	http://www.ontobee.org/ontology/DOID?iri=http://purl.obolibrary.org/obo/DOID_2152	23	267	0.0440007	0.249823	BCL2;CASP3;CCND1;CDKN1A;DUSP1;E2F5;EDN1;FAS;FASLG;HAS2;HBEGF;IL10;IL18;ITGB3;LIN28A;MDM4;MIF;PRKCZ;SFN;THBS1;TNFRSF1B;TP53;YWHAZ
DOID:4001	ovarian carcinoma	http://www.ontobee.org/ontology/DOID?iri=http://purl.obolibrary.org/obo/DOID_4001	23	267	0.0440007	0.249823	BCL2;CASP3;CCND1;CDKN1A;DUSP1;E2F5;EDN1;FAS;FASLG;HAS2;HBEGF;IL10;IL18;ITGB3;LIN28A;MDM4;MIF;PRKCZ;SFN;THBS1;TNFRSF1B;TP53;YWHAZ
DOID:11338	tetanus	http://www.ontobee.org/ontology/DOID?iri=http://purl.obolibrary.org/obo/DOID_11338	2	6	0.0448346	0.249823	IL10;PRDM1
DOID:11615	penile cancer	http://www.ontobee.org/ontology/DOID?iri=http://purl.obolibrary.org/obo/DOID_11615	2	6	0.0448346	0.249823	KRAS;TP53
DOID:12309	urticaria pigmentosa	http://www.ontobee.org/ontology/DOID?iri=http://purl.obolibrary.org/obo/DOID_12309	2	6	0.0448346	0.249823	BCL2;BCL2L1
DOID:1949	cholecystitis	http://www.ontobee.org/ontology/DOID?iri=http://purl.obolibrary.org/obo/DOID_1949	2	6	0.0448346	0.249823	FAS;TP53
DOID:3449	penis carcinoma	http://www.ontobee.org/ontology/DOID?iri=http://purl.obolibrary.org/obo/DOID_3449	2	6	0.0448346	0.249823	KRAS;TP53
DOID:7941	Barrett's adenocarcinoma	http://www.ontobee.org/ontology/DOID?iri=http://purl.obolibrary.org/obo/DOID_7941	2	6	0.0448346	0.249823	KRAS;S100A2
DOID:10534	stomach cancer	http://www.ontobee.org/ontology/DOID?iri=http://purl.obolibrary.org/obo/DOID_10534	22	254	0.0457979	0.249823	ADIPOR2;BCL2;CASP3;CCND1;CDKN1A;COL1A2;FAS;FASLG;IGF1R;IL10;IL18;ITGB3;KRAS;MIF;MMP11;PBX2;PDX1;RB1;S100A2;S100A8;SOX2;TP53
DOID:5041	esophageal cancer	http://www.ontobee.org/ontology/DOID?iri=http://purl.obolibrary.org/obo/DOID_5041	13	131	0.0459099	0.249823	BCL2;CCND1;CDKN1A;DAPK1;FAS;IL10;IL18;KRAS;PBX1;RB1;S100A2;S100A8;TP53
DOID:10140	dry eye syndrome	http://www.ontobee.org/ontology/DOID?iri=http://purl.obolibrary.org/obo/DOID_10140	3	14	0.0461573	0.249823	FASLG;IL13;TP53
DOID:1400	lacrimal apparatus disease	http://www.ontobee.org/ontology/DOID?iri=http://purl.obolibrary.org/obo/DOID_1400	3	14	0.0461573	0.249823	FASLG;IL13;TP53
DOID:2256	osteochondrodysplasia	http://www.ontobee.org/ontology/DOID?iri=http://purl.obolibrary.org/obo/DOID_2256	3	14	0.0461573	0.249823	COL1A1;COL1A2;COL9A1
DOID:2945	severe acute respiratory syndrome	http://www.ontobee.org/ontology/DOID?iri=http://purl.obolibrary.org/obo/DOID_2945	3	14	0.0461573	0.249823	BCL2L1;IL10;RB1
DOID:4231	histiocytoma	http://www.ontobee.org/ontology/DOID?iri=http://purl.obolibrary.org/obo/DOID_4231	3	14	0.0461573	0.249823	HBEGF;HMGA2;RB1
DOID:615	leukopenia	http://www.ontobee.org/ontology/DOID?iri=http://purl.obolibrary.org/obo/DOID_615	6	45	0.047973	0.249823	BCL2;BCL2L1;FAS;IL10;KRAS;NRAS
DOID:170	endocrine gland cancer	http://www.ontobee.org/ontology/DOID?iri=http://purl.obolibrary.org/obo/DOID_170	36	459	0.048347	0.249823	ABCC5;BCL2;BMP5;CCND1;CCR7;CD86;CDC25A;CDKN1A;COL4A6;EPHA4;FAS;FASLG;HBEGF;HMGA1;HMGA2;IGF1R;IGF2BP3;IL10;IL18;KLK10;KRAS;LBR;MAP3K1;MMP11;NGF;NRAS;PDX1;PRKCZ;RALB;RAP1A;RB1;RRM2;SMO;THBS1;TP53;TP73
DOID:1793	pancreatic cancer	http://www.ontobee.org/ontology/DOID?iri=http://purl.obolibrary.org/obo/DOID_1793	25	299	0.0496016	0.249823	ABCC5;BCL2;COL4A6;EPHA4;FAS;FASLG;HMGA1;HMGA2;IGF1R;IGF2BP3;IL10;IL18;KLK10;KRAS;MAP3K1;NGF;PDX1;PRKCZ;RALB;RB1;RRM2;SMO;THBS1;TP53;TP73
DOID:0050739	autosomal genetic disease	http://www.ontobee.org/ontology/DOID?iri=http://purl.obolibrary.org/obo/DOID_0050739	42	550	0.0498491	0.249823	ADRB1;ADRB2;ADRB3;AHR;ARG2;BCL2;CASP3;CCDC28B;CCND1;CDKN1A;CHEK2;COL1A1;CYP19A1;E2F6;EDN1;ERCC4;FBN2;GHR;GTF2I;HMGA2;IGF1R;IL10;IL18;ITGB3;KRAS;MAP3K1;MYH7;NRAS;PRKAA2;RAP1A;RB1;SCD;SCN5A;SLC20A1;SMC1A;SMO;TGFBR1;TP53;TP73;TSC1;UBE2I;USP6
DOID:643	progressive multifocal leukoencephalopathy	http://www.ontobee.org/ontology/DOID?iri=http://purl.obolibrary.org/obo/DOID_643	7	57	0.0499217	0.249823	CHEK2;CHFR;COIL;ELF4;PIAS4;TP53;TP73
DOID:5409	lung small cell carcinoma	http://www.ontobee.org/ontology/DOID?iri=http://purl.obolibrary.org/obo/DOID_5409	8	69	0.0500808	0.249823	BCL2;CCND1;CDKN1A;IGF2BP3;KRAS;RAP1GDS1;RB1;TP53
DOID:3192	neurilemmoma	http://www.ontobee.org/ontology/DOID?iri=http://purl.obolibrary.org/obo/DOID_3192	4	24	0.0503547	0.249823	ARHGEF7;BMP5;CCND1;RB1
DOID:8552	chronic myeloid leukemia	http://www.ontobee.org/ontology/DOID?iri=http://purl.obolibrary.org/obo/DOID_8552	4	24	0.0503547	0.249823	BCL2;BCL2L1;CCND1;CDKN1A
DOID:0060085	organ system benign neoplasm	http://www.ontobee.org/ontology/DOID?iri=http://purl.obolibrary.org/obo/DOID_0060085	21	244	0.0531233	0.249823	AHR;ARHGEF7;BCL2;BCL2L1;BMP5;CCND1;CDKN1A;COL1A1;CYP19A1;EDN1;FAS;FASLG;GHR;HMGA2;IGF1R;KRAS;RB1;SNAP23;SOX2;SOX9;TP53
DOID:3969	papillary thyroid carcinoma	http://www.ontobee.org/ontology/DOID?iri=http://purl.obolibrary.org/obo/DOID_3969	10	95	0.0537337	0.249823	CCND1;CCR7;CDKN1A;KRAS;LBR;MMP11;NRAS;RAP1A;RB1;TP53
DOID:11971	synostosis	http://www.ontobee.org/ontology/DOID?iri=http://purl.obolibrary.org/obo/DOID_11971	3	15	0.0552384	0.249823	IGF1R;KRAS;ROR2
DOID:1679	cystitis	http://www.ontobee.org/ontology/DOID?iri=http://purl.obolibrary.org/obo/DOID_1679	3	15	0.0552384	0.249823	HBEGF;NGF;TP53
DOID:11613	hyperandrogenism	http://www.ontobee.org/ontology/DOID?iri=http://purl.obolibrary.org/obo/DOID_11613	4	25	0.0572529	0.249823	CYP19A1;INSR;IRS2;TNFRSF1B
DOID:12177	common variable immunodeficiency	http://www.ontobee.org/ontology/DOID?iri=http://purl.obolibrary.org/obo/DOID_12177	4	25	0.0572529	0.249823	CD86;ICOS;IL10;TNFRSF1B
DOID:0050624	gastrointestinal system benign neoplasm	http://www.ontobee.org/ontology/DOID?iri=http://purl.obolibrary.org/obo/DOID_0050624	6	47	0.0573588	0.249823	BCL2;BCL2L1;CCND1;HMGA2;KRAS;TP53
DOID:3376	bone osteosarcoma	http://www.ontobee.org/ontology/DOID?iri=http://purl.obolibrary.org/obo/DOID_3376	6	47	0.0573588	0.249823	BCL2;CASP3;CDKN1A;FAS;ITGB3;RB1
DOID:0050621	respiratory system benign neoplasm	http://www.ontobee.org/ontology/DOID?iri=http://purl.obolibrary.org/obo/DOID_0050621	5	36	0.0591504	0.249823	BCL2;CDKN1A;FAS;FASLG;KRAS
DOID:0080007	bone deterioration disease	http://www.ontobee.org/ontology/DOID?iri=http://purl.obolibrary.org/obo/DOID_0080007	1	1	0.0592771	0.249823	PDGFB
DOID:10071	larynx squamous papilloma	http://www.ontobee.org/ontology/DOID?iri=http://purl.obolibrary.org/obo/DOID_10071	1	1	0.0592771	0.249823	CDKN1A
DOID:10629	microphthalmia	http://www.ontobee.org/ontology/DOID?iri=http://purl.obolibrary.org/obo/DOID_10629	1	1	0.0592771	0.249823	SOX2
DOID:13198	endemic goiter	http://www.ontobee.org/ontology/DOID?iri=http://purl.obolibrary.org/obo/DOID_13198	1	1	0.0592771	0.249823	EDN1
DOID:13208	background diabetic retinopathy	http://www.ontobee.org/ontology/DOID?iri=http://purl.obolibrary.org/obo/DOID_13208	1	1	0.0592771	0.249823	EDN1
DOID:13711	dental fluorosis	http://www.ontobee.org/ontology/DOID?iri=http://purl.obolibrary.org/obo/DOID_13711	1	1	0.0592771	0.249823	COL1A2
DOID:139	squamous cell papilloma	http://www.ontobee.org/ontology/DOID?iri=http://purl.obolibrary.org/obo/DOID_139	1	1	0.0592771	0.249823	TP53
DOID:14174	central neurocytoma	http://www.ontobee.org/ontology/DOID?iri=http://purl.obolibrary.org/obo/DOID_14174	1	1	0.0592771	0.249823	MYCN
DOID:14188	frozen shoulder	http://www.ontobee.org/ontology/DOID?iri=http://purl.obolibrary.org/obo/DOID_14188	1	1	0.0592771	0.249823	COL1A1
DOID:14336	estrogen excess	http://www.ontobee.org/ontology/DOID?iri=http://purl.obolibrary.org/obo/DOID_14336	1	1	0.0592771	0.249823	CYP19A1
DOID:14555	Foster-Kennedy syndrome	http://www.ontobee.org/ontology/DOID?iri=http://purl.obolibrary.org/obo/DOID_14555	1	1	0.0592771	0.249823	CASP3
DOID:146	papilledema	http://www.ontobee.org/ontology/DOID?iri=http://purl.obolibrary.org/obo/DOID_146	1	1	0.0592771	0.249823	CASP3
DOID:14753	isovaleric acidemia	http://www.ontobee.org/ontology/DOID?iri=http://purl.obolibrary.org/obo/DOID_14753	1	1	0.0592771	0.249823	IVD
DOID:1587	thrombocytopenia due to platelet alloimmunization	http://www.ontobee.org/ontology/DOID?iri=http://purl.obolibrary.org/obo/DOID_1587	1	1	0.0592771	0.249823	ITGB3
DOID:2632	papillary serous adenocarcinoma	http://www.ontobee.org/ontology/DOID?iri=http://purl.obolibrary.org/obo/DOID_2632	1	1	0.0592771	0.249823	KRAS
DOID:2734	keratosis follicularis	http://www.ontobee.org/ontology/DOID?iri=http://purl.obolibrary.org/obo/DOID_2734	1	1	0.0592771	0.249823	ATP2A2
DOID:3341	osteitis fibrosa	http://www.ontobee.org/ontology/DOID?iri=http://purl.obolibrary.org/obo/DOID_3341	1	1	0.0592771	0.249823	USP6
DOID:3720	extramedullary plasmacytoma	http://www.ontobee.org/ontology/DOID?iri=http://purl.obolibrary.org/obo/DOID_3720	1	1	0.0592771	0.249823	CCND1
DOID:3906	bronchial neoplasm	http://www.ontobee.org/ontology/DOID?iri=http://purl.obolibrary.org/obo/DOID_3906	1	1	0.0592771	0.249823	KRAS
DOID:4257	Caffey disease	http://www.ontobee.org/ontology/DOID?iri=http://purl.obolibrary.org/obo/DOID_4257	1	1	0.0592771	0.249823	COL1A1
DOID:4648	familial retinoblastoma	http://www.ontobee.org/ontology/DOID?iri=http://purl.obolibrary.org/obo/DOID_4648	1	1	0.0592771	0.249823	RB1
DOID:4650	bilateral retinoblastoma	http://www.ontobee.org/ontology/DOID?iri=http://purl.obolibrary.org/obo/DOID_4650	1	1	0.0592771	0.249823	RB1
DOID:5050	ehrlich tumor carcinoma	http://www.ontobee.org/ontology/DOID?iri=http://purl.obolibrary.org/obo/DOID_5050	1	1	0.0592771	0.249823	RB1
DOID:5559	mediastinal cancer	http://www.ontobee.org/ontology/DOID?iri=http://purl.obolibrary.org/obo/DOID_5559	1	1	0.0592771	0.249823	CCND1
DOID:6725	spinal stenosis	http://www.ontobee.org/ontology/DOID?iri=http://purl.obolibrary.org/obo/DOID_6725	1	1	0.0592771	0.249823	PDGFB
DOID:6868	mediastinal malignant lymphoma	http://www.ontobee.org/ontology/DOID?iri=http://purl.obolibrary.org/obo/DOID_6868	1	1	0.0592771	0.249823	CCND1
DOID:6903	eye lymphoma	http://www.ontobee.org/ontology/DOID?iri=http://purl.obolibrary.org/obo/DOID_6903	1	1	0.0592771	0.249823	BCL2
DOID:6945	inverted follicular keratosis	http://www.ontobee.org/ontology/DOID?iri=http://purl.obolibrary.org/obo/DOID_6945	1	1	0.0592771	0.249823	BCL2
DOID:7327	pseudosarcomatous fibromatosis	http://www.ontobee.org/ontology/DOID?iri=http://purl.obolibrary.org/obo/DOID_7327	1	1	0.0592771	0.249823	HMGA2
DOID:7371	superficial urinary bladder cancer	http://www.ontobee.org/ontology/DOID?iri=http://purl.obolibrary.org/obo/DOID_7371	1	1	0.0592771	0.249823	CCND1
DOID:7615	sarcomatosis	http://www.ontobee.org/ontology/DOID?iri=http://purl.obolibrary.org/obo/DOID_7615	1	1	0.0592771	0.249823	TP53
DOID:775	intraocular lymphoma	http://www.ontobee.org/ontology/DOID?iri=http://purl.obolibrary.org/obo/DOID_775	1	1	0.0592771	0.249823	BCL2
DOID:778	delusional disorder	http://www.ontobee.org/ontology/DOID?iri=http://purl.obolibrary.org/obo/DOID_778	1	1	0.0592771	0.249823	KCNN3
DOID:8533	hypopharynx cancer	http://www.ontobee.org/ontology/DOID?iri=http://purl.obolibrary.org/obo/DOID_8533	1	1	0.0592771	0.249823	CDKN1A
DOID:9362	status asthmaticus	http://www.ontobee.org/ontology/DOID?iri=http://purl.obolibrary.org/obo/DOID_9362	1	1	0.0592771	0.249823	ADRB2
DOID:0060073	lymphatic system cancer	http://www.ontobee.org/ontology/DOID?iri=http://purl.obolibrary.org/obo/DOID_0060073	2	7	0.0603506	0.249823	CASP3;PRDM1
DOID:11030	corneal edema	http://www.ontobee.org/ontology/DOID?iri=http://purl.obolibrary.org/obo/DOID_11030	2	7	0.0603506	0.249823	CDKN1A;TP53
DOID:11031	bullous keratopathy	http://www.ontobee.org/ontology/DOID?iri=http://purl.obolibrary.org/obo/DOID_11031	2	7	0.0603506	0.249823	CDKN1A;TP53
DOID:1245	vulva cancer	http://www.ontobee.org/ontology/DOID?iri=http://purl.obolibrary.org/obo/DOID_1245	2	7	0.0603506	0.249823	CASP3;TP53
DOID:1294	vulva carcinoma	http://www.ontobee.org/ontology/DOID?iri=http://purl.obolibrary.org/obo/DOID_1294	2	7	0.0603506	0.249823	CASP3;TP53
DOID:2283	keratopathy	http://www.ontobee.org/ontology/DOID?iri=http://purl.obolibrary.org/obo/DOID_2283	2	7	0.0603506	0.249823	CDKN1A;TP53
DOID:3672	rhabdoid cancer	http://www.ontobee.org/ontology/DOID?iri=http://purl.obolibrary.org/obo/DOID_3672	2	7	0.0603506	0.249823	AIFM1;CCND1
DOID:3721	plasmacytoma	http://www.ontobee.org/ontology/DOID?iri=http://purl.obolibrary.org/obo/DOID_3721	2	7	0.0603506	0.249823	BCL2L1;CCND1
DOID:5138	leiomyomatosis	http://www.ontobee.org/ontology/DOID?iri=http://purl.obolibrary.org/obo/DOID_5138	2	7	0.0603506	0.249823	COL4A6;OPN3
DOID:8440	ileus	http://www.ontobee.org/ontology/DOID?iri=http://purl.obolibrary.org/obo/DOID_8440	2	7	0.0603506	0.249823	FAS;SCN5A
DOID:9952	acute lymphocytic leukemia	http://www.ontobee.org/ontology/DOID?iri=http://purl.obolibrary.org/obo/DOID_9952	6	48	0.0624366	0.257461	AFF1;BCL2;CDKN1A;IL10;RB1;RUNX1T1
DOID:2001	neuroma	http://www.ontobee.org/ontology/DOID?iri=http://purl.obolibrary.org/obo/DOID_2001	4	26	0.0646302	0.261866	ARHGEF7;BMP5;CCND1;RB1
DOID:10941	intracranial aneurysm	http://www.ontobee.org/ontology/DOID?iri=http://purl.obolibrary.org/obo/DOID_10941	3	16	0.065099	0.261866	CASP3;COL1A2;FBN2
DOID:1993	rectum cancer	http://www.ontobee.org/ontology/DOID?iri=http://purl.obolibrary.org/obo/DOID_1993	3	16	0.065099	0.261866	BCL2;CASP3;KRAS
DOID:540	strabismus	http://www.ontobee.org/ontology/DOID?iri=http://purl.obolibrary.org/obo/DOID_540	3	16	0.065099	0.261866	BCL2;MMP11;PHOX2B
DOID:9253	gastrointestinal stromal tumor	http://www.ontobee.org/ontology/DOID?iri=http://purl.obolibrary.org/obo/DOID_9253	3	16	0.065099	0.261866	ADIPOR2;BCL2;CDKN1A
DOID:3111	cystadenocarcinoma	http://www.ontobee.org/ontology/DOID?iri=http://purl.obolibrary.org/obo/DOID_3111	5	37	0.0652213	0.261866	HMGA2;IGF2BP3;ITGB3;KRAS;TP53
DOID:3114	serous cystadenocarcinoma	http://www.ontobee.org/ontology/DOID?iri=http://purl.obolibrary.org/obo/DOID_3114	5	37	0.0652213	0.261866	HMGA2;IGF2BP3;ITGB3;KRAS;TP53
DOID:299	adenocarcinoma	http://www.ontobee.org/ontology/DOID?iri=http://purl.obolibrary.org/obo/DOID_299	14	152	0.0658085	0.262308	BCL2;CASP3;CCND1;CDKN1A;HMGA2;IGF2BP3;IL10;ITGB3;KRAS;RB1;S100A2;S100A8;SOX2;TP53
DOID:2154	nephroblastoma	http://www.ontobee.org/ontology/DOID?iri=http://purl.obolibrary.org/obo/DOID_2154	8	73	0.0658227	0.262308	BCL2;CDKN1A;CYP19A1;IGF1R;KRAS;S1PR2;SOX9;TP53
DOID:178	vascular disease	http://www.ontobee.org/ontology/DOID?iri=http://purl.obolibrary.org/obo/DOID_178	70	997	0.0661952	0.262812	ADAM12;ADAM15;ADIPOR2;ADRB1;ADRB2;ADRB3;AGER;AHR;AIFM1;ARG2;ATP2A2;BCL2;BCL2L1;CASP3;CCL21;CD86;CDH5;CDKN1A;CHEK2;CLEC16A;COL1A1;COL1A2;CYP19A1;EDN1;ESRRG;FAS;FASLG;FBLN5;FBN2;FCGR3B;GHR;HAS2;HBEGF;ICOS;IGF1R;IL10;IL18;INSR;ITGB3;KCNK10;KCNMB1;LYVE1;MIF;MOCS2;NGF;OLR1;P2RX1;PAPPA;PCTP;PDGFB;PLA2G3;PRKCZ;PSMB8;PTPRU;RORC;S100A8;SCD;SCN5A;SH2B3;SOCS1;SOX2;TGFBR1;TGFBR3;THBS1;TNFRSF1B;TP53;TRIB1;YWH…
DOID:2218	blood platelet disease	http://www.ontobee.org/ontology/DOID?iri=http://purl.obolibrary.org/obo/DOID_2218	9	86	0.067187	0.265762	ADAM12;BCL2L1;FAS;FASLG;FCGR3B;IDH2;IL18;ITGB3;THBS1
DOID:13378	Kawasaki disease	http://www.ontobee.org/ontology/DOID?iri=http://purl.obolibrary.org/obo/DOID_13378	6	49	0.0677717	0.267085	CASP3;IL10;IL18;MIF;MMP11;S100A8
DOID:0060158	acquired metabolic disease	http://www.ontobee.org/ontology/DOID?iri=http://purl.obolibrary.org/obo/DOID_0060158	58	811	0.0689605	0.270771	ADIPOR2;ADRB1;ADRB2;ADRB3;AGER;ATP2A2;CAPN3;CCND1;CEBPD;CHEK2;CHUK;CLEC16A;CYP19A1;DUSP1;EDN1;ENGASE;FAS;FASLG;ICOS;IGF1R;IGF2BP2;IGF2BP3;IL10;IL13;IL18;INSR;IRS2;ISL1;ITGB3;KCNMB1;KRAS;MAP3K1;MIF;MSN;OLR1;P2RX1;PBX1;PDX1;PKN2;PRKAA2;PRKAB2;PRKCZ;PTPRF;RB1;RDX;RORC;S100A8;SCD;SH2B3;SMO;SNAP23;SOCS1;SOX2;TAB2;TGFBR1;TNFRSF1B;TP53;TSC1
DOID:1091	tooth disease	http://www.ontobee.org/ontology/DOID?iri=http://purl.obolibrary.org/obo/DOID_1091	13	140	0.0707423	0.275318	AGER;CASP3;CCL7;COL1A1;COL1A2;DMP1;EDN1;FCGR3B;IL10;IL13;IL18;MSN;S100A8
DOID:225	syndrome	http://www.ontobee.org/ontology/DOID?iri=http://purl.obolibrary.org/obo/DOID_225	100	1481	0.0713749	0.275318	ADAM12;ADIPOR2;ADRB1;ADRB2;ADRB3;AGER;AHR;AP1S1;BACE2;BCL2;BCL2L1;CASP3;CCDC28B;CCL21;CCR7;CDH5;CDKN1A;CHD7;CHEK2;CHUK;CLEC16A;COL1A1;COL1A2;COL4A2;COL4A6;COL9A1;CRMP1;CYP19A1;DAPK1;DPYSL3;DYRK1A;EDN1;EPHA4;FAS;FASLG;FBN2;FKRP;GHR;GTF2I;HDAC4;HOXA1;ICOS;IDH2;IGF1R;IGF2BP3;IL10;IL13;IL18;IL25;INSR;IRS2;ITGB3;KCNMB1;KCNQ4;KRAS;LBH;MBTPS2;MIF;MYCN;NGF;NME4;NRAS;OLR1;PAPPA;PDGFB;PDX1;PHOX2B;PIP5K1C;P…
DOID:1319	brain cancer	http://www.ontobee.org/ontology/DOID?iri=http://purl.obolibrary.org/obo/DOID_1319	5	38	0.0716276	0.275318	ARL4D;COL1A2;MYCN;RB1;TP53
DOID:0060115	nervous system benign neoplasm	http://www.ontobee.org/ontology/DOID?iri=http://purl.obolibrary.org/obo/DOID_0060115	4	27	0.0724788	0.275318	ARHGEF7;BMP5;CCND1;RB1
DOID:2583	agammaglobulinemia	http://www.ontobee.org/ontology/DOID?iri=http://purl.obolibrary.org/obo/DOID_2583	4	27	0.0724788	0.275318	CD86;ICOS;IL10;TNFRSF1B
DOID:620	blood protein disease	http://www.ontobee.org/ontology/DOID?iri=http://purl.obolibrary.org/obo/DOID_620	4	27	0.0724788	0.275318	CD86;ICOS;IL10;TNFRSF1B
DOID:114	heart disease	http://www.ontobee.org/ontology/DOID?iri=http://purl.obolibrary.org/obo/DOID_114	35	460	0.0724938	0.275318	ADRB1;ADRB2;ADRB3;AGER;ATP2A2;ATXN1;CHD7;DUSP1;DYRK1A;EDN1;FAS;FCGR3B;FKRP;FRMD4B;GATM;GHR;HDAC4;IGF1R;IL10;IL18;ISL1;ITGB3;LBH;MIF;MYH7;PAPPA;SCN5A;TBX1;TBX5;THBS1;TP53;TRIB1;UNC93B1;YY1;ZNF202
DOID:6050	esophageal disease	http://www.ontobee.org/ontology/DOID?iri=http://purl.obolibrary.org/obo/DOID_6050	6	50	0.0733638	0.275318	ATP2A2;IGF2BP3;IL13;NGF;SKIL;SOX2
DOID:1492	eye and adnexa disease	http://www.ontobee.org/ontology/DOID?iri=http://purl.obolibrary.org/obo/DOID_1492	41	552	0.0741145	0.275318	ADRB1;ADRB2;AGER;ATXN1;BCL2;BCL2L1;CASP3;CCND1;CDK6;CDKN1A;CHD7;CHEK2;COL1A1;CYP46A1;DAPK1;EDN1;ELOVL4;FAS;FASLG;FBLN5;FZD4;GTF2I;HMGA2;IGF1R;IL10;IL13;IL18;IMPG2;IQCB1;MDM4;MMP11;MYCN;PHOX2B;RB1;S100A2;SMC1A;SOX2;TARDBP;TP53;TP73;VAV3
DOID:0060031	autoimmune disease of gastrointestinal tract	http://www.ontobee.org/ontology/DOID?iri=http://purl.obolibrary.org/obo/DOID_0060031	9	88	0.075419	0.275318	ATG16L1;BCL2;CLEC16A;FAS;FASLG;ICOS;IL10;MIF;PBX3
DOID:654	overnutrition	http://www.ontobee.org/ontology/DOID?iri=http://purl.obolibrary.org/obo/DOID_654	24	298	0.0755926	0.275318	ADIPOR2;ADRB1;ADRB2;ADRB3;CAPN3;CCND1;CEBPD;CHUK;CYP19A1;DUSP1;EDN1;FAS;IGF1R;IL10;IL18;INSR;IRS2;ISL1;MIF;OLR1;PBX1;S100A8;SCD;TNFRSF1B
DOID:10325	silicosis	http://www.ontobee.org/ontology/DOID?iri=http://purl.obolibrary.org/obo/DOID_10325	3	17	0.075704	0.275318	FAS;FASLG;IL10
DOID:10487	Hirschsprung's disease	http://www.ontobee.org/ontology/DOID?iri=http://purl.obolibrary.org/obo/DOID_10487	3	17	0.075704	0.275318	KCNN3;PHOX2B;ZEB2
DOID:11836	clubfoot	http://www.ontobee.org/ontology/DOID?iri=http://purl.obolibrary.org/obo/DOID_11836	3	17	0.075704	0.275318	COL1A1;COL9A1;HOXD10
DOID:1891	optic nerve disease	http://www.ontobee.org/ontology/DOID?iri=http://purl.obolibrary.org/obo/DOID_1891	3	17	0.075704	0.275318	CASP3;ITGB3;TP53
DOID:3308	embryonal carcinoma	http://www.ontobee.org/ontology/DOID?iri=http://purl.obolibrary.org/obo/DOID_3308	3	17	0.075704	0.275318	PRDM1;SOX2;ZNF202
DOID:365	bladder disease	http://www.ontobee.org/ontology/DOID?iri=http://purl.obolibrary.org/obo/DOID_365	3	17	0.075704	0.275318	HBEGF;NGF;TP53
DOID:9428	intracranial hypertension	http://www.ontobee.org/ontology/DOID?iri=http://purl.obolibrary.org/obo/DOID_9428	3	17	0.075704	0.275318	CASP3;FAS;FASLG
DOID:630	genetic disease	http://www.ontobee.org/ontology/DOID?iri=http://purl.obolibrary.org/obo/DOID_630	50	692	0.0764821	0.275318	ADAM12;ADRB1;ADRB2;ADRB3;AHR;ARG2;BCL2;CASP3;CCDC28B;CCND1;CDKN1A;CHD7;CHEK2;COL1A1;CRMP1;CYP19A1;E2F6;EDN1;ERCC4;FBN2;GHR;GTF2I;HMGA2;IGF1R;IGF2BP3;IL10;IL18;ITGB3;KRAS;MAP3K1;MYH7;NRAS;PAPPA;PRKAA2;RAP1A;RB1;SCD;SCN5A;SLC20A1;SMC1A;SMO;TBX1;TGFBR1;THBS1;TP53;TP73;TSC1;UBE2I;USP6;VAPA
DOID:10247	pleurisy	http://www.ontobee.org/ontology/DOID?iri=http://purl.obolibrary.org/obo/DOID_10247	2	8	0.0773842	0.275318	FASLG;TP53
DOID:10456	tonsillitis	http://www.ontobee.org/ontology/DOID?iri=http://purl.obolibrary.org/obo/DOID_10456	2	8	0.0773842	0.275318	CASP3;FASLG
DOID:175	vascular cancer	http://www.ontobee.org/ontology/DOID?iri=http://purl.obolibrary.org/obo/DOID_175	2	8	0.0773842	0.275318	ATF2;TP53
DOID:176	cardiovascular cancer	http://www.ontobee.org/ontology/DOID?iri=http://purl.obolibrary.org/obo/DOID_176	2	8	0.0773842	0.275318	ATF2;TP53
DOID:4492	avian influenza	http://www.ontobee.org/ontology/DOID?iri=http://purl.obolibrary.org/obo/DOID_4492	2	8	0.0773842	0.275318	CRK;UBE2I
DOID:4927	Klatskin's tumor	http://www.ontobee.org/ontology/DOID?iri=http://purl.obolibrary.org/obo/DOID_4927	2	8	0.0773842	0.275318	DUSP1;NGF
DOID:7400	Nijmegen breakage syndrome	http://www.ontobee.org/ontology/DOID?iri=http://purl.obolibrary.org/obo/DOID_7400	2	8	0.0773842	0.275318	IGF1R;TP53
DOID:8506	bullous pemphigoid	http://www.ontobee.org/ontology/DOID?iri=http://purl.obolibrary.org/obo/DOID_8506	2	8	0.0773842	0.275318	ITGB3;MIF
DOID:9840	esotropia	http://www.ontobee.org/ontology/DOID?iri=http://purl.obolibrary.org/obo/DOID_9840	2	8	0.0773842	0.275318	BCL2;MMP11
DOID:3371	chondrosarcoma	http://www.ontobee.org/ontology/DOID?iri=http://purl.obolibrary.org/obo/DOID_3371	7	63	0.0775942	0.275318	ADIPOR2;BCL2L1;HDAC4;ITGB3;RB1;SMO;SOX9
DOID:171	neuroectodermal tumor	http://www.ontobee.org/ontology/DOID?iri=http://purl.obolibrary.org/obo/DOID_171	14	156	0.0779761	0.275756	BCL2;BTG2;CCND1;CDK6;CDKN1A;COL1A2;HIC1;IGF1R;MYCN;PDGFB;RB1;THBS1;TP53;TP73
DOID:0050155	sensory system disease	http://www.ontobee.org/ontology/DOID?iri=http://purl.obolibrary.org/obo/DOID_0050155	44	601	0.0790699	0.278153	ADRB1;ADRB2;AGER;ATXN1;BCL2;BCL2L1;CASP3;CCND1;CDK6;CDKN1A;CHD7;CHEK2;COL1A1;CYP46A1;DAPK1;EDN1;ELOVL4;FAS;FASLG;FBLN5;FZD4;GTF2I;HMGA2;IGF1R;IL10;IL13;IL18;IMPG2;IQCB1;ITGB3;KCNQ4;MDM4;MMP11;MYCN;MYO1F;PHOX2B;RB1;S100A2;SMC1A;SOX2;TARDBP;TP53;TP73;VAV3
DOID:0060058	lymphoma	http://www.ontobee.org/ontology/DOID?iri=http://purl.obolibrary.org/obo/DOID_0060058	8	76	0.079435	0.278153	BCL2;BCL2L1;CASP3;CCL21;CCND1;FAS;IL10;IL13
DOID:11335	sarcoidosis	http://www.ontobee.org/ontology/DOID?iri=http://purl.obolibrary.org/obo/DOID_11335	8	76	0.079435	0.278153	AGER;CD86;CDKN1A;COL1A1;FAS;IL18;MIF;S100A8
DOID:0050177	monogenic disease	http://www.ontobee.org/ontology/DOID?iri=http://purl.obolibrary.org/obo/DOID_0050177	42	573	0.0837444	0.292285	ADRB1;ADRB2;ADRB3;AHR;ARG2;BCL2;CASP3;CCDC28B;CCND1;CDKN1A;CHEK2;COL1A1;CYP19A1;E2F6;EDN1;ERCC4;FBN2;GHR;GTF2I;HMGA2;IGF1R;IL10;IL18;ITGB3;KRAS;MAP3K1;MYH7;NRAS;PRKAA2;RAP1A;RB1;SCD;SCN5A;SLC20A1;SMC1A;SMO;TGFBR1;TP53;TP73;TSC1;UBE2I;USP6
DOID:120	female reproductive organ cancer	http://www.ontobee.org/ontology/DOID?iri=http://purl.obolibrary.org/obo/DOID_120	32	421	0.0842843	0.293211	ATP2A2;BCL2;CASP3;CCND1;CDKN1A;CYP19A1;DUSP1;E2F5;EDN1;FAS;FASLG;HAS2;HBEGF;IGF2BP3;IL10;IL13;IL18;INSR;ITGB3;KRAS;LIN28A;MDM4;MIF;NR6A1;PRKCZ;RB1;S100A8;SFN;THBS1;TNFRSF1B;TP53;YWHAZ
DOID:5614	eye disease	http://www.ontobee.org/ontology/DOID?iri=http://purl.obolibrary.org/obo/DOID_5614	40	543	0.0849817	0.294087	ADRB1;ADRB2;AGER;ATXN1;BCL2;BCL2L1;CASP3;CCND1;CDK6;CDKN1A;CHD7;CHEK2;COL1A1;CYP46A1;DAPK1;EDN1;ELOVL4;FAS;FASLG;FBLN5;FZD4;GTF2I;HMGA2;IGF1R;IL10;IL13;IMPG2;IQCB1;MDM4;MMP11;MYCN;PHOX2B;RB1;S100A2;SMC1A;SOX2;TARDBP;TP53;TP73;VAV3
DOID:4866	salivary gland adenoid cystic carcinoma	http://www.ontobee.org/ontology/DOID?iri=http://purl.obolibrary.org/obo/DOID_4866	5	40	0.0854334	0.294087	BCL2;CCND1;NGF;SFN;TP53
DOID:2841	asthma	http://www.ontobee.org/ontology/DOID?iri=http://purl.obolibrary.org/obo/DOID_2841	11	117	0.0855408	0.294087	ADRB2;BCL2;BCL2L1;EDN1;IL10;IL13;IL18;IL25;ITGB3;KCNMB1;NGF
DOID:10883	herpangina	http://www.ontobee.org/ontology/DOID?iri=http://purl.obolibrary.org/obo/DOID_10883	3	18	0.0870144	0.294087	BCL2;RAP1A;S100A8
DOID:12132	Wegener's granulomatosis	http://www.ontobee.org/ontology/DOID?iri=http://purl.obolibrary.org/obo/DOID_12132	3	18	0.0870144	0.294087	FCGR3B;IL10;IL18
DOID:3181	oligodendroglioma	http://www.ontobee.org/ontology/DOID?iri=http://purl.obolibrary.org/obo/DOID_3181	3	18	0.0870144	0.294087	BCL2L1;IDH2;LRIG2
DOID:706	mature B-cell neoplasm	http://www.ontobee.org/ontology/DOID?iri=http://purl.obolibrary.org/obo/DOID_706	3	18	0.0870144	0.294087	BCL2L1;CCND1;IL10
DOID:707	B-cell lymphoma	http://www.ontobee.org/ontology/DOID?iri=http://purl.obolibrary.org/obo/DOID_707	3	18	0.0870144	0.294087	BCL2L1;CCND1;IL10
DOID:799	varicose veins	http://www.ontobee.org/ontology/DOID?iri=http://purl.obolibrary.org/obo/DOID_799	3	18	0.0870144	0.294087	FASLG;P2RX1;TP53
DOID:3326	purpura	http://www.ontobee.org/ontology/DOID?iri=http://purl.obolibrary.org/obo/DOID_3326	7	65	0.088472	0.29619	CASP3;CD86;EDN1;FAS;FASLG;IL18;ITGB3
DOID:9970	obesity	http://www.ontobee.org/ontology/DOID?iri=http://purl.obolibrary.org/obo/DOID_9970	23	289	0.0892545	0.29619	ADIPOR2;ADRB1;ADRB2;ADRB3;CAPN3;CCND1;CEBPD;CHUK;CYP19A1;EDN1;FAS;IGF1R;IL10;IL18;INSR;IRS2;ISL1;MIF;OLR1;PBX1;S100A8;SCD;TNFRSF1B
DOID:2115	B cell deficiency	http://www.ontobee.org/ontology/DOID?iri=http://purl.obolibrary.org/obo/DOID_2115	4	29	0.0895472	0.29619	CD86;ICOS;IL10;TNFRSF1B
DOID:2797	idiopathic interstitial pneumonia	http://www.ontobee.org/ontology/DOID?iri=http://purl.obolibrary.org/obo/DOID_2797	4	29	0.0895472	0.29619	CCL21;CCND1;IL13;IL18
DOID:15	reproductive system disease	http://www.ontobee.org/ontology/DOID?iri=http://purl.obolibrary.org/obo/DOID_15	28	364	0.0910536	0.29619	ACSL6;AHR;BCL2;CCND1;CDC25A;CDKN1A;CHD7;CYP19A1;EDN1;FAS;FASLG;IGF1R;IL10;IL18;INSR;IRS2;ITGB3;KRAS;MIF;PGRMC1;PRM2;RAP1A;RB1;TGFBR3;TNFRSF1B;TP53;VDAC2;YBX2
DOID:0060089	endocrine organ benign neoplasm	http://www.ontobee.org/ontology/DOID?iri=http://purl.obolibrary.org/obo/DOID_0060089	9	92	0.0936666	0.29619	AHR;BCL2;CCND1;CDKN1A;EDN1;FASLG;GHR;RB1;SNAP23
DOID:0060039	autoimmune disease of skin and connective tissue	http://www.ontobee.org/ontology/DOID?iri=http://purl.obolibrary.org/obo/DOID_0060039	2	9	0.0957019	0.29619	ITGB3;MIF
DOID:0060099	musculoskeletal system benign neoplasm	http://www.ontobee.org/ontology/DOID?iri=http://purl.obolibrary.org/obo/DOID_0060099	2	9	0.0957019	0.29619	BCL2;CDKN1A
DOID:1080	filariasis	http://www.ontobee.org/ontology/DOID?iri=http://purl.obolibrary.org/obo/DOID_1080	2	9	0.0957019	0.29619	EDN1;IL13
DOID:1159	functional gastric disease	http://www.ontobee.org/ontology/DOID?iri=http://purl.obolibrary.org/obo/DOID_1159	2	9	0.0957019	0.29619	FAS;MIF
DOID:3307	teratoma	http://www.ontobee.org/ontology/DOID?iri=http://purl.obolibrary.org/obo/DOID_3307	2	9	0.0957019	0.29619	SOX2;TP53
DOID:461	muscle benign neoplasm	http://www.ontobee.org/ontology/DOID?iri=http://purl.obolibrary.org/obo/DOID_461	2	9	0.0957019	0.29619	BCL2;CDKN1A
DOID:6536	plasma cell neoplasm	http://www.ontobee.org/ontology/DOID?iri=http://purl.obolibrary.org/obo/DOID_6536	2	9	0.0957019	0.29619	BCL2L1;CCND1
DOID:4989	pancreatitis	http://www.ontobee.org/ontology/DOID?iri=http://purl.obolibrary.org/obo/DOID_4989	10	106	0.0964264	0.29619	AGER;EDN1;HSF1;IL10;IL18;KRAS;MIF;NRAS;PDGFB;PPP3CA
DOID:5353	colonic disease	http://www.ontobee.org/ontology/DOID?iri=http://purl.obolibrary.org/obo/DOID_5353	4	30	0.098741	0.29619	KCNN3;PHOX2B;S100A8;ZEB2
DOID:11372	megacolon	http://www.ontobee.org/ontology/DOID?iri=http://purl.obolibrary.org/obo/DOID_11372	3	19	0.0989883	0.29619	KCNN3;PHOX2B;ZEB2
DOID:1934	dysostosis	http://www.ontobee.org/ontology/DOID?iri=http://purl.obolibrary.org/obo/DOID_1934	3	19	0.0989883	0.29619	IGF1R;KRAS;ROR2
DOID:235	colonic benign neoplasm	http://www.ontobee.org/ontology/DOID?iri=http://purl.obolibrary.org/obo/DOID_235	3	19	0.0989883	0.29619	BCL2;BCL2L1;KRAS
DOID:3246	embryonal rhabdomyosarcoma	http://www.ontobee.org/ontology/DOID?iri=http://purl.obolibrary.org/obo/DOID_3246	3	19	0.0989883	0.29619	IGF1R;KRAS;TP53
DOID:2916	hypersensitivity reaction type IV disease	http://www.ontobee.org/ontology/DOID?iri=http://purl.obolibrary.org/obo/DOID_2916	8	80	0.100006	0.29619	AGER;CD86;CDKN1A;COL1A1;FAS;IL18;MIF;S100A8
DOID:10223	dermatomyositis	http://www.ontobee.org/ontology/DOID?iri=http://purl.obolibrary.org/obo/DOID_10223	4	31	0.108355	0.29619	AGER;CCL21;FAS;IL10
DOID:1227	neutropenia	http://www.ontobee.org/ontology/DOID?iri=http://purl.obolibrary.org/obo/DOID_1227	4	31	0.108355	0.29619	BCL2;IL10;KRAS;NRAS
DOID:1279	ocular motility disease	http://www.ontobee.org/ontology/DOID?iri=http://purl.obolibrary.org/obo/DOID_1279	4	31	0.108355	0.29619	BCL2;MMP11;PHOX2B;SLC25A4
DOID:12987	agranulocytosis	http://www.ontobee.org/ontology/DOID?iri=http://purl.obolibrary.org/obo/DOID_12987	4	31	0.108355	0.29619	BCL2;IL10;KRAS;NRAS
DOID:13375	temporal arteritis	http://www.ontobee.org/ontology/DOID?iri=http://purl.obolibrary.org/obo/DOID_13375	4	31	0.108355	0.29619	IL10;IL18;ITGB3;MIF
DOID:169	neuroendocrine tumor	http://www.ontobee.org/ontology/DOID?iri=http://purl.obolibrary.org/obo/DOID_169	4	31	0.108355	0.29619	BCL2;CCND1;CDKN1A;IGF1R
DOID:2228	thrombocytosis	http://www.ontobee.org/ontology/DOID?iri=http://purl.obolibrary.org/obo/DOID_2228	4	31	0.108355	0.29619	BCL2L1;IDH2;ITGB3;THBS1
DOID:2706	synovium cancer	http://www.ontobee.org/ontology/DOID?iri=http://purl.obolibrary.org/obo/DOID_2706	4	31	0.108355	0.29619	CRK;IGF1R;MYCN;PIAS4
DOID:525	central nervous system vasculitis	http://www.ontobee.org/ontology/DOID?iri=http://purl.obolibrary.org/obo/DOID_525	4	31	0.108355	0.29619	IL10;IL18;ITGB3;MIF
DOID:5485	synovial sarcoma	http://www.ontobee.org/ontology/DOID?iri=http://purl.obolibrary.org/obo/DOID_5485	4	31	0.108355	0.29619	CRK;IGF1R;MYCN;PIAS4
DOID:75	lymphatic system disease	http://www.ontobee.org/ontology/DOID?iri=http://purl.obolibrary.org/obo/DOID_75	9	95	0.108907	0.29619	CASP3;CCR7;IL10;IL18;MIF;MMP11;S100A8;SOCS1;TP53
DOID:2994	germ cell cancer	http://www.ontobee.org/ontology/DOID?iri=http://purl.obolibrary.org/obo/DOID_2994	35	479	0.111403	0.29619	AEN;AIFM1;BCL2;BCL2L1;BTG2;CCND1;CDK6;CDKN1A;COL1A2;FAS;FASLG;HIC1;HSF1;IGF1R;IL10;IL18;ITGB3;KRAS;MEF2D;MTUS1;MYCN;PBX2;PDGFB;PHOX2B;PRDM1;RB1;RRM2;S100A2;SOX2;THBS1;TP53;TP73;VAV3;YBX2;ZNF202
DOID:452	pleomorphic adenoma	http://www.ontobee.org/ontology/DOID?iri=http://purl.obolibrary.org/obo/DOID_452	3	20	0.111582	0.29619	CCND1;HMGA2;TP53
DOID:4676	uremia	http://www.ontobee.org/ontology/DOID?iri=http://purl.obolibrary.org/obo/DOID_4676	3	20	0.111582	0.29619	ADIPOR2;CCND1;IL10
DOID:9743	diabetic neuropathy	http://www.ontobee.org/ontology/DOID?iri=http://purl.obolibrary.org/obo/DOID_9743	3	20	0.111582	0.29619	AGER;EDN1;SLC25A4
DOID:2213	hemorrhagic disease	http://www.ontobee.org/ontology/DOID?iri=http://purl.obolibrary.org/obo/DOID_2213	12	137	0.111741	0.29619	ADAM12;BCL2L1;CASP3;CD86;EDN1;FAS;FASLG;FCGR3B;IDH2;IL18;ITGB3;THBS1
DOID:1564	fungal infectious disease	http://www.ontobee.org/ontology/DOID?iri=http://purl.obolibrary.org/obo/DOID_1564	7	69	0.112669	0.29619	BCL7A;FAS;FCGR3B;IL10;IL13;S100A8;TNFRSF1B
DOID:374	nutrition disease	http://www.ontobee.org/ontology/DOID?iri=http://purl.obolibrary.org/obo/DOID_374	24	313	0.114533	0.29619	ADIPOR2;ADRB1;ADRB2;ADRB3;CAPN3;CCND1;CEBPD;CHUK;CYP19A1;DUSP1;EDN1;FAS;IGF1R;IL10;IL18;INSR;IRS2;ISL1;MIF;OLR1;PBX1;S100A8;SCD;TNFRSF1B
DOID:0050824	sinoatrial node disease	http://www.ontobee.org/ontology/DOID?iri=http://purl.obolibrary.org/obo/DOID_0050824	1	2	0.115049	0.29619	SCN5A
DOID:0060119	pharynx cancer	http://www.ontobee.org/ontology/DOID?iri=http://purl.obolibrary.org/obo/DOID_0060119	1	2	0.115049	0.29619	CDKN1A
DOID:0080010	bone structure disease	http://www.ontobee.org/ontology/DOID?iri=http://purl.obolibrary.org/obo/DOID_0080010	1	2	0.115049	0.29619	PDGFB
DOID:1035	natural killer cell leukemia	http://www.ontobee.org/ontology/DOID?iri=http://purl.obolibrary.org/obo/DOID_1035	1	2	0.115049	0.29619	FASLG
DOID:10863	paralytic squint	http://www.ontobee.org/ontology/DOID?iri=http://purl.obolibrary.org/obo/DOID_10863	1	2	0.115049	0.29619	PHOX2B
DOID:10869	fourth cranial nerve palsy	http://www.ontobee.org/ontology/DOID?iri=http://purl.obolibrary.org/obo/DOID_10869	1	2	0.115049	0.29619	PHOX2B
DOID:11665	Patau syndrome	http://www.ontobee.org/ontology/DOID?iri=http://purl.obolibrary.org/obo/DOID_11665	1	2	0.115049	0.29619	PAPPA
DOID:11678	onchocerciasis	http://www.ontobee.org/ontology/DOID?iri=http://purl.obolibrary.org/obo/DOID_11678	1	2	0.115049	0.29619	IL13
DOID:11701	selective IgA deficiency disease	http://www.ontobee.org/ontology/DOID?iri=http://purl.obolibrary.org/obo/DOID_11701	1	2	0.115049	0.29619	IL10
DOID:11702	dysgammaglobulinemia	http://www.ontobee.org/ontology/DOID?iri=http://purl.obolibrary.org/obo/DOID_11702	1	2	0.115049	0.29619	IL10
DOID:11914	gastroparesis	http://www.ontobee.org/ontology/DOID?iri=http://purl.obolibrary.org/obo/DOID_11914	1	2	0.115049	0.29619	FAS
DOID:1195	ischemic neuropathy	http://www.ontobee.org/ontology/DOID?iri=http://purl.obolibrary.org/obo/DOID_1195	1	2	0.115049	0.29619	ITGB3
DOID:12929	endocardial fibroelastosis	http://www.ontobee.org/ontology/DOID?iri=http://purl.obolibrary.org/obo/DOID_12929	1	2	0.115049	0.29619	MYH7
DOID:13197	nodular goiter	http://www.ontobee.org/ontology/DOID?iri=http://purl.obolibrary.org/obo/DOID_13197	1	2	0.115049	0.29619	CCND1
DOID:13884	sick sinus syndrome	http://www.ontobee.org/ontology/DOID?iri=http://purl.obolibrary.org/obo/DOID_13884	1	2	0.115049	0.29619	SCN5A
DOID:14110	anus cancer	http://www.ontobee.org/ontology/DOID?iri=http://purl.obolibrary.org/obo/DOID_14110	1	2	0.115049	0.29619	KRAS
DOID:14472	hantavirus pulmonary syndrome	http://www.ontobee.org/ontology/DOID?iri=http://purl.obolibrary.org/obo/DOID_14472	1	2	0.115049	0.29619	CDH5
DOID:2053	reactive cutaneous fibrous lesion	http://www.ontobee.org/ontology/DOID?iri=http://purl.obolibrary.org/obo/DOID_2053	1	2	0.115049	0.29619	TSC1
DOID:2095	sweat gland cancer	http://www.ontobee.org/ontology/DOID?iri=http://purl.obolibrary.org/obo/DOID_2095	1	2	0.115049	0.29619	ATF2
DOID:2512	nevoid basal cell carcinoma syndrome	http://www.ontobee.org/ontology/DOID?iri=http://purl.obolibrary.org/obo/DOID_2512	1	2	0.115049	0.29619	SMO
DOID:2595	glottis cancer	http://www.ontobee.org/ontology/DOID?iri=http://purl.obolibrary.org/obo/DOID_2595	1	2	0.115049	0.29619	CDKN1A
DOID:2598	laryngeal benign neoplasm	http://www.ontobee.org/ontology/DOID?iri=http://purl.obolibrary.org/obo/DOID_2598	1	2	0.115049	0.29619	CDKN1A
DOID:2599	glottis carcinoma	http://www.ontobee.org/ontology/DOID?iri=http://purl.obolibrary.org/obo/DOID_2599	1	2	0.115049	0.29619	CDKN1A
DOID:2712	phimosis	http://www.ontobee.org/ontology/DOID?iri=http://purl.obolibrary.org/obo/DOID_2712	1	2	0.115049	0.29619	ITGB3
DOID:3049	Churg-Strauss syndrome	http://www.ontobee.org/ontology/DOID?iri=http://purl.obolibrary.org/obo/DOID_3049	1	2	0.115049	0.29619	IL10
DOID:3071	gliosarcoma	http://www.ontobee.org/ontology/DOID?iri=http://purl.obolibrary.org/obo/DOID_3071	1	2	0.115049	0.29619	RB1
DOID:327	syringomyelia	http://www.ontobee.org/ontology/DOID?iri=http://purl.obolibrary.org/obo/DOID_327	1	2	0.115049	0.29619	COL1A1
DOID:3343	mucolipidosis	http://www.ontobee.org/ontology/DOID?iri=http://purl.obolibrary.org/obo/DOID_3343	1	2	0.115049	0.29619	GNPTAB
DOID:3350	mesenchymal cell neoplasm	http://www.ontobee.org/ontology/DOID?iri=http://purl.obolibrary.org/obo/DOID_3350	1	2	0.115049	0.29619	CCND1
DOID:3577	Sertoli cell tumor	http://www.ontobee.org/ontology/DOID?iri=http://purl.obolibrary.org/obo/DOID_3577	1	2	0.115049	0.29619	SOX9
DOID:4545	mesenchymal chondrosarcoma	http://www.ontobee.org/ontology/DOID?iri=http://purl.obolibrary.org/obo/DOID_4545	1	2	0.115049	0.29619	SOX9
DOID:4757	sex cord-stromal neoplasm	http://www.ontobee.org/ontology/DOID?iri=http://purl.obolibrary.org/obo/DOID_4757	1	2	0.115049	0.29619	SOX9
DOID:4765	pulmonary blastoma	http://www.ontobee.org/ontology/DOID?iri=http://purl.obolibrary.org/obo/DOID_4765	1	2	0.115049	0.29619	MYCN
DOID:4769	pleuropulmonary blastoma	http://www.ontobee.org/ontology/DOID?iri=http://purl.obolibrary.org/obo/DOID_4769	1	2	0.115049	0.29619	MYCN
DOID:4778	proliferative glomerulonephritis	http://www.ontobee.org/ontology/DOID?iri=http://purl.obolibrary.org/obo/DOID_4778	1	2	0.115049	0.29619	IL10
DOID:4908	anal carcinoma	http://www.ontobee.org/ontology/DOID?iri=http://purl.obolibrary.org/obo/DOID_4908	1	2	0.115049	0.29619	KRAS
DOID:4921	eccrine sweat gland cancer	http://www.ontobee.org/ontology/DOID?iri=http://purl.obolibrary.org/obo/DOID_4921	1	2	0.115049	0.29619	ATF2
DOID:5563	malignant teratoma	http://www.ontobee.org/ontology/DOID?iri=http://purl.obolibrary.org/obo/DOID_5563	1	2	0.115049	0.29619	SOX2
DOID:5637	adenosquamous pancreas carcinoma	http://www.ontobee.org/ontology/DOID?iri=http://purl.obolibrary.org/obo/DOID_5637	1	2	0.115049	0.29619	KRAS
DOID:5648	choroid plexus carcinoma	http://www.ontobee.org/ontology/DOID?iri=http://purl.obolibrary.org/obo/DOID_5648	1	2	0.115049	0.29619	TP53
DOID:6025	selective immunoglobulin deficiency disease	http://www.ontobee.org/ontology/DOID?iri=http://purl.obolibrary.org/obo/DOID_6025	1	2	0.115049	0.29619	IL10
DOID:6193	epithelioid sarcoma	http://www.ontobee.org/ontology/DOID?iri=http://purl.obolibrary.org/obo/DOID_6193	1	2	0.115049	0.29619	CCND1
DOID:6498	seborrheic keratosis	http://www.ontobee.org/ontology/DOID?iri=http://purl.obolibrary.org/obo/DOID_6498	1	2	0.115049	0.29619	BCL2
DOID:6873	skin tag	http://www.ontobee.org/ontology/DOID?iri=http://purl.obolibrary.org/obo/DOID_6873	1	2	0.115049	0.29619	TSC1
DOID:7031	glottis squamous cell carcinoma	http://www.ontobee.org/ontology/DOID?iri=http://purl.obolibrary.org/obo/DOID_7031	1	2	0.115049	0.29619	CDKN1A
DOID:749	active peptic ulcer disease	http://www.ontobee.org/ontology/DOID?iri=http://purl.obolibrary.org/obo/DOID_749	1	2	0.115049	0.29619	ITGB3
DOID:7566	eccrine porocarcinoma	http://www.ontobee.org/ontology/DOID?iri=http://purl.obolibrary.org/obo/DOID_7566	1	2	0.115049	0.29619	ATF2
DOID:8566	herpes simplex	http://www.ontobee.org/ontology/DOID?iri=http://purl.obolibrary.org/obo/DOID_8566	1	2	0.115049	0.29619	DNAJB1
DOID:8675	lymphosarcoma	http://www.ontobee.org/ontology/DOID?iri=http://purl.obolibrary.org/obo/DOID_8675	1	2	0.115049	0.29619	PRDM1
DOID:8886	chorioretinitis	http://www.ontobee.org/ontology/DOID?iri=http://purl.obolibrary.org/obo/DOID_8886	1	2	0.115049	0.29619	IL10
DOID:9521	Laron syndrome	http://www.ontobee.org/ontology/DOID?iri=http://purl.obolibrary.org/obo/DOID_9521	1	2	0.115049	0.29619	GHR
DOID:0050598	extrapulmonary tuberculosis	http://www.ontobee.org/ontology/DOID?iri=http://purl.obolibrary.org/obo/DOID_0050598	2	10	0.115093	0.29619	FASLG;IL18
DOID:0050825	endocardium disease	http://www.ontobee.org/ontology/DOID?iri=http://purl.obolibrary.org/obo/DOID_0050825	2	10	0.115093	0.29619	ITGB3;MYH7
DOID:106	pleural tuberculosis	http://www.ontobee.org/ontology/DOID?iri=http://purl.obolibrary.org/obo/DOID_106	2	10	0.115093	0.29619	FASLG;IL18
DOID:12337	varicocele	http://www.ontobee.org/ontology/DOID?iri=http://purl.obolibrary.org/obo/DOID_12337	2	10	0.115093	0.29619	FASLG;TP53
DOID:13025	retinopathy of prematurity	http://www.ontobee.org/ontology/DOID?iri=http://purl.obolibrary.org/obo/DOID_13025	2	10	0.115093	0.29619	FZD4;IGF1R
DOID:2340	craniosynostosis	http://www.ontobee.org/ontology/DOID?iri=http://purl.obolibrary.org/obo/DOID_2340	2	10	0.115093	0.29619	IGF1R;KRAS
DOID:3663	cutaneous mastocytosis	http://www.ontobee.org/ontology/DOID?iri=http://purl.obolibrary.org/obo/DOID_3663	2	10	0.115093	0.29619	BCL2;BCL2L1
DOID:8437	intestinal obstruction	http://www.ontobee.org/ontology/DOID?iri=http://purl.obolibrary.org/obo/DOID_8437	2	10	0.115093	0.29619	FAS;SCN5A
DOID:8929	atrophic gastritis	http://www.ontobee.org/ontology/DOID?iri=http://purl.obolibrary.org/obo/DOID_8929	2	10	0.115093	0.29619	FAS;FASLG
DOID:9742	pelvic varices	http://www.ontobee.org/ontology/DOID?iri=http://purl.obolibrary.org/obo/DOID_9742	2	10	0.115093	0.29619	FASLG;TP53
DOID:3388	periodontal disease	http://www.ontobee.org/ontology/DOID?iri=http://purl.obolibrary.org/obo/DOID_3388	11	124	0.116397	0.298826	AGER;CASP3;CCL7;DMP1;EDN1;FCGR3B;IL10;IL13;IL18;MSN;S100A8
DOID:3458	breast adenocarcinoma	http://www.ontobee.org/ontology/DOID?iri=http://purl.obolibrary.org/obo/DOID_3458	5	44	0.116866	0.299312	ATF2;CCND1;EDN1;RB1;TP53
DOID:12716	newborn respiratory distress syndrome	http://www.ontobee.org/ontology/DOID?iri=http://purl.obolibrary.org/obo/DOID_12716	4	32	0.118371	0.30244	FAS;FASLG;IL10;MIF
DOID:3082	interstitial lung disease	http://www.ontobee.org/ontology/DOID?iri=http://purl.obolibrary.org/obo/DOID_3082	13	153	0.119877	0.305558	AGER;CCL21;CCND1;EDN1;FAS;FASLG;FCGR3B;IL10;IL13;IL18;MIF;SOCS1;YY1
DOID:1781	thyroid cancer	http://www.ontobee.org/ontology/DOID?iri=http://purl.obolibrary.org/obo/DOID_1781	16	197	0.122831	0.312342	BCL2;CCND1;CCR7;CD86;CDC25A;CDKN1A;FAS;IL10;KRAS;LBR;MMP11;NRAS;RAP1A;RB1;THBS1;TP53
DOID:11612	polycystic ovary syndrome	http://www.ontobee.org/ontology/DOID?iri=http://purl.obolibrary.org/obo/DOID_11612	13	154	0.124317	0.314226	ADIPOR2;ADRB2;CYP19A1;IL10;IL18;INSR;IRS2;ITGB3;KRAS;MIF;PRKAA2;TGFBR3;TNFRSF1B
DOID:13089	intracranial arterial disease	http://www.ontobee.org/ontology/DOID?iri=http://purl.obolibrary.org/obo/DOID_13089	3	21	0.124749	0.314226	CASP3;COL1A2;FBN2
DOID:3527	cerebral arterial disease	http://www.ontobee.org/ontology/DOID?iri=http://purl.obolibrary.org/obo/DOID_3527	3	21	0.124749	0.314226	CASP3;COL1A2;FBN2
DOID:5940	malignant peripheral nerve sheath tumor	http://www.ontobee.org/ontology/DOID?iri=http://purl.obolibrary.org/obo/DOID_5940	3	21	0.124749	0.314226	BMP5;SOX9;TP53
DOID:1398	parasitic infectious disease	http://www.ontobee.org/ontology/DOID?iri=http://purl.obolibrary.org/obo/DOID_1398	12	140	0.125519	0.315422	ADRB2;BCL2;CASP3;EDN1;FAS;FASLG;GYPC;IL10;IL13;IL18;MIF;TNFRSF1B
DOID:345	uterine disease	http://www.ontobee.org/ontology/DOID?iri=http://purl.obolibrary.org/obo/DOID_345	5	46	0.134373	0.336211	CCND1;CDKN1A;EDN1;IL10;RB1
DOID:13359	Ehlers-Danlos syndrome	http://www.ontobee.org/ontology/DOID?iri=http://purl.obolibrary.org/obo/DOID_13359	2	11	0.135366	0.336211	COL1A1;COL1A2
DOID:3429	inclusion body myositis	http://www.ontobee.org/ontology/DOID?iri=http://purl.obolibrary.org/obo/DOID_3429	2	11	0.135366	0.336211	TARDBP;THBS1
DOID:4724	brain edema	http://www.ontobee.org/ontology/DOID?iri=http://purl.obolibrary.org/obo/DOID_4724	2	11	0.135366	0.336211	AGER;EDN1
DOID:962	neurofibroma	http://www.ontobee.org/ontology/DOID?iri=http://purl.obolibrary.org/obo/DOID_962	2	11	0.135366	0.336211	SOX9;TP53
DOID:4914	esophagus adenocarcinoma	http://www.ontobee.org/ontology/DOID?iri=http://purl.obolibrary.org/obo/DOID_4914	3	22	0.138444	0.341473	FAS;KRAS;S100A2
DOID:631	fibromyalgia	http://www.ontobee.org/ontology/DOID?iri=http://purl.obolibrary.org/obo/DOID_631	3	22	0.138444	0.341473	ADRB2;ADRB3;IL10
DOID:9834	hyperopia	http://www.ontobee.org/ontology/DOID?iri=http://purl.obolibrary.org/obo/DOID_9834	3	22	0.138444	0.341473	BCL2;MMP11;PHOX2B
DOID:1923	sex differentiation disease	http://www.ontobee.org/ontology/DOID?iri=http://purl.obolibrary.org/obo/DOID_1923	4	34	0.139539	0.343381	CYP19A1;INSR;IRS2;TNFRSF1B
DOID:4606	bile duct cancer	http://www.ontobee.org/ontology/DOID?iri=http://purl.obolibrary.org/obo/DOID_4606	11	129	0.141847	0.347461	BCL2;CCND1;CDKN1A;DAPK1;DUSP1;FAS;FASLG;KRAS;NGF;SFN;TP53
DOID:4897	bile duct carcinoma	http://www.ontobee.org/ontology/DOID?iri=http://purl.obolibrary.org/obo/DOID_4897	11	129	0.141847	0.347461	BCL2;CCND1;CDKN1A;DAPK1;DUSP1;FAS;FASLG;KRAS;NGF;SFN;TP53
DOID:3459	breast carcinoma	http://www.ontobee.org/ontology/DOID?iri=http://purl.obolibrary.org/obo/DOID_3459	25	337	0.142273	0.347706	ADAM15;ADAMTS8;ATF2;BCL2;BTG2;CASP3;CCND1;CDKN1A;CHEK2;CYP19A1;DAPK1;EDN1;HOXA1;HSF1;IGF1R;ITGB3;KCNJ3;RB1;SFN;SOX2;TGFBR1;TNFRSF1B;TP53;ZEB2;ZFHX4
DOID:9119	acute myeloid leukemia	http://www.ontobee.org/ontology/DOID?iri=http://purl.obolibrary.org/obo/DOID_9119	9	101	0.143271	0.348413	BCL2;BCL2L1;CEBPD;FAS;IGF1R;KRAS;RAG1;RB1;RUNX1T1
DOID:8567	Hodgkin's lymphoma	http://www.ontobee.org/ontology/DOID?iri=http://purl.obolibrary.org/obo/DOID_8567	5	47	0.143541	0.348413	BCL2;CASP3;FAS;IL10;IL13
DOID:9415	allergic asthma	http://www.ontobee.org/ontology/DOID?iri=http://purl.obolibrary.org/obo/DOID_9415	5	47	0.143541	0.348413	EDN1;IL10;IL13;IL25;NGF
DOID:9408	acute myocardial infarction	http://www.ontobee.org/ontology/DOID?iri=http://purl.obolibrary.org/obo/DOID_9408	8	88	0.149178	0.361274	ADRB1;EDN1;IL10;ITGB3;OLR1;PAPPA;SOX2;TP53
DOID:2473	opportunistic mycosis	http://www.ontobee.org/ontology/DOID?iri=http://purl.obolibrary.org/obo/DOID_2473	4	35	0.150651	0.361563	FCGR3B;IL10;IL13;TNFRSF1B
DOID:255	hemangioma	http://www.ontobee.org/ontology/DOID?iri=http://purl.obolibrary.org/obo/DOID_255	4	35	0.150651	0.361563	CCND1;KRAS;PDGFB;TP53
DOID:349	systemic mastocytosis	http://www.ontobee.org/ontology/DOID?iri=http://purl.obolibrary.org/obo/DOID_349	4	35	0.150651	0.361563	ATP2A2;DUSP1;IL13;NRAS
DOID:3683	lung benign neoplasm	http://www.ontobee.org/ontology/DOID?iri=http://purl.obolibrary.org/obo/DOID_3683	4	35	0.150651	0.361563	BCL2;FAS;FASLG;KRAS
DOID:1588	thrombocytopenia	http://www.ontobee.org/ontology/DOID?iri=http://purl.obolibrary.org/obo/DOID_1588	6	61	0.151119	0.361872	ADAM12;FAS;FASLG;FCGR3B;IL18;ITGB3
DOID:13543	hyperparathyroidism	http://www.ontobee.org/ontology/DOID?iri=http://purl.obolibrary.org/obo/DOID_13543	3	23	0.152619	0.362911	CCND1;CDKN1A;COL1A1
DOID:0080005	bone remodeling disease	http://www.ontobee.org/ontology/DOID?iri=http://purl.obolibrary.org/obo/DOID_0080005	11	131	0.152793	0.362911	CCND1;COL1A1;CYP19A1;DMP1;IGF1R;IRS2;ITGB3;THBS1;TNFRSF1B;USP6;VAV3
DOID:4948	gallbladder carcinoma	http://www.ontobee.org/ontology/DOID?iri=http://purl.obolibrary.org/obo/DOID_4948	5	48	0.152972	0.362911	CCND1;FAS;FASLG;RB1;TP53
DOID:4896	bile duct adenocarcinoma	http://www.ontobee.org/ontology/DOID?iri=http://purl.obolibrary.org/obo/DOID_4896	10	117	0.154638	0.362911	BCL2;CCND1;DAPK1;DUSP1;FAS;FASLG;KRAS;NGF;SFN;TP53
DOID:4947	cholangiocarcinoma	http://www.ontobee.org/ontology/DOID?iri=http://purl.obolibrary.org/obo/DOID_4947	10	117	0.154638	0.362911	BCL2;CCND1;DAPK1;DUSP1;FAS;FASLG;KRAS;NGF;SFN;TP53
DOID:11266	hemorrhagic fever with renal syndrome	http://www.ontobee.org/ontology/DOID?iri=http://purl.obolibrary.org/obo/DOID_11266	2	12	0.156349	0.362911	ITGB3;THBS1
DOID:1884	viral hepatitis	http://www.ontobee.org/ontology/DOID?iri=http://purl.obolibrary.org/obo/DOID_1884	2	12	0.156349	0.362911	IL10;KCTD9
DOID:4305	bone giant cell tumor	http://www.ontobee.org/ontology/DOID?iri=http://purl.obolibrary.org/obo/DOID_4305	2	12	0.156349	0.362911	CCND1;TP53
DOID:4415	fibrous histiocytoma	http://www.ontobee.org/ontology/DOID?iri=http://purl.obolibrary.org/obo/DOID_4415	2	12	0.156349	0.362911	HBEGF;HMGA2
DOID:614	lymphopenia	http://www.ontobee.org/ontology/DOID?iri=http://purl.obolibrary.org/obo/DOID_614	2	12	0.156349	0.362911	BCL2L1;FAS
DOID:2021	placenta cancer	http://www.ontobee.org/ontology/DOID?iri=http://purl.obolibrary.org/obo/DOID_2021	4	36	0.162089	0.362911	CYP19A1;INSR;NR6A1;TP53
DOID:3594	choriocarcinoma	http://www.ontobee.org/ontology/DOID?iri=http://purl.obolibrary.org/obo/DOID_3594	4	36	0.162089	0.362911	CYP19A1;INSR;NR6A1;TP53
DOID:866	vein disease	http://www.ontobee.org/ontology/DOID?iri=http://purl.obolibrary.org/obo/DOID_866	4	36	0.162089	0.362911	FASLG;P2RX1;PCTP;TP53
DOID:2871	endometrial carcinoma	http://www.ontobee.org/ontology/DOID?iri=http://purl.obolibrary.org/obo/DOID_2871	7	76	0.162395	0.362911	BCL2;CCND1;FAS;IGF2BP3;KRAS;RB1;S100A8
DOID:3121	gallbladder cancer	http://www.ontobee.org/ontology/DOID?iri=http://purl.obolibrary.org/obo/DOID_3121	5	49	0.162654	0.362911	CCND1;FAS;FASLG;RB1;TP53
DOID:0060118	thoracic disease	http://www.ontobee.org/ontology/DOID?iri=http://purl.obolibrary.org/obo/DOID_0060118	3	24	0.167228	0.362911	BCL2;CYP19A1;ERCC4
DOID:3463	breast disease	http://www.ontobee.org/ontology/DOID?iri=http://purl.obolibrary.org/obo/DOID_3463	3	24	0.167228	0.362911	BCL2;CYP19A1;ERCC4
DOID:687	hepatoblastoma	http://www.ontobee.org/ontology/DOID?iri=http://purl.obolibrary.org/obo/DOID_687	3	24	0.167228	0.362911	CCND1;FASLG;TP53
DOID:0014667	disease of metabolism	http://www.ontobee.org/ontology/DOID?iri=http://purl.obolibrary.org/obo/DOID_0014667	65	978	0.167512	0.362911	ADIPOR2;ADRB1;ADRB2;ADRB3;AGER;ATP2A2;CAPN3;CCND1;CEBPD;CHEK2;CHUK;CLEC16A;CTNS;CYP19A1;DUSP1;EDN1;ENGASE;FAS;FASLG;GALE;GNPTAB;ICOS;IGF1R;IGF2BP2;IGF2BP3;IL10;IL13;IL18;INSR;IRS2;ISL1;ITGB3;IVD;KCNJ3;KCNMB1;KRAS;MAP3K1;MIF;MSN;OLR1;P2RX1;PAPPA;PBX1;PDX1;PKN2;PRKAA2;PRKAB2;PRKCZ;PTPRF;RB1;RDX;RORC;S100A8;SCD;SH2B3;SMO;SNAP23;SOCS1;SOX2;TAB2;TGFBR1;TGFBR3;TNFRSF1B;TP53;TSC1
DOID:10011	thyroid lymphoma	http://www.ontobee.org/ontology/DOID?iri=http://purl.obolibrary.org/obo/DOID_10011	1	3	0.167524	0.362911	CDC25A
DOID:1064	cystinosis	http://www.ontobee.org/ontology/DOID?iri=http://purl.obolibrary.org/obo/DOID_1064	1	3	0.167524	0.362911	CTNS
DOID:11198	DiGeorge syndrome	http://www.ontobee.org/ontology/DOID?iri=http://purl.obolibrary.org/obo/DOID_11198	1	3	0.167524	0.362911	TBX1
DOID:1210	optic neuritis	http://www.ontobee.org/ontology/DOID?iri=http://purl.obolibrary.org/obo/DOID_1210	1	3	0.167524	0.362911	ITGB3
DOID:12583	velocardiofacial syndrome	http://www.ontobee.org/ontology/DOID?iri=http://purl.obolibrary.org/obo/DOID_12583	1	3	0.167524	0.362911	TBX1
DOID:14115	toxic shock syndrome	http://www.ontobee.org/ontology/DOID?iri=http://purl.obolibrary.org/obo/DOID_14115	1	3	0.167524	0.362911	IL10
DOID:1577	limited scleroderma	http://www.ontobee.org/ontology/DOID?iri=http://purl.obolibrary.org/obo/DOID_1577	1	3	0.167524	0.362911	FAS
DOID:1837	diabetic ketoacidosis	http://www.ontobee.org/ontology/DOID?iri=http://purl.obolibrary.org/obo/DOID_1837	1	3	0.167524	0.362911	AGER
DOID:1866	giant cell reparative granuloma	http://www.ontobee.org/ontology/DOID?iri=http://purl.obolibrary.org/obo/DOID_1866	1	3	0.167524	0.362911	CCND1
DOID:2219	Glanzmann's thrombasthenia	http://www.ontobee.org/ontology/DOID?iri=http://purl.obolibrary.org/obo/DOID_2219	1	3	0.167524	0.362911	ITGB3
DOID:2347	generalized atherosclerosis	http://www.ontobee.org/ontology/DOID?iri=http://purl.obolibrary.org/obo/DOID_2347	1	3	0.167524	0.362911	ITGB3
DOID:2750	glycogen storage disease IV	http://www.ontobee.org/ontology/DOID?iri=http://purl.obolibrary.org/obo/DOID_2750	1	3	0.167524	0.362911	KCNJ3
DOID:297	pleomorphic adenoma carcinoma	http://www.ontobee.org/ontology/DOID?iri=http://purl.obolibrary.org/obo/DOID_297	1	3	0.167524	0.362911	CCND1
DOID:3540	choroid plexus cancer	http://www.ontobee.org/ontology/DOID?iri=http://purl.obolibrary.org/obo/DOID_3540	1	3	0.167524	0.362911	TP53
DOID:420	hypertrichosis	http://www.ontobee.org/ontology/DOID?iri=http://purl.obolibrary.org/obo/DOID_420	1	3	0.167524	0.362911	SOX9
DOID:4791	supratentorial primitive neuroectodermal tumor	http://www.ontobee.org/ontology/DOID?iri=http://purl.obolibrary.org/obo/DOID_4791	1	3	0.167524	0.362911	COL1A2
DOID:5052	melioidosis	http://www.ontobee.org/ontology/DOID?iri=http://purl.obolibrary.org/obo/DOID_5052	1	3	0.167524	0.362911	IL18
DOID:5522	basaloid squamous cell carcinoma	http://www.ontobee.org/ontology/DOID?iri=http://purl.obolibrary.org/obo/DOID_5522	1	3	0.167524	0.362911	TP53
DOID:5577	gastrinoma	http://www.ontobee.org/ontology/DOID?iri=http://purl.obolibrary.org/obo/DOID_5577	1	3	0.167524	0.362911	IGF1R
DOID:5715	functionless pituitary adenoma	http://www.ontobee.org/ontology/DOID?iri=http://purl.obolibrary.org/obo/DOID_5715	1	3	0.167524	0.362911	CCND1
DOID:668	myositis ossificans	http://www.ontobee.org/ontology/DOID?iri=http://purl.obolibrary.org/obo/DOID_668	1	3	0.167524	0.362911	USP6
DOID:676	juvenile rheumatoid arthritis	http://www.ontobee.org/ontology/DOID?iri=http://purl.obolibrary.org/obo/DOID_676	1	3	0.167524	0.362911	IL10
DOID:8483	retinal artery occlusion	http://www.ontobee.org/ontology/DOID?iri=http://purl.obolibrary.org/obo/DOID_8483	1	3	0.167524	0.362911	IL10
DOID:8568	infectious mononucleosis	http://www.ontobee.org/ontology/DOID?iri=http://purl.obolibrary.org/obo/DOID_8568	1	3	0.167524	0.362911	RAG1
DOID:8677	perinatal necrotizing enterocolitis	http://www.ontobee.org/ontology/DOID?iri=http://purl.obolibrary.org/obo/DOID_8677	1	3	0.167524	0.362911	MIF
DOID:8850	salivary gland cancer	http://www.ontobee.org/ontology/DOID?iri=http://purl.obolibrary.org/obo/DOID_8850	1	3	0.167524	0.362911	CCND1
DOID:9182	pemphigus	http://www.ontobee.org/ontology/DOID?iri=http://purl.obolibrary.org/obo/DOID_9182	1	3	0.167524	0.362911	IL10
DOID:9955	hypoplastic left heart syndrome	http://www.ontobee.org/ontology/DOID?iri=http://purl.obolibrary.org/obo/DOID_9955	1	3	0.167524	0.362911	EDN1
DOID:12449	aplastic anemia	http://www.ontobee.org/ontology/DOID?iri=http://purl.obolibrary.org/obo/DOID_12449	6	63	0.168172	0.363579	FASLG;IL10;ITGB3;MSN;PIGA;TP53
DOID:10652	Alzheimer's disease	http://www.ontobee.org/ontology/DOID?iri=http://purl.obolibrary.org/obo/DOID_10652	28	392	0.172044	0.370845	ADRB1;ADRB2;AGER;APBA1;BACE2;CASP3;CHEK2;CYP19A1;CYP46A1;DAPK1;DKK3;DYRK1A;FAS;FASLG;IL10;IL18;MIF;NEFM;OLR1;PPP3CA;SLC30A1;SLC30A4;SLC30A6;TARDBP;TNFRSF1B;TP53;TP73;VSNL1
DOID:11162	respiratory failure	http://www.ontobee.org/ontology/DOID?iri=http://purl.obolibrary.org/obo/DOID_11162	5	50	0.172575	0.370845	EDN1;FAS;FASLG;IL10;MIF
DOID:9835	refractive error	http://www.ontobee.org/ontology/DOID?iri=http://purl.obolibrary.org/obo/DOID_9835	5	50	0.172575	0.370845	BCL2;COL1A1;MMP11;PHOX2B;SOX2
DOID:10923	sickle cell anemia	http://www.ontobee.org/ontology/DOID?iri=http://purl.obolibrary.org/obo/DOID_10923	4	37	0.17383	0.372792	ARG2;IGF1R;IL18;SCD
DOID:1176	bronchial disease	http://www.ontobee.org/ontology/DOID?iri=http://purl.obolibrary.org/obo/DOID_1176	11	135	0.175934	0.376548	ADRB2;BCL2;BCL2L1;EDN1;IL10;IL13;IL18;IL25;ITGB3;KCNMB1;NGF
DOID:5844	myocardial infarction	http://www.ontobee.org/ontology/DOID?iri=http://purl.obolibrary.org/obo/DOID_5844	19	255	0.177839	0.378454	ADRB1;ADRB2;AGER;CLEC16A;EDN1;IL10;IL18;ITGB3;MIF;OLR1;PAPPA;PSMB8;SH2B3;SOX2;THBS1;TNFRSF1B;TP53;TRIB1;ZNF202
DOID:12689	acoustic neuroma	http://www.ontobee.org/ontology/DOID?iri=http://purl.obolibrary.org/obo/DOID_12689	2	13	0.177888	0.378454	CCND1;RB1
DOID:13533	osteopetrosis	http://www.ontobee.org/ontology/DOID?iri=http://purl.obolibrary.org/obo/DOID_13533	2	13	0.177888	0.378454	ITGB3;VAV3
DOID:1059	intellectual disability	http://www.ontobee.org/ontology/DOID?iri=http://purl.obolibrary.org/obo/DOID_1059	10	121	0.179401	0.380915	FKRP;GTF2I;HDAC4;HOXA1;NRGN;POMT1;SMC1A;TP53;ZEB2;ZFYVE26
DOID:11201	parathyroid gland disease	http://www.ontobee.org/ontology/DOID?iri=http://purl.obolibrary.org/obo/DOID_11201	3	25	0.182225	0.385378	CCND1;CDKN1A;COL1A1
DOID:9446	cholangitis	http://www.ontobee.org/ontology/DOID?iri=http://purl.obolibrary.org/obo/DOID_9446	3	25	0.182225	0.385378	FAS;ICOS;TP53
DOID:1307	dementia	http://www.ontobee.org/ontology/DOID?iri=http://purl.obolibrary.org/obo/DOID_1307	31	442	0.182942	0.386131	ADRB1;ADRB2;AGER;APBA1;BACE2;BCL2;CASP3;CHEK2;CYP19A1;CYP46A1;DAPK1;DKK3;DYRK1A;FAS;FASLG;IL10;IL18;KLK10;MIF;NEFM;OLR1;PPP3CA;SLC30A1;SLC30A4;SLC30A6;TARDBP;THBS1;TNFRSF1B;TP53;TP73;VSNL1
DOID:3498	pancreatic ductal adenocarcinoma	http://www.ontobee.org/ontology/DOID?iri=http://purl.obolibrary.org/obo/DOID_3498	8	93	0.184896	0.388997	EPHA4;HMGA1;HMGA2;IGF2BP3;KLK10;KRAS;PRKCZ;TP53
DOID:1040	chronic lymphocytic leukemia	http://www.ontobee.org/ontology/DOID?iri=http://purl.obolibrary.org/obo/DOID_1040	14	181	0.185029	0.388997	BCL2;BCL2L1;CCL21;CCND1;CHEK2;CXCR5;DAPK1;FAS;FASLG;PDGFB;PEG10;PMAIP1;RAP1GDS1;TP53
DOID:0050136	systemic mycosis	http://www.ontobee.org/ontology/DOID?iri=http://purl.obolibrary.org/obo/DOID_0050136	4	38	0.185854	0.389818	FCGR3B;IL10;IL13;TNFRSF1B
DOID:680	tauopathy	http://www.ontobee.org/ontology/DOID?iri=http://purl.obolibrary.org/obo/DOID_680	28	396	0.186149	0.389818	ADRB1;ADRB2;AGER;APBA1;BACE2;CASP3;CHEK2;CYP19A1;CYP46A1;DAPK1;DKK3;DYRK1A;FAS;FASLG;IL10;IL18;MIF;NEFM;OLR1;PPP3CA;SLC30A1;SLC30A4;SLC30A6;TARDBP;TNFRSF1B;TP53;TP73;VSNL1
DOID:824	periodontitis	http://www.ontobee.org/ontology/DOID?iri=http://purl.obolibrary.org/obo/DOID_824	9	108	0.189431	0.395914	AGER;CASP3;CCL7;DMP1;FCGR3B;IL10;IL13;IL18;S100A8
DOID:635	acquired immunodeficiency syndrome	http://www.ontobee.org/ontology/DOID?iri=http://purl.obolibrary.org/obo/DOID_635	6	66	0.19517	0.407112	BCL2;FAS;FASLG;IL10;IL18;TP53
DOID:2513	basal cell carcinoma	http://www.ontobee.org/ontology/DOID?iri=http://purl.obolibrary.org/obo/DOID_2513	3	26	0.197563	0.411301	IGF1R;MYCN;SMO
DOID:8466	retinal degeneration	http://www.ontobee.org/ontology/DOID?iri=http://purl.obolibrary.org/obo/DOID_8466	16	214	0.199679	0.413428	ADRB1;ADRB2;BCL2;BCL2L1;CASP3;CDKN1A;CYP46A1;EDN1;ELOVL4;FAS;FASLG;FBLN5;IMPG2;SMC1A;TP53;VAV3
DOID:2526	prostate adenocarcinoma	http://www.ontobee.org/ontology/DOID?iri=http://purl.obolibrary.org/obo/DOID_2526	2	14	0.199843	0.413428	KRAS;SCD
DOID:4851	pilocytic astrocytoma	http://www.ontobee.org/ontology/DOID?iri=http://purl.obolibrary.org/obo/DOID_4851	2	14	0.199843	0.413428	KRAS;TP53
DOID:289	endometriosis	http://www.ontobee.org/ontology/DOID?iri=http://purl.obolibrary.org/obo/DOID_289	8	95	0.200133	0.413428	CCND1;CDKN1A;FASLG;IL10;IL18;KRAS;MIF;RB1
DOID:26	pancreas disease	http://www.ontobee.org/ontology/DOID?iri=http://purl.obolibrary.org/obo/DOID_26	12	154	0.201397	0.415131	AGER;EDN1;HSF1;IL10;IL18;INSR;KRAS;MIF;NRAS;PDGFB;PPP3CA;PRKCZ
DOID:865	vasculitis	http://www.ontobee.org/ontology/DOID?iri=http://purl.obolibrary.org/obo/DOID_865	9	110	0.203697	0.415131	CCL21;CDH5;FCGR3B;IL10;IL18;ITGB3;MIF;RORC;TNFRSF1B
DOID:3963	thyroid carcinoma	http://www.ontobee.org/ontology/DOID?iri=http://purl.obolibrary.org/obo/DOID_3963	14	185	0.20682	0.415131	BCL2;CCND1;CCR7;CD86;CDKN1A;FAS;KRAS;LBR;MMP11;NRAS;RAP1A;RB1;THBS1;TP53
DOID:688	embryonal cancer	http://www.ontobee.org/ontology/DOID?iri=http://purl.obolibrary.org/obo/DOID_688	24	339	0.207036	0.415131	AEN;AIFM1;BCL2;BCL2L1;CCND1;CDKN1A;FAS;FASLG;HSF1;IGF1R;IL10;IL18;ITGB3;KRAS;MEF2D;MTUS1;PHOX2B;PRDM1;RB1;RRM2;S100A2;SOX2;VAV3;ZNF202
DOID:10286	prostate carcinoma	http://www.ontobee.org/ontology/DOID?iri=http://purl.obolibrary.org/obo/DOID_10286	9	111	0.210993	0.415131	BCL2;COL1A1;CYP19A1;IGF1R;KRAS;MIF;S100A8;SCD;TP53
DOID:657	adenoma	http://www.ontobee.org/ontology/DOID?iri=http://purl.obolibrary.org/obo/DOID_657	22	309	0.211974	0.415131	AHR;AIFM1;BCL2;CASP3;CCND1;CDKN1A;EDN1;FAS;FASLG;GHR;HMGA1;HMGA2;IL10;KRAS;MIF;RB1;SKIL;SNAP23;SOCS1;THBS1;THRA;TP53
DOID:4798	aggressive systemic mastocytosis	http://www.ontobee.org/ontology/DOID?iri=http://purl.obolibrary.org/obo/DOID_4798	3	27	0.213199	0.415131	ATP2A2;DUSP1;IL13
DOID:0060084	cell type benign neoplasm	http://www.ontobee.org/ontology/DOID?iri=http://purl.obolibrary.org/obo/DOID_0060084	30	435	0.214004	0.415131	AHR;AIFM1;BCL2;CASP3;CCND1;CDKN1A;COL1A1;COL4A6;CYP19A1;DAPK1;EDN1;FAS;FASLG;GHR;HMGA1;HMGA2;IGF1R;IL10;KRAS;MIF;OPN3;PDGFB;RB1;SKIL;SNAP23;SOCS1;SOX9;THBS1;THRA;TP53
DOID:10020	ampulla of Vater cancer	http://www.ontobee.org/ontology/DOID?iri=http://purl.obolibrary.org/obo/DOID_10020	1	4	0.216894	0.415131	SOX2
DOID:10021	duodenum cancer	http://www.ontobee.org/ontology/DOID?iri=http://purl.obolibrary.org/obo/DOID_10021	1	4	0.216894	0.415131	SOX2
DOID:10485	esophageal atresia	http://www.ontobee.org/ontology/DOID?iri=http://purl.obolibrary.org/obo/DOID_10485	1	4	0.216894	0.415131	SOX2
DOID:11104	spotted fever	http://www.ontobee.org/ontology/DOID?iri=http://purl.obolibrary.org/obo/DOID_11104	1	4	0.216894	0.415131	IL10
DOID:11200	T cell deficiency	http://www.ontobee.org/ontology/DOID?iri=http://purl.obolibrary.org/obo/DOID_11200	1	4	0.216894	0.415131	TBX1
DOID:12215	oligohydramnios	http://www.ontobee.org/ontology/DOID?iri=http://purl.obolibrary.org/obo/DOID_12215	1	4	0.216894	0.415131	EDN1
DOID:12662	paracoccidioidomycosis	http://www.ontobee.org/ontology/DOID?iri=http://purl.obolibrary.org/obo/DOID_12662	1	4	0.216894	0.415131	IL10
DOID:12721	multiple epiphyseal dysplasia	http://www.ontobee.org/ontology/DOID?iri=http://purl.obolibrary.org/obo/DOID_12721	1	4	0.216894	0.415131	COL9A1
DOID:13372	alpha 1-antitrypsin deficiency	http://www.ontobee.org/ontology/DOID?iri=http://purl.obolibrary.org/obo/DOID_13372	1	4	0.216894	0.415131	IL10
DOID:14095	boutonneuse fever	http://www.ontobee.org/ontology/DOID?iri=http://purl.obolibrary.org/obo/DOID_14095	1	4	0.216894	0.415131	IL10
DOID:14654	prostatitis	http://www.ontobee.org/ontology/DOID?iri=http://purl.obolibrary.org/obo/DOID_14654	1	4	0.216894	0.415131	IL10
DOID:14686	Axenfeld-Rieger syndrome	http://www.ontobee.org/ontology/DOID?iri=http://purl.obolibrary.org/obo/DOID_14686	1	4	0.216894	0.415131	COL1A1
DOID:1529	penile disease	http://www.ontobee.org/ontology/DOID?iri=http://purl.obolibrary.org/obo/DOID_1529	1	4	0.216894	0.415131	ITGB3
DOID:216	dental caries	http://www.ontobee.org/ontology/DOID?iri=http://purl.obolibrary.org/obo/DOID_216	1	4	0.216894	0.415131	IL18
DOID:2297	leptospirosis	http://www.ontobee.org/ontology/DOID?iri=http://purl.obolibrary.org/obo/DOID_2297	1	4	0.216894	0.415131	IL10
DOID:285	hairy cell leukemia	http://www.ontobee.org/ontology/DOID?iri=http://purl.obolibrary.org/obo/DOID_285	1	4	0.216894	0.415131	CCND1
DOID:2862	glucosephosphate dehydrogenase deficiency	http://www.ontobee.org/ontology/DOID?iri=http://purl.obolibrary.org/obo/DOID_2862	1	4	0.216894	0.415131	IL10
DOID:3112	papillary adenocarcinoma	http://www.ontobee.org/ontology/DOID?iri=http://purl.obolibrary.org/obo/DOID_3112	1	4	0.216894	0.415131	KRAS
DOID:3168	squamous cell neoplasm	http://www.ontobee.org/ontology/DOID?iri=http://purl.obolibrary.org/obo/DOID_3168	1	4	0.216894	0.415131	TP53
DOID:3305	teratocarcinoma	http://www.ontobee.org/ontology/DOID?iri=http://purl.obolibrary.org/obo/DOID_3305	1	4	0.216894	0.415131	PBX2
DOID:3306	mixed germ cell cancer	http://www.ontobee.org/ontology/DOID?iri=http://purl.obolibrary.org/obo/DOID_3306	1	4	0.216894	0.415131	PBX2
DOID:3840	craniopharyngioma	http://www.ontobee.org/ontology/DOID?iri=http://purl.obolibrary.org/obo/DOID_3840	1	4	0.216894	0.415131	IGF1R
DOID:4310	smooth muscle tumor	http://www.ontobee.org/ontology/DOID?iri=http://purl.obolibrary.org/obo/DOID_4310	1	4	0.216894	0.415131	BCL2
DOID:4552	large cell carcinoma	http://www.ontobee.org/ontology/DOID?iri=http://purl.obolibrary.org/obo/DOID_4552	1	4	0.216894	0.415131	KRAS
DOID:4926	bronchiolo-alveolar adenocarcinoma	http://www.ontobee.org/ontology/DOID?iri=http://purl.obolibrary.org/obo/DOID_4926	1	4	0.216894	0.415131	KRAS
DOID:4932	ampulla of Vater carcinoma	http://www.ontobee.org/ontology/DOID?iri=http://purl.obolibrary.org/obo/DOID_4932	1	4	0.216894	0.415131	SOX2
DOID:4959	epidermolysis bullosa dystrophica	http://www.ontobee.org/ontology/DOID?iri=http://purl.obolibrary.org/obo/DOID_4959	1	4	0.216894	0.415131	COL1A1
DOID:6612	leukocyte adhesion deficiency	http://www.ontobee.org/ontology/DOID?iri=http://purl.obolibrary.org/obo/DOID_6612	1	4	0.216894	0.415131	RAP1A
DOID:6688	autoimmune lymphoproliferative syndrome	http://www.ontobee.org/ontology/DOID?iri=http://purl.obolibrary.org/obo/DOID_6688	1	4	0.216894	0.415131	FAS
DOID:7607	chief cell adenoma	http://www.ontobee.org/ontology/DOID?iri=http://purl.obolibrary.org/obo/DOID_7607	1	4	0.216894	0.415131	SNAP23
DOID:8527	monocytic leukemia	http://www.ontobee.org/ontology/DOID?iri=http://purl.obolibrary.org/obo/DOID_8527	1	4	0.216894	0.415131	CDKN1A
DOID:8536	herpes zoster	http://www.ontobee.org/ontology/DOID?iri=http://purl.obolibrary.org/obo/DOID_8536	1	4	0.216894	0.415131	IL10
DOID:9164	achalasia	http://www.ontobee.org/ontology/DOID?iri=http://purl.obolibrary.org/obo/DOID_9164	1	4	0.216894	0.415131	ATP2A2
DOID:0050743	mature T-cell and NK-cell lymphoma	http://www.ontobee.org/ontology/DOID?iri=http://purl.obolibrary.org/obo/DOID_0050743	2	15	0.22209	0.418328	CCL21;FAS
DOID:0050749	peripheral T-cell lymphoma	http://www.ontobee.org/ontology/DOID?iri=http://purl.obolibrary.org/obo/DOID_0050749	2	15	0.22209	0.418328	CCL21;FAS
DOID:0060061	cutaneous T cell lymphoma	http://www.ontobee.org/ontology/DOID?iri=http://purl.obolibrary.org/obo/DOID_0060061	2	15	0.22209	0.418328	CCL21;FAS
DOID:0060101	benign glioma	http://www.ontobee.org/ontology/DOID?iri=http://purl.obolibrary.org/obo/DOID_0060101	2	15	0.22209	0.418328	CCND1;SOX9
DOID:13564	aspergillosis	http://www.ontobee.org/ontology/DOID?iri=http://purl.obolibrary.org/obo/DOID_13564	2	15	0.22209	0.418328	IL10;TNFRSF1B
DOID:2957	pulmonary tuberculosis	http://www.ontobee.org/ontology/DOID?iri=http://purl.obolibrary.org/obo/DOID_2957	2	15	0.22209	0.418328	IL10;IL18
DOID:3319	lymphangioleiomyomatosis	http://www.ontobee.org/ontology/DOID?iri=http://purl.obolibrary.org/obo/DOID_3319	2	15	0.22209	0.418328	HMGA2;TSC1
DOID:47	prostate disease	http://www.ontobee.org/ontology/DOID?iri=http://purl.obolibrary.org/obo/DOID_47	2	15	0.22209	0.418328	CYP19A1;IL10
DOID:4844	benign ependymoma	http://www.ontobee.org/ontology/DOID?iri=http://purl.obolibrary.org/obo/DOID_4844	2	15	0.22209	0.418328	CCND1;SOX9
DOID:10603	glucose intolerance	http://www.ontobee.org/ontology/DOID?iri=http://purl.obolibrary.org/obo/DOID_10603	4	41	0.2234	0.419512	AGER;INSR;PRKCZ;TNFRSF1B
DOID:3744	cervical squamous cell carcinoma	http://www.ontobee.org/ontology/DOID?iri=http://purl.obolibrary.org/obo/DOID_3744	6	69	0.223669	0.419512	ATP2A2;BCL2;CCND1;CDKN1A;FAS;RB1
DOID:11054	urinary bladder cancer	http://www.ontobee.org/ontology/DOID?iri=http://purl.obolibrary.org/obo/DOID_11054	8	98	0.223897	0.419512	CASP5;CCND1;CDKN1A;FASLG;IL13;RALB;RB1;TP53
DOID:1967	leiomyosarcoma	http://www.ontobee.org/ontology/DOID?iri=http://purl.obolibrary.org/obo/DOID_1967	3	28	0.229088	0.426247	BCL2;CCND1;RB1
DOID:3193	peripheral nerve sheath neoplasm	http://www.ontobee.org/ontology/DOID?iri=http://purl.obolibrary.org/obo/DOID_3193	3	28	0.229088	0.426247	BMP5;SOX9;TP53
DOID:4230	smooth muscle cancer	http://www.ontobee.org/ontology/DOID?iri=http://purl.obolibrary.org/obo/DOID_4230	3	28	0.229088	0.426247	BCL2;CCND1;RB1
DOID:4610	intestinal benign neoplasm	http://www.ontobee.org/ontology/DOID?iri=http://purl.obolibrary.org/obo/DOID_4610	3	28	0.229088	0.426247	BCL2;BCL2L1;KRAS
DOID:0050117	disease by infectious agent	http://www.ontobee.org/ontology/DOID?iri=http://purl.obolibrary.org/obo/DOID_0050117	55	841	0.230352	0.427853	ADIPOR2;ADRB2;BCL2;BCL2L1;BCL7A;CASP3;CCL21;CCR7;CD86;CDH5;CDKN1A;CHEK2;CHFR;COIL;CPSF4;CRK;CXCR5;DNAJB1;EDN1;ELF4;FAS;FASLG;FCGR3B;GYPC;HBEGF;ICOS;IL10;IL13;IL18;IRS2;ITGB3;KCTD9;KPNA1;KRAS;MIF;NRAS;NXF1;PIAS4;PMAIP1;PRDM1;PSMB8;PTAFR;RAG1;RAP1A;RB1;S100A8;SOCS1;THBS1;TMPRSS2;TNFRSF1B;TNFSF9;TP53;TP73;UBE2I;YY1
DOID:2893	cervix carcinoma	http://www.ontobee.org/ontology/DOID?iri=http://purl.obolibrary.org/obo/DOID_2893	8	99	0.232041	0.430244	ATP2A2;BCL2;CCND1;CDKN1A;FAS;KRAS;RB1;TP53
DOID:1240	leukemia	http://www.ontobee.org/ontology/DOID?iri=http://purl.obolibrary.org/obo/DOID_1240	63	973	0.235693	0.436257	ADRB2;AFF1;AHR;ARID3A;BCL2;BCL2L1;CASP3;CCL21;CCND1;CCR7;CD86;CDK6;CDKN1A;CEBPD;CHEK2;CHUK;COIL;CRMP1;CXCR5;CYP19A1;DAPK1;EIF4G2;ELF4;EPHA3;FAS;FASLG;FZD4;HMGA1;HMGA2;IDH2;IGF1R;IL10;IL18;KRAS;MIF;MLLT10;MXD1;MYCN;NGF;NRAS;PBX1;PBX2;PDGFB;PEG10;PIAS4;PMAIP1;PRKAR2A;PTAFR;RAG1;RAP1GDS1;RB1;RUNX1T1;SMC1A;SOCS1;TET3;TLX3;TNFSF9;TP53;TP73;UGCG;YWHAH;ZBTB16;ZNF451
DOID:4362	cervical cancer	http://www.ontobee.org/ontology/DOID?iri=http://purl.obolibrary.org/obo/DOID_4362	8	100	0.240289	0.443227	ATP2A2;BCL2;CCND1;CDKN1A;FAS;KRAS;RB1;TP53
DOID:552	pneumonia	http://www.ontobee.org/ontology/DOID?iri=http://purl.obolibrary.org/obo/DOID_552	8	100	0.240289	0.443227	CCL21;CCND1;COL1A1;IL10;IL13;IL18;MIF;TP53
DOID:229	female reproductive system disease	http://www.ontobee.org/ontology/DOID?iri=http://purl.obolibrary.org/obo/DOID_229	13	176	0.243687	0.447237	ACSL6;CCND1;CDKN1A;CYP19A1;EDN1;FASLG;IL10;IL18;KRAS;MIF;PGRMC1;RB1;TGFBR3
DOID:14791	Leber congenital amaurosis	http://www.ontobee.org/ontology/DOID?iri=http://purl.obolibrary.org/obo/DOID_14791	2	16	0.244517	0.447237	ELOVL4;IQCB1
DOID:2615	papilloma	http://www.ontobee.org/ontology/DOID?iri=http://purl.obolibrary.org/obo/DOID_2615	2	16	0.244517	0.447237	BCL2;TP53
DOID:3490	Noonan syndrome	http://www.ontobee.org/ontology/DOID?iri=http://purl.obolibrary.org/obo/DOID_3490	2	16	0.244517	0.447237	KRAS;NRAS
DOID:10316	pneumoconiosis	http://www.ontobee.org/ontology/DOID?iri=http://purl.obolibrary.org/obo/DOID_10316	3	29	0.245189	0.447237	FAS;FASLG;IL10
DOID:5426	premature ovarian failure	http://www.ontobee.org/ontology/DOID?iri=http://purl.obolibrary.org/obo/DOID_5426	3	29	0.245189	0.447237	ACSL6;PGRMC1;TGFBR3
DOID:12930	dilated cardiomyopathy	http://www.ontobee.org/ontology/DOID?iri=http://purl.obolibrary.org/obo/DOID_12930	7	86	0.247019	0.447237	ADRB1;ADRB2;FAS;FKRP;MYH7;SCN5A;TP53
DOID:9452	fatty liver disease	http://www.ontobee.org/ontology/DOID?iri=http://purl.obolibrary.org/obo/DOID_9452	7	86	0.247019	0.447237	ADIPOR2;ADRB2;AGER;FAS;IL10;MIF;SCD
DOID:12306	vitiligo	http://www.ontobee.org/ontology/DOID?iri=http://purl.obolibrary.org/obo/DOID_12306	5	57	0.247658	0.447237	EDN1;FAS;IL10;PSMB8;TP53
DOID:2277	gonadal disease	http://www.ontobee.org/ontology/DOID?iri=http://purl.obolibrary.org/obo/DOID_2277	5	57	0.247658	0.447237	CHD7;CYP19A1;INSR;IRS2;TNFRSF1B
DOID:4007	bladder carcinoma	http://www.ontobee.org/ontology/DOID?iri=http://purl.obolibrary.org/obo/DOID_4007	5	57	0.247658	0.447237	CASP5;CCND1;FASLG;IL13;TP53
DOID:750	peptic ulcer disease	http://www.ontobee.org/ontology/DOID?iri=http://purl.obolibrary.org/obo/DOID_750	5	57	0.247658	0.447237	EDN1;IL10;ITGB3;MIF;TP53
DOID:0050828	artery disease	http://www.ontobee.org/ontology/DOID?iri=http://purl.obolibrary.org/obo/DOID_0050828	55	847	0.247906	0.447237	ADAM12;ADAM15;ADIPOR2;ADRB1;ADRB2;ADRB3;AGER;AHR;ARG2;ATP2A2;CASP3;CD86;CHEK2;CLEC16A;COL1A2;CYP19A1;EDN1;FAS;FASLG;FBLN5;FBN2;GHR;HAS2;HBEGF;ICOS;IGF1R;IL10;IL18;INSR;ITGB3;KCNMB1;LYVE1;MIF;NGF;OLR1;PAPPA;PDGFB;PLA2G3;PRKCZ;PSMB8;PTPRU;S100A8;SCD;SH2B3;SOCS1;SOX2;TGFBR1;TGFBR3;THBS1;TNFRSF1B;TP53;TRIB1;YWHAZ;YY1;ZNF202
DOID:3113	papillary carcinoma	http://www.ontobee.org/ontology/DOID?iri=http://purl.obolibrary.org/obo/DOID_3113	4	43	0.24944	0.448567	CASP3;CD86;KLK10;SFN
DOID:193	reproductive organ cancer	http://www.ontobee.org/ontology/DOID?iri=http://purl.obolibrary.org/obo/DOID_193	45	686	0.251875	0.448567	ADIPOR2;AIFM1;ARG2;ATP2A2;BCL2;BCL2L1;CASP3;CCND1;CDKN1A;CEBPD;CHEK2;COL1A1;CYP19A1;DUSP1;E2F5;EDN1;FAS;FASLG;HAS2;HBEGF;IGF1R;IGF2BP3;IL10;IL13;IL18;INSR;ITGB3;KRAS;LIN28A;MAP3K1;MDM4;MIF;NR6A1;PBX1;PDX1;PRKCZ;RB1;S100A8;SCD;SFN;THBS1;TNFRSF1B;TP53;VAV3;YWHAZ
DOID:1247	blood coagulation disease	http://www.ontobee.org/ontology/DOID?iri=http://purl.obolibrary.org/obo/DOID_1247	12	162	0.25221	0.448567	ADAM12;BCL2L1;CASP3;CD86;EDN1;FAS;FASLG;FCGR3B;IDH2;IL18;ITGB3;THBS1
DOID:0070004	myeloma	http://www.ontobee.org/ontology/DOID?iri=http://purl.obolibrary.org/obo/DOID_0070004	20	287	0.255596	0.448567	BCL2;BCL2L1;CCND1;COL1A1;FASLG;FCGR3B;HMGA2;IDH2;IGF1R;IL10;ITGB3;KRAS;NRAS;PDGFB;PMAIP1;PRDM1;SOCS1;THBS1;TNFSF9;TP53
DOID:1380	endometrial cancer	http://www.ontobee.org/ontology/DOID?iri=http://purl.obolibrary.org/obo/DOID_1380	7	87	0.256166	0.448567	BCL2;CCND1;FAS;IGF2BP3;KRAS;RB1;S100A8
DOID:4607	biliary tract cancer	http://www.ontobee.org/ontology/DOID?iri=http://purl.obolibrary.org/obo/DOID_4607	12	163	0.258874	0.448567	BCL2;CCND1;CDKN1A;DAPK1;DUSP1;FAS;FASLG;KRAS;NGF;RB1;SFN;TP53
DOID:0060159	organic acidemia	http://www.ontobee.org/ontology/DOID?iri=http://purl.obolibrary.org/obo/DOID_0060159	1	5	0.263344	0.448567	IVD
DOID:10632	Wolfram syndrome	http://www.ontobee.org/ontology/DOID?iri=http://purl.obolibrary.org/obo/DOID_10632	1	5	0.263344	0.448567	CRMP1
DOID:10966	lipoid nephrosis	http://www.ontobee.org/ontology/DOID?iri=http://purl.obolibrary.org/obo/DOID_10966	1	5	0.263344	0.448567	IL18
DOID:11193	syndactyly	http://www.ontobee.org/ontology/DOID?iri=http://purl.obolibrary.org/obo/DOID_11193	1	5	0.263344	0.448567	ROR2
DOID:11405	diphtheria	http://www.ontobee.org/ontology/DOID?iri=http://purl.obolibrary.org/obo/DOID_11405	1	5	0.263344	0.448567	HBEGF
DOID:11719	oculopharyngeal muscular dystrophy	http://www.ontobee.org/ontology/DOID?iri=http://purl.obolibrary.org/obo/DOID_11719	1	5	0.263344	0.448567	BCL2
DOID:11727	facioscapulohumeral muscular dystrophy	http://www.ontobee.org/ontology/DOID?iri=http://purl.obolibrary.org/obo/DOID_11727	1	5	0.263344	0.448567	SLC25A4
DOID:12287	Crimean-Congo hemorrhagic fever	http://www.ontobee.org/ontology/DOID?iri=http://purl.obolibrary.org/obo/DOID_12287	1	5	0.263344	0.448567	CASP3
DOID:12785	diabetic polyneuropathy	http://www.ontobee.org/ontology/DOID?iri=http://purl.obolibrary.org/obo/DOID_12785	1	5	0.263344	0.448567	SLC25A4
DOID:1762	cheilitis	http://www.ontobee.org/ontology/DOID?iri=http://purl.obolibrary.org/obo/DOID_1762	1	5	0.263344	0.448567	TP53
DOID:1863	skull cancer	http://www.ontobee.org/ontology/DOID?iri=http://purl.obolibrary.org/obo/DOID_1863	1	5	0.263344	0.448567	IGF1R
DOID:2691	myoma	http://www.ontobee.org/ontology/DOID?iri=http://purl.obolibrary.org/obo/DOID_2691	1	5	0.263344	0.448567	CDKN1A
DOID:3144	cutis laxa	http://www.ontobee.org/ontology/DOID?iri=http://purl.obolibrary.org/obo/DOID_3144	1	5	0.263344	0.448567	FBLN5
DOID:3643	sella turcica neoplasm	http://www.ontobee.org/ontology/DOID?iri=http://purl.obolibrary.org/obo/DOID_3643	1	5	0.263344	0.448567	IGF1R
DOID:3669	intermittent claudication	http://www.ontobee.org/ontology/DOID?iri=http://purl.obolibrary.org/obo/DOID_3669	1	5	0.263344	0.448567	IL10
DOID:3842	skull base neoplasm	http://www.ontobee.org/ontology/DOID?iri=http://purl.obolibrary.org/obo/DOID_3842	1	5	0.263344	0.448567	IGF1R
DOID:3950	adrenal carcinoma	http://www.ontobee.org/ontology/DOID?iri=http://purl.obolibrary.org/obo/DOID_3950	1	5	0.263344	0.448567	CCND1
DOID:4006	bladder transitional cell carcinoma	http://www.ontobee.org/ontology/DOID?iri=http://purl.obolibrary.org/obo/DOID_4006	1	5	0.263344	0.448567	FASLG
DOID:4235	spindle cell sarcoma	http://www.ontobee.org/ontology/DOID?iri=http://purl.obolibrary.org/obo/DOID_4235	1	5	0.263344	0.448567	MYCN
DOID:5078	ganglioglioma	http://www.ontobee.org/ontology/DOID?iri=http://purl.obolibrary.org/obo/DOID_5078	1	5	0.263344	0.448567	TP53
DOID:705	leber hereditary optic neuropathy	http://www.ontobee.org/ontology/DOID?iri=http://purl.obolibrary.org/obo/DOID_705	1	5	0.263344	0.448567	TP53
DOID:8488	polyhydramnios	http://www.ontobee.org/ontology/DOID?iri=http://purl.obolibrary.org/obo/DOID_8488	1	5	0.263344	0.448567	EDN1
DOID:8538	reticulosarcoma	http://www.ontobee.org/ontology/DOID?iri=http://purl.obolibrary.org/obo/DOID_8538	1	5	0.263344	0.448567	CASP3
DOID:8618	oral cavity cancer	http://www.ontobee.org/ontology/DOID?iri=http://purl.obolibrary.org/obo/DOID_8618	1	5	0.263344	0.448567	CCND1
DOID:9146	visceral leishmaniasis	http://www.ontobee.org/ontology/DOID?iri=http://purl.obolibrary.org/obo/DOID_9146	1	5	0.263344	0.448567	IL10
DOID:929	myopathy of extraocular muscle	http://www.ontobee.org/ontology/DOID?iri=http://purl.obolibrary.org/obo/DOID_929	1	5	0.263344	0.448567	BCL2
DOID:9297	lip disease	http://www.ontobee.org/ontology/DOID?iri=http://purl.obolibrary.org/obo/DOID_9297	1	5	0.263344	0.448567	TP53
DOID:930	orbital disease	http://www.ontobee.org/ontology/DOID?iri=http://purl.obolibrary.org/obo/DOID_930	1	5	0.263344	0.448567	BCL2
DOID:9870	galactosemia	http://www.ontobee.org/ontology/DOID?iri=http://purl.obolibrary.org/obo/DOID_9870	1	5	0.263344	0.448567	GALE
DOID:2789	parasitic protozoa infectious disease	http://www.ontobee.org/ontology/DOID?iri=http://purl.obolibrary.org/obo/DOID_2789	9	118	0.264749	0.450242	ADRB2;EDN1;FAS;FASLG;GYPC;IL10;IL18;MIF;TNFRSF1B
DOID:363	uterine cancer	http://www.ontobee.org/ontology/DOID?iri=http://purl.obolibrary.org/obo/DOID_363	7	88	0.265412	0.450526	BCL2;CCND1;FAS;IGF2BP3;KRAS;RB1;S100A8
DOID:12140	Chagas disease	http://www.ontobee.org/ontology/DOID?iri=http://purl.obolibrary.org/obo/DOID_12140	2	17	0.267025	0.450526	IL10;MIF
DOID:1852	intrahepatic cholestasis	http://www.ontobee.org/ontology/DOID?iri=http://purl.obolibrary.org/obo/DOID_1852	2	17	0.267025	0.450526	EDN1;TP53
DOID:8923	skin melanoma	http://www.ontobee.org/ontology/DOID?iri=http://purl.obolibrary.org/obo/DOID_8923	2	17	0.267025	0.450526	CASP3;CDKN1A
DOID:9206	Barrett's esophagus	http://www.ontobee.org/ontology/DOID?iri=http://purl.obolibrary.org/obo/DOID_9206	2	17	0.267025	0.450526	IGF2BP3;SKIL
DOID:913	atrophic muscular disease	http://www.ontobee.org/ontology/DOID?iri=http://purl.obolibrary.org/obo/DOID_913	6	74	0.273853	0.46059	BCL2;CAPN3;FKRP;MYH7;SLC25A4;UTRN
DOID:9884	muscular dystrophy	http://www.ontobee.org/ontology/DOID?iri=http://purl.obolibrary.org/obo/DOID_9884	6	74	0.273853	0.46059	BCL2;CAPN3;FKRP;MYH7;SLC25A4;UTRN
DOID:4971	myelofibrosis	http://www.ontobee.org/ontology/DOID?iri=http://purl.obolibrary.org/obo/DOID_4971	4	45	0.276085	0.462886	HMGA2;IDH2;PDGFB;THBS1
DOID:9973	substance dependence	http://www.ontobee.org/ontology/DOID?iri=http://purl.obolibrary.org/obo/DOID_9973	4	45	0.276085	0.462886	CCND1;HSF1;SCN5A;SLC6A1
DOID:1116	pertussis	http://www.ontobee.org/ontology/DOID?iri=http://purl.obolibrary.org/obo/DOID_1116	3	31	0.277865	0.464413	IL10;NRAS;PTAFR
DOID:1483	gingival disease	http://www.ontobee.org/ontology/DOID?iri=http://purl.obolibrary.org/obo/DOID_1483	3	31	0.277865	0.464413	EDN1;IL10;IL18
DOID:10952	nephritis	http://www.ontobee.org/ontology/DOID?iri=http://purl.obolibrary.org/obo/DOID_10952	10	135	0.278312	0.464433	CASP3;CDKN1A;CXCR5;DUSP1;FASLG;FCGR3B;IL10;IL18;MIF;PTPRU
DOID:10155	intestinal cancer	http://www.ontobee.org/ontology/DOID?iri=http://purl.obolibrary.org/obo/DOID_10155	19	276	0.280342	0.46709	AIFM1;ATP2A2;BCL2;BCL2L1;CASP3;CCND1;CDKN1A;CXCR5;FAS;FASLG;HAS2;HSF1;IGF1R;IL10;KRAS;NRAS;SOX2;SOX9;TP53
DOID:4960	bone marrow cancer	http://www.ontobee.org/ontology/DOID?iri=http://purl.obolibrary.org/obo/DOID_4960	20	292	0.281147	0.467702	BCL2;BCL2L1;CCND1;COL1A1;FASLG;FCGR3B;HMGA2;IDH2;IGF1R;IL10;ITGB3;KRAS;NRAS;PDGFB;PMAIP1;PRDM1;SOCS1;THBS1;TNFSF9;TP53
DOID:1100	ovarian disease	http://www.ontobee.org/ontology/DOID?iri=http://purl.obolibrary.org/obo/DOID_1100	5	60	0.282128	0.467877	ACSL6;CYP19A1;IL18;PGRMC1;TGFBR3
DOID:303	substance-related disorder	http://www.ontobee.org/ontology/DOID?iri=http://purl.obolibrary.org/obo/DOID_303	5	60	0.282128	0.467877	CCND1;HSF1;KRAS;SCN5A;SLC6A1
DOID:2043	hepatitis B	http://www.ontobee.org/ontology/DOID?iri=http://purl.obolibrary.org/obo/DOID_2043	13	183	0.288858	0.475804	BCL2;CDKN1A;DNAJB1;FAS;FASLG;IL10;IL18;IRS2;KCTD9;KRAS;MIF;SOCS1;TP53
DOID:10113	trypanosomiasis	http://www.ontobee.org/ontology/DOID?iri=http://purl.obolibrary.org/obo/DOID_10113	2	18	0.289527	0.475804	IL10;MIF
DOID:14067	Plasmodium falciparum malaria	http://www.ontobee.org/ontology/DOID?iri=http://purl.obolibrary.org/obo/DOID_14067	2	18	0.289527	0.475804	IL10;IL18
DOID:1920	hyperuricemia	http://www.ontobee.org/ontology/DOID?iri=http://purl.obolibrary.org/obo/DOID_1920	2	18	0.289527	0.475804	ADRB3;EDN1
DOID:200	giant cell tumor	http://www.ontobee.org/ontology/DOID?iri=http://purl.obolibrary.org/obo/DOID_200	2	18	0.289527	0.475804	CCND1;TP53
DOID:8778	Crohn's disease	http://www.ontobee.org/ontology/DOID?iri=http://purl.obolibrary.org/obo/DOID_8778	4	46	0.289581	0.475804	IL10;IL13;IL18;PDX1
DOID:10283	prostate cancer	http://www.ontobee.org/ontology/DOID?iri=http://purl.obolibrary.org/obo/DOID_10283	26	390	0.291855	0.478804	ADIPOR2;AIFM1;ARG2;BCL2;BCL2L1;CCND1;CDKN1A;CEBPD;CHEK2;COL1A1;CYP19A1;FAS;IGF1R;IL10;IL18;ITGB3;KRAS;MAP3K1;MIF;PBX1;PDX1;RB1;S100A8;SCD;TP53;VAV3
DOID:9538	multiple myeloma	http://www.ontobee.org/ontology/DOID?iri=http://purl.obolibrary.org/obo/DOID_9538	16	231	0.294119	0.481173	BCL2;BCL2L1;CCND1;COL1A1;FASLG;FCGR3B;IGF1R;IL10;ITGB3;KRAS;NRAS;PMAIP1;PRDM1;SOCS1;TNFSF9;TP53
DOID:11981	morbid obesity	http://www.ontobee.org/ontology/DOID?iri=http://purl.obolibrary.org/obo/DOID_11981	3	32	0.294365	0.481173	ADRB1;IRS2;SCD
DOID:13241	Behcet's disease	http://www.ontobee.org/ontology/DOID?iri=http://purl.obolibrary.org/obo/DOID_13241	6	76	0.294651	0.481173	CCL21;CDH5;IL10;IL18;RORC;TNFRSF1B
DOID:219	colon cancer	http://www.ontobee.org/ontology/DOID?iri=http://purl.obolibrary.org/obo/DOID_219	18	263	0.295951	0.481535	AIFM1;ATP2A2;BCL2;BCL2L1;CASP3;CCND1;CDKN1A;CXCR5;FAS;FASLG;HAS2;HSF1;IGF1R;IL10;KRAS;NRAS;SOX9;TP53
DOID:5223	infertility	http://www.ontobee.org/ontology/DOID?iri=http://purl.obolibrary.org/obo/DOID_5223	12	169	0.300055	0.481535	AHR;CDC25A;CYP19A1;FAS;IGF1R;IL10;ITGB3;MIF;PRM2;TP53;VDAC2;YBX2
DOID:399	tuberculosis	http://www.ontobee.org/ontology/DOID?iri=http://purl.obolibrary.org/obo/DOID_399	10	138	0.301424	0.481535	BCL2;CD86;FASLG;ICOS;IL10;IL18;MIF;SOCS1;TNFRSF1B;TP53
DOID:7693	abdominal aortic aneurysm	http://www.ontobee.org/ontology/DOID?iri=http://purl.obolibrary.org/obo/DOID_7693	4	47	0.303166	0.481535	FBLN5;IL10;MIF;TGFBR1
DOID:0080011	bone resorption disease	http://www.ontobee.org/ontology/DOID?iri=http://purl.obolibrary.org/obo/DOID_0080011	7	92	0.303239	0.481535	COL1A1;CYP19A1;IGF1R;IRS2;THBS1;TNFRSF1B;USP6
DOID:715	T-cell leukemia	http://www.ontobee.org/ontology/DOID?iri=http://purl.obolibrary.org/obo/DOID_715	5	62	0.305604	0.481535	AHR;CCND1;CDKN1A;FAS;SOCS1
DOID:10154	small intestine cancer	http://www.ontobee.org/ontology/DOID?iri=http://purl.obolibrary.org/obo/DOID_10154	1	6	0.307046	0.481535	SOX2
DOID:1039	prolymphocytic leukemia	http://www.ontobee.org/ontology/DOID?iri=http://purl.obolibrary.org/obo/DOID_1039	1	6	0.307046	0.481535	CHEK2
DOID:12028	Conn's syndrome	http://www.ontobee.org/ontology/DOID?iri=http://purl.obolibrary.org/obo/DOID_12028	1	6	0.307046	0.481535	EDN1
DOID:12185	otosclerosis	http://www.ontobee.org/ontology/DOID?iri=http://purl.obolibrary.org/obo/DOID_12185	1	6	0.307046	0.481535	COL1A1
DOID:13088	periventricular leukomalacia	http://www.ontobee.org/ontology/DOID?iri=http://purl.obolibrary.org/obo/DOID_13088	1	6	0.307046	0.481535	IL18
DOID:13922	eosinophilic esophagitis	http://www.ontobee.org/ontology/DOID?iri=http://purl.obolibrary.org/obo/DOID_13922	1	6	0.307046	0.481535	IL13
DOID:1414	ovarian dysfunction	http://www.ontobee.org/ontology/DOID?iri=http://purl.obolibrary.org/obo/DOID_1414	1	6	0.307046	0.481535	CYP19A1
DOID:1614	male breast cancer	http://www.ontobee.org/ontology/DOID?iri=http://purl.obolibrary.org/obo/DOID_1614	1	6	0.307046	0.481535	CHEK2
DOID:1657	ventricular septal defect	http://www.ontobee.org/ontology/DOID?iri=http://purl.obolibrary.org/obo/DOID_1657	1	6	0.307046	0.481535	TBX5
DOID:1824	status epilepticus	http://www.ontobee.org/ontology/DOID?iri=http://purl.obolibrary.org/obo/DOID_1824	1	6	0.307046	0.481535	SOCS1
DOID:1856	cherubism	http://www.ontobee.org/ontology/DOID?iri=http://purl.obolibrary.org/obo/DOID_1856	1	6	0.307046	0.481535	USP6
DOID:1907	malignant fibroxanthoma	http://www.ontobee.org/ontology/DOID?iri=http://purl.obolibrary.org/obo/DOID_1907	1	6	0.307046	0.481535	RB1
DOID:2058	chronic mucocutaneous candidiasis	http://www.ontobee.org/ontology/DOID?iri=http://purl.obolibrary.org/obo/DOID_2058	1	6	0.307046	0.481535	IL10
DOID:3875	thrombophlebitis	http://www.ontobee.org/ontology/DOID?iri=http://purl.obolibrary.org/obo/DOID_3875	1	6	0.307046	0.481535	PCTP
DOID:397	restrictive cardiomyopathy	http://www.ontobee.org/ontology/DOID?iri=http://purl.obolibrary.org/obo/DOID_397	1	6	0.307046	0.481535	MYH7
DOID:4331	burning mouth syndrome	http://www.ontobee.org/ontology/DOID?iri=http://purl.obolibrary.org/obo/DOID_4331	1	6	0.307046	0.481535	NGF
DOID:4682	extrahepatic bile duct carcinoma	http://www.ontobee.org/ontology/DOID?iri=http://purl.obolibrary.org/obo/DOID_4682	1	6	0.307046	0.481535	CDKN1A
DOID:8574	lichen disease	http://www.ontobee.org/ontology/DOID?iri=http://purl.obolibrary.org/obo/DOID_8574	1	6	0.307046	0.481535	BCL2
DOID:864	phlebitis	http://www.ontobee.org/ontology/DOID?iri=http://purl.obolibrary.org/obo/DOID_864	1	6	0.307046	0.481535	PCTP
DOID:8691	mycosis fungoides	http://www.ontobee.org/ontology/DOID?iri=http://purl.obolibrary.org/obo/DOID_8691	1	6	0.307046	0.481535	FAS
DOID:9201	lichen planus	http://www.ontobee.org/ontology/DOID?iri=http://purl.obolibrary.org/obo/DOID_9201	1	6	0.307046	0.481535	BCL2
DOID:5082	liver cirrhosis	http://www.ontobee.org/ontology/DOID?iri=http://purl.obolibrary.org/obo/DOID_5082	14	202	0.310377	0.484942	ADIPOR2;ADRB3;BCL2;CASP3;CCND1;CDKN1A;CHUK;FAS;ICOS;IL18;MIF;STEAP3;TNFSF9;TP53
DOID:11724	limb-girdle muscular dystrophy	http://www.ontobee.org/ontology/DOID?iri=http://purl.obolibrary.org/obo/DOID_11724	2	19	0.311943	0.484942	CAPN3;FKRP
DOID:1532	pleural disease	http://www.ontobee.org/ontology/DOID?iri=http://purl.obolibrary.org/obo/DOID_1532	2	19	0.311943	0.484942	FASLG;TP53
DOID:2986	IgA glomerulonephritis	http://www.ontobee.org/ontology/DOID?iri=http://purl.obolibrary.org/obo/DOID_2986	2	19	0.311943	0.484942	IL10;MIF
DOID:3087	gingivitis	http://www.ontobee.org/ontology/DOID?iri=http://purl.obolibrary.org/obo/DOID_3087	2	19	0.311943	0.484942	IL10;IL18
DOID:4254	osteosclerosis	http://www.ontobee.org/ontology/DOID?iri=http://purl.obolibrary.org/obo/DOID_4254	2	19	0.311943	0.484942	ITGB3;VAV3
DOID:2742	auditory system disease	http://www.ontobee.org/ontology/DOID?iri=http://purl.obolibrary.org/obo/DOID_2742	6	78	0.31575	0.490147	CDKN1A;COL1A1;IL10;ITGB3;KCNQ4;MYO1F
DOID:1123	spondyloarthropathy	http://www.ontobee.org/ontology/DOID?iri=http://purl.obolibrary.org/obo/DOID_1123	5	63	0.317452	0.492073	FAS;ICOS;IL10;IL18;TNFRSF1B
DOID:16	integumentary system disease	http://www.ontobee.org/ontology/DOID?iri=http://purl.obolibrary.org/obo/DOID_16	23	348	0.322135	0.497968	ADRB2;ATP2A2;BCL2;CASP3;CCND1;CDKN1A;COL1A1;FAS;FASLG;FBLN5;GHR;IL10;IL13;IL18;IL25;ITGB3;MBTPS2;MIF;NGF;SOX9;TNFRSF1B;TP53;TSC1
DOID:0080014	chromosomal disease	http://www.ontobee.org/ontology/DOID?iri=http://purl.obolibrary.org/obo/DOID_0080014	9	125	0.322187	0.497968	ADAM12;CASP3;CHD7;IGF2BP3;MAP3K1;PAPPA;TBX1;THBS1;VAPA
DOID:5672	large intestine cancer	http://www.ontobee.org/ontology/DOID?iri=http://purl.obolibrary.org/obo/DOID_5672	18	268	0.32435	0.499864	AIFM1;ATP2A2;BCL2;BCL2L1;CASP3;CCND1;CDKN1A;CXCR5;FAS;FASLG;HAS2;HSF1;IGF1R;IL10;KRAS;NRAS;SOX9;TP53
DOID:9256	colorectal cancer	http://www.ontobee.org/ontology/DOID?iri=http://purl.obolibrary.org/obo/DOID_9256	18	268	0.32435	0.499864	AIFM1;ATP2A2;BCL2;BCL2L1;CASP3;CCND1;CDKN1A;CXCR5;FAS;FASLG;HAS2;HSF1;IGF1R;IL10;KRAS;NRAS;SOX9;TP53
DOID:934	viral infectious disease	http://www.ontobee.org/ontology/DOID?iri=http://purl.obolibrary.org/obo/DOID_934	42	658	0.32566	0.50116	ADIPOR2;BCL2;BCL2L1;CASP3;CCL21;CD86;CDH5;CDKN1A;CHEK2;CHFR;COIL;CPSF4;CRK;CXCR5;DNAJB1;ELF4;FAS;FASLG;IL10;IL13;IL18;IRS2;ITGB3;KCTD9;KPNA1;KRAS;MIF;NXF1;PIAS4;PMAIP1;RAG1;RAP1A;RB1;S100A8;SOCS1;THBS1;TMPRSS2;TNFSF9;TP53;TP73;UBE2I;YY1
DOID:4928	intrahepatic cholangiocarcinoma	http://www.ontobee.org/ontology/DOID?iri=http://purl.obolibrary.org/obo/DOID_4928	3	34	0.327509	0.501804	DUSP1;NGF;SFN
DOID:0060072	benign neoplasm	http://www.ontobee.org/ontology/DOID?iri=http://purl.obolibrary.org/obo/DOID_0060072	34	528	0.328785	0.501804	AHR;AIFM1;ARHGEF7;BCL2;BCL2L1;BMP5;CASP3;CCND1;CDKN1A;COL1A1;COL4A6;CYP19A1;DAPK1;EDN1;FAS;FASLG;GHR;HMGA1;HMGA2;IGF1R;IL10;KRAS;MIF;OPN3;PDGFB;RB1;SKIL;SNAP23;SOCS1;SOX2;SOX9;THBS1;THRA;TP53
DOID:684	hepatocellular carcinoma	http://www.ontobee.org/ontology/DOID?iri=http://purl.obolibrary.org/obo/DOID_684	49	774	0.329724	0.501804	ABCC5;AGER;BCL2;BCL2L1;CASP3;CCND1;CCR7;CDC25A;CDK6;CDKN1A;CHUK;CYP19A1;DAPK1;DKK3;DNAJB1;DUSP1;E2F5;EPHA3;FAS;FASLG;HMGA1;IGF1R;IGF2BP3;IL10;IL18;KLK10;KRAS;LTB;LYVE1;MIF;NGF;PDGFB;PEG10;PRKAA2;PTAFR;RASSF2;RB1;SLC30A1;SMO;SOCS1;STEAP3;TGFBR1;TGFBR3;THBS1;THRA;TP53;TP73;TXLNA;YWHAZ
DOID:686	liver carcinoma	http://www.ontobee.org/ontology/DOID?iri=http://purl.obolibrary.org/obo/DOID_686	49	774	0.329724	0.501804	ABCC5;AGER;BCL2;BCL2L1;CASP3;CCND1;CCR7;CDC25A;CDK6;CDKN1A;CHUK;CYP19A1;DAPK1;DKK3;DNAJB1;DUSP1;E2F5;EPHA3;FAS;FASLG;HMGA1;IGF1R;IGF2BP3;IL10;IL18;KLK10;KRAS;LTB;LYVE1;MIF;NGF;PDGFB;PEG10;PRKAA2;PTAFR;RASSF2;RB1;SLC30A1;SMO;SOCS1;STEAP3;TGFBR1;TGFBR3;THBS1;THRA;TP53;TP73;TXLNA;YWHAZ
DOID:3856	male reproductive organ cancer	http://www.ontobee.org/ontology/DOID?iri=http://purl.obolibrary.org/obo/DOID_3856	26	399	0.334193	0.501804	ADIPOR2;AIFM1;ARG2;BCL2;BCL2L1;CCND1;CDKN1A;CEBPD;CHEK2;COL1A1;CYP19A1;FAS;IGF1R;IL10;IL18;ITGB3;KRAS;MAP3K1;MIF;PBX1;PDX1;RB1;S100A8;SCD;TP53;VAV3
DOID:13133	HELLP syndrome	http://www.ontobee.org/ontology/DOID?iri=http://purl.obolibrary.org/obo/DOID_13133	2	20	0.334205	0.501804	ADAM12;FASLG
DOID:3907	lung squamous cell carcinoma	http://www.ontobee.org/ontology/DOID?iri=http://purl.obolibrary.org/obo/DOID_3907	2	20	0.334205	0.501804	CDKN1A;TP53
DOID:8283	peritonitis	http://www.ontobee.org/ontology/DOID?iri=http://purl.obolibrary.org/obo/DOID_8283	2	20	0.334205	0.501804	FAS;FASLG
DOID:850	lung disease	http://www.ontobee.org/ontology/DOID?iri=http://purl.obolibrary.org/obo/DOID_850	29	448	0.335267	0.501804	ADRB2;AGER;AHR;ATP2A2;BCL2;BCL2L1;CCL21;CCND1;CD86;COL1A1;EDN1;FAS;FASLG;FCGR3B;HMGA2;IL10;IL13;IL18;IL25;ITGB3;KCNMB1;MIF;NGF;RAP1A;SOCS1;TGFBR3;TP53;TSC1;YY1
DOID:77	gastrointestinal system disease	http://www.ontobee.org/ontology/DOID?iri=http://purl.obolibrary.org/obo/DOID_77	52	825	0.335385	0.501804	ADIPOR2;ADRB3;AGER;ATP2A2;BCL2;CASP3;CCL21;CCL7;CCND1;CDKN1A;CHUK;COL1A1;COL1A2;DMP1;DNAJB1;EDN1;FAS;FASLG;FCGR3B;GHR;HBEGF;ICOS;IGF2BP3;IKBKE;IL10;IL13;IL18;IRS2;ITGB3;KCNN3;KCTD9;KRAS;MIF;MSN;NGF;PDX1;PHOX2B;PRKCZ;RB1;S100A8;SCN5A;SEC63;SKIL;SOCS1;SOX2;STEAP3;THBS1;TNFRSF1B;TNFSF9;TP53;TP73;ZEB2
DOID:2531	hematologic cancer	http://www.ontobee.org/ontology/DOID?iri=http://purl.obolibrary.org/obo/DOID_2531	69	1107	0.338954	0.501804	ADRB2;AFF1;AHR;ARID3A;BCL2;BCL2L1;CASP3;CCL21;CCND1;CCR7;CD86;CDK6;CDKN1A;CEBPD;CHEK2;CHUK;COIL;COL1A1;CRMP1;CXCR5;CYP19A1;DAPK1;EIF4G2;ELF4;EPHA3;FAS;FASLG;FCGR3B;FZD4;HMGA1;HMGA2;IDH2;IGF1R;IL10;IL13;IL18;ITGB3;KRAS;MIF;MLLT10;MXD1;MYCN;NGF;NRAS;PBX1;PBX2;PDGFB;PEG10;PIAS4;PMAIP1;PRDM1;PRKAR2A;PTAFR;RAG1;RAP1GDS1;RB1;RUNX1T1;SMC1A;SOCS1;TET3;THBS1;TLX3;TNFSF9;TP53;TP73;UGCG;YWHAH;ZBTB16;ZNF451
DOID:1074	kidney failure	http://www.ontobee.org/ontology/DOID?iri=http://purl.obolibrary.org/obo/DOID_1074	10	143	0.340931	0.501804	ADIPOR2;CCND1;CDKN1A;EDN1;FCGR3B;IL10;IL18;IQCB1;S100A8;TNFRSF1B
DOID:12365	malaria	http://www.ontobee.org/ontology/DOID?iri=http://purl.obolibrary.org/obo/DOID_12365	7	96	0.34208	0.501804	ADRB2;EDN1;GYPC;IL10;IL18;MIF;TNFRSF1B
DOID:0050339	commensal bacterial infectious disease	http://www.ontobee.org/ontology/DOID?iri=http://purl.obolibrary.org/obo/DOID_0050339	3	35	0.34409	0.501804	IL10;NRAS;PTAFR
DOID:12704	ataxia telangiectasia	http://www.ontobee.org/ontology/DOID?iri=http://purl.obolibrary.org/obo/DOID_12704	3	35	0.34409	0.501804	CASP3;CDKN1A;TP53
DOID:3298	vaccinia	http://www.ontobee.org/ontology/DOID?iri=http://purl.obolibrary.org/obo/DOID_3298	3	35	0.34409	0.501804	BCL2;IL18;YY1
DOID:974	upper respiratory tract disease	http://www.ontobee.org/ontology/DOID?iri=http://purl.obolibrary.org/obo/DOID_974	8	112	0.345386	0.501804	BCL2;CASP3;CD86;EDN1;FASLG;IL13;IL18;NGF
DOID:381	arthropathy	http://www.ontobee.org/ontology/DOID?iri=http://purl.obolibrary.org/obo/DOID_381	6	81	0.347806	0.501804	FAS;ICOS;IL10;IL18;MIF;TNFRSF1B
DOID:0050292	primary systemic mycosis	http://www.ontobee.org/ontology/DOID?iri=http://purl.obolibrary.org/obo/DOID_0050292	1	7	0.348162	0.501804	IL10
DOID:10887	lepromatous leprosy	http://www.ontobee.org/ontology/DOID?iri=http://purl.obolibrary.org/obo/DOID_10887	1	7	0.348162	0.501804	IL10
DOID:11294	arteriovenous malformation	http://www.ontobee.org/ontology/DOID?iri=http://purl.obolibrary.org/obo/DOID_11294	1	7	0.348162	0.501804	PDGFB
DOID:11720	distal muscular dystrophy	http://www.ontobee.org/ontology/DOID?iri=http://purl.obolibrary.org/obo/DOID_11720	1	7	0.348162	0.501804	MYH7
DOID:12351	alcoholic hepatitis	http://www.ontobee.org/ontology/DOID?iri=http://purl.obolibrary.org/obo/DOID_12351	1	7	0.348162	0.501804	TNFRSF1B
DOID:12558	chronic progressive external ophthalmoplegia	http://www.ontobee.org/ontology/DOID?iri=http://purl.obolibrary.org/obo/DOID_12558	1	7	0.348162	0.501804	SLC25A4
DOID:12698	gynecomastia	http://www.ontobee.org/ontology/DOID?iri=http://purl.obolibrary.org/obo/DOID_12698	1	7	0.348162	0.501804	CYP19A1
DOID:12700	hyperprolactinemia	http://www.ontobee.org/ontology/DOID?iri=http://purl.obolibrary.org/obo/DOID_12700	1	7	0.348162	0.501804	INSR
DOID:13099	Moyamoya disease	http://www.ontobee.org/ontology/DOID?iri=http://purl.obolibrary.org/obo/DOID_13099	1	7	0.348162	0.501804	CASP3
DOID:1432	blindness	http://www.ontobee.org/ontology/DOID?iri=http://purl.obolibrary.org/obo/DOID_1432	1	7	0.348162	0.501804	IQCB1
DOID:14681	Silver-Russell syndrome	http://www.ontobee.org/ontology/DOID?iri=http://purl.obolibrary.org/obo/DOID_14681	1	7	0.348162	0.501804	IGF2BP3
DOID:1518	cecal disease	http://www.ontobee.org/ontology/DOID?iri=http://purl.obolibrary.org/obo/DOID_1518	1	7	0.348162	0.501804	EDN1
DOID:1996	rectum adenocarcinoma	http://www.ontobee.org/ontology/DOID?iri=http://purl.obolibrary.org/obo/DOID_1996	1	7	0.348162	0.501804	BCL2
DOID:2024	placental choriocarcinoma	http://www.ontobee.org/ontology/DOID?iri=http://purl.obolibrary.org/obo/DOID_2024	1	7	0.348162	0.501804	NR6A1
DOID:2025	gestational choriocarcinoma	http://www.ontobee.org/ontology/DOID?iri=http://purl.obolibrary.org/obo/DOID_2025	1	7	0.348162	0.501804	NR6A1
DOID:2034	encephalomalacia	http://www.ontobee.org/ontology/DOID?iri=http://purl.obolibrary.org/obo/DOID_2034	1	7	0.348162	0.501804	IL18
DOID:2321	dyspepsia	http://www.ontobee.org/ontology/DOID?iri=http://purl.obolibrary.org/obo/DOID_2321	1	7	0.348162	0.501804	MIF
DOID:2987	familial Mediterranean fever	http://www.ontobee.org/ontology/DOID?iri=http://purl.obolibrary.org/obo/DOID_2987	1	7	0.348162	0.501804	IL18
DOID:3030	mucinous adenocarcinoma	http://www.ontobee.org/ontology/DOID?iri=http://purl.obolibrary.org/obo/DOID_3030	1	7	0.348162	0.501804	KRAS
DOID:3614	Kallmann syndrome	http://www.ontobee.org/ontology/DOID?iri=http://purl.obolibrary.org/obo/DOID_3614	1	7	0.348162	0.501804	CHD7
DOID:4830	adenosquamous carcinoma	http://www.ontobee.org/ontology/DOID?iri=http://purl.obolibrary.org/obo/DOID_4830	1	7	0.348162	0.501804	KRAS
DOID:495	sclerosing hemangioma	http://www.ontobee.org/ontology/DOID?iri=http://purl.obolibrary.org/obo/DOID_495	1	7	0.348162	0.501804	TP53
DOID:5425	ovarian hyperstimulation syndrome	http://www.ontobee.org/ontology/DOID?iri=http://purl.obolibrary.org/obo/DOID_5425	1	7	0.348162	0.501804	IL18
DOID:5828	endometrioid ovary carcinoma	http://www.ontobee.org/ontology/DOID?iri=http://purl.obolibrary.org/obo/DOID_5828	1	7	0.348162	0.501804	TP53
DOID:8337	appendicitis	http://www.ontobee.org/ontology/DOID?iri=http://purl.obolibrary.org/obo/DOID_8337	1	7	0.348162	0.501804	EDN1
DOID:869	cholesteatoma	http://www.ontobee.org/ontology/DOID?iri=http://purl.obolibrary.org/obo/DOID_869	1	7	0.348162	0.501804	CDKN1A
DOID:8970	subacute sclerosing panencephalitis	http://www.ontobee.org/ontology/DOID?iri=http://purl.obolibrary.org/obo/DOID_8970	1	7	0.348162	0.501804	IL10
DOID:9406	hypopituitarism	http://www.ontobee.org/ontology/DOID?iri=http://purl.obolibrary.org/obo/DOID_9406	1	7	0.348162	0.501804	GHR
DOID:9651	systolic heart failure	http://www.ontobee.org/ontology/DOID?iri=http://purl.obolibrary.org/obo/DOID_9651	1	7	0.348162	0.501804	EDN1
DOID:104	bacterial infectious disease	http://www.ontobee.org/ontology/DOID?iri=http://purl.obolibrary.org/obo/DOID_104	16	240	0.349057	0.502417	BCL2;CCR7;CD86;FASLG;HBEGF;ICOS;IL10;IL18;MIF;NRAS;PRDM1;PSMB8;PTAFR;SOCS1;TNFRSF1B;TP53
DOID:2355	anemia	http://www.ontobee.org/ontology/DOID?iri=http://purl.obolibrary.org/obo/DOID_2355	14	208	0.350011	0.503112	CDKN1A;CEBPD;ERCC4;FASLG;IGF1R;IL10;IL18;ITGB3;MIF;MSN;PIGA;TNFRSF1B;TP53;TP73
DOID:1800	neuroendocrine carcinoma	http://www.ontobee.org/ontology/DOID?iri=http://purl.obolibrary.org/obo/DOID_1800	2	21	0.356253	0.510709	CDKN1A;IGF2BP3
DOID:3702	cervical adenocarcinoma	http://www.ontobee.org/ontology/DOID?iri=http://purl.obolibrary.org/obo/DOID_3702	2	21	0.356253	0.510709	KRAS;TP53
DOID:1826	epilepsy syndrome	http://www.ontobee.org/ontology/DOID?iri=http://purl.obolibrary.org/obo/DOID_1826	12	177	0.357433	0.511713	ABCC5;ATP6V0C;CACNB4;CASP3;DAPK1;INSR;KCNA1;KCNMB1;SCN5A;SOCS1;SYT1;WASL
DOID:2952	inner ear disease	http://www.ontobee.org/ontology/DOID?iri=http://purl.obolibrary.org/obo/DOID_2952	4	51	0.358007	0.511849	COL1A1;ITGB3;KCNQ4;MYO1F
DOID:3571	liver cancer	http://www.ontobee.org/ontology/DOID?iri=http://purl.obolibrary.org/obo/DOID_3571	49	783	0.36193	0.516767	ABCC5;AGER;BCL2;BCL2L1;CASP3;CCND1;CCR7;CDC25A;CDK6;CDKN1A;CHUK;CYP19A1;DAPK1;DKK3;DNAJB1;DUSP1;E2F5;EPHA3;FAS;FASLG;HMGA1;IGF1R;IGF2BP3;IL10;IL18;KLK10;KRAS;LTB;LYVE1;MIF;NGF;PDGFB;PEG10;PRKAA2;PTAFR;RASSF2;RB1;SLC30A1;SMO;SOCS1;STEAP3;TGFBR1;TGFBR3;THBS1;THRA;TP53;TP73;TXLNA;YWHAZ
DOID:0050161	lower respiratory tract disease	http://www.ontobee.org/ontology/DOID?iri=http://purl.obolibrary.org/obo/DOID_0050161	29	454	0.362867	0.517413	ADRB2;AGER;AHR;ATP2A2;BCL2;BCL2L1;CCL21;CCND1;CD86;COL1A1;EDN1;FAS;FASLG;FCGR3B;HMGA2;IL10;IL13;IL18;IL25;ITGB3;KCNMB1;MIF;NGF;RAP1A;SOCS1;TGFBR3;TP53;TSC1;YY1
DOID:2320	obstructive lung disease	http://www.ontobee.org/ontology/DOID?iri=http://purl.obolibrary.org/obo/DOID_2320	18	275	0.365229	0.520086	ADRB2;AGER;ATP2A2;BCL2;BCL2L1;CD86;COL1A1;EDN1;FAS;IL10;IL13;IL18;IL25;ITGB3;KCNMB1;NGF;RAP1A;TGFBR3
DOID:150	disease of mental health	http://www.ontobee.org/ontology/DOID?iri=http://purl.obolibrary.org/obo/DOID_150	74	1199	0.36649	0.521186	ACSL6;ADAM12;ADRB1;ADRB2;AGAP1;AGER;APBA1;BACE2;BCL2;CASP3;CCND1;CHEK2;CRY2;CYP19A1;CYP46A1;DAPK1;DGCR2;DKK3;DNAJB1;DYRK1A;EDN1;FAS;FASLG;FKRP;FZD3;GABRA6;GNAL;GTF2I;HDAC4;HMGA1;HOXA1;HOXB1;HSF1;IGF1R;IL10;IL18;ITGB3;KCNN3;KIF2A;KLK10;KRAS;MIF;NEFM;NPTN;NRGN;OLR1;PDGFB;POMT1;PPP3CA;SCN5A;SLC1A4;SLC30A1;SLC30A4;SLC30A6;SLC6A1;SLC6A5;SMC1A;ST3GAL1;TAGLN3;TARDBP;TBX1;THBS1;TNFRSF1B;TP53;TP73;TSC1;UB…
DOID:0050338	primary bacterial infectious disease	http://www.ontobee.org/ontology/DOID?iri=http://purl.obolibrary.org/obo/DOID_0050338	14	211	0.370194	0.525754	BCL2;CCR7;CD86;FASLG;HBEGF;ICOS;IL10;IL18;MIF;PRDM1;PSMB8;SOCS1;TNFRSF1B;TP53
DOID:10003	sensorineural hearing loss	http://www.ontobee.org/ontology/DOID?iri=http://purl.obolibrary.org/obo/DOID_10003	3	37	0.377118	0.531041	ITGB3;KCNQ4;MYO1F
DOID:0060049	autoimmune disease of urogenital tract	http://www.ontobee.org/ontology/DOID?iri=http://purl.obolibrary.org/obo/DOID_0060049	5	68	0.377282	0.531041	CDKN1A;CHUK;FAS;ICOS;TNFSF9
DOID:12236	primary biliary cirrhosis	http://www.ontobee.org/ontology/DOID?iri=http://purl.obolibrary.org/obo/DOID_12236	5	68	0.377282	0.531041	CDKN1A;CHUK;FAS;ICOS;TNFSF9
DOID:4531	mucoepidermoid carcinoma	http://www.ontobee.org/ontology/DOID?iri=http://purl.obolibrary.org/obo/DOID_4531	2	22	0.378034	0.531041	BZW1;TP53
DOID:9471	meningitis	http://www.ontobee.org/ontology/DOID?iri=http://purl.obolibrary.org/obo/DOID_9471	2	22	0.378034	0.531041	CASP3;MIF
DOID:986	alopecia areata	http://www.ontobee.org/ontology/DOID?iri=http://purl.obolibrary.org/obo/DOID_986	2	22	0.378034	0.531041	FAS;FASLG
DOID:37	skin disease	http://www.ontobee.org/ontology/DOID?iri=http://purl.obolibrary.org/obo/DOID_37	20	310	0.379287	0.531041	ADRB2;ATP2A2;BCL2;CASP3;CCND1;CDKN1A;COL1A1;FAS;FBLN5;GHR;IL10;IL13;IL18;IL25;ITGB3;MIF;NGF;TNFRSF1B;TP53;TSC1
DOID:0060083	immune system cancer	http://www.ontobee.org/ontology/DOID?iri=http://purl.obolibrary.org/obo/DOID_0060083	69	1120	0.379535	0.531041	ADRB2;AFF1;AHR;ARID3A;BCL2;BCL2L1;CASP3;CCL21;CCND1;CCR7;CD86;CDK6;CDKN1A;CEBPD;CHEK2;CHUK;COIL;COL1A1;CRMP1;CXCR5;CYP19A1;DAPK1;EIF4G2;ELF4;EPHA3;FAS;FASLG;FCGR3B;FZD4;HMGA1;HMGA2;IDH2;IGF1R;IL10;IL13;IL18;ITGB3;KRAS;MIF;MLLT10;MXD1;MYCN;NGF;NRAS;PBX1;PBX2;PDGFB;PEG10;PIAS4;PMAIP1;PRDM1;PRKAR2A;PTAFR;RAG1;RAP1GDS1;RB1;RUNX1T1;SMC1A;SOCS1;TET3;THBS1;TLX3;TNFSF9;TP53;TP73;UGCG;YWHAH;ZBTB16;ZNF451
DOID:0050589	inflammatory bowel disease	http://www.ontobee.org/ontology/DOID?iri=http://purl.obolibrary.org/obo/DOID_0050589	6	84	0.380134	0.531041	CCL21;IL10;IL13;IL18;MIF;PDX1
DOID:2645	benign mesothelioma	http://www.ontobee.org/ontology/DOID?iri=http://purl.obolibrary.org/obo/DOID_2645	4	53	0.385473	0.531041	CASP3;CDKN1A;KRAS;TP53
DOID:0050728	glycogen metabolism disorder	http://www.ontobee.org/ontology/DOID?iri=http://purl.obolibrary.org/obo/DOID_0050728	1	8	0.386845	0.531041	KCNJ3
DOID:10314	endocarditis	http://www.ontobee.org/ontology/DOID?iri=http://purl.obolibrary.org/obo/DOID_10314	1	8	0.386845	0.531041	ITGB3
DOID:10609	rickets	http://www.ontobee.org/ontology/DOID?iri=http://purl.obolibrary.org/obo/DOID_10609	1	8	0.386845	0.531041	DMP1
DOID:12155	lymphocytic choriomeningitis	http://www.ontobee.org/ontology/DOID?iri=http://purl.obolibrary.org/obo/DOID_12155	1	8	0.386845	0.531041	CD86
DOID:12466	secondary hyperparathyroidism	http://www.ontobee.org/ontology/DOID?iri=http://purl.obolibrary.org/obo/DOID_12466	1	8	0.386845	0.531041	CDKN1A
DOID:12918	thromboangiitis obliterans	http://www.ontobee.org/ontology/DOID?iri=http://purl.obolibrary.org/obo/DOID_12918	1	8	0.386845	0.531041	EDN1
DOID:14203	childhood type dermatomyositis	http://www.ontobee.org/ontology/DOID?iri=http://purl.obolibrary.org/obo/DOID_14203	1	8	0.386845	0.531041	CCL21
DOID:14219	renal tubular acidosis	http://www.ontobee.org/ontology/DOID?iri=http://purl.obolibrary.org/obo/DOID_14219	1	8	0.386845	0.531041	SLC4A4
DOID:1440	Machado-Joseph disease	http://www.ontobee.org/ontology/DOID?iri=http://purl.obolibrary.org/obo/DOID_1440	1	8	0.386845	0.531041	TARDBP
DOID:14447	gonadal dysgenesis	http://www.ontobee.org/ontology/DOID?iri=http://purl.obolibrary.org/obo/DOID_14447	1	8	0.386845	0.531041	MAP3K1
DOID:2345	plasma protein metabolism disease	http://www.ontobee.org/ontology/DOID?iri=http://purl.obolibrary.org/obo/DOID_2345	1	8	0.386845	0.531041	IL10
DOID:2747	glycogen storage disease	http://www.ontobee.org/ontology/DOID?iri=http://purl.obolibrary.org/obo/DOID_2747	1	8	0.386845	0.531041	KCNJ3
DOID:3587	pancreatic ductal carcinoma	http://www.ontobee.org/ontology/DOID?iri=http://purl.obolibrary.org/obo/DOID_3587	1	8	0.386845	0.531041	TP53
DOID:4236	carcinosarcoma	http://www.ontobee.org/ontology/DOID?iri=http://purl.obolibrary.org/obo/DOID_4236	1	8	0.386845	0.531041	TP53
DOID:582	hemoglobinuria	http://www.ontobee.org/ontology/DOID?iri=http://purl.obolibrary.org/obo/DOID_582	1	8	0.386845	0.531041	PIGA
DOID:9008	psoriatic arthritis	http://www.ontobee.org/ontology/DOID?iri=http://purl.obolibrary.org/obo/DOID_9008	1	8	0.386845	0.531041	S100A8
DOID:0060041	autism spectrum disorder	http://www.ontobee.org/ontology/DOID?iri=http://purl.obolibrary.org/obo/DOID_0060041	11	165	0.388169	0.531492	ADRB2;AGAP1;BCL2;CASP3;HOXA1;HOXB1;ITGB3;MIF;TP53;TSC1;UBE2H
DOID:12849	autistic disorder	http://www.ontobee.org/ontology/DOID?iri=http://purl.obolibrary.org/obo/DOID_12849	11	165	0.388169	0.531492	ADRB2;AGAP1;BCL2;CASP3;HOXA1;HOXB1;ITGB3;MIF;TP53;TSC1;UBE2H
DOID:1682	congenital heart disease	http://www.ontobee.org/ontology/DOID?iri=http://purl.obolibrary.org/obo/DOID_1682	4	54	0.399158	0.545612	ATP2A2;EDN1;TBX1;TBX5
DOID:10588	adrenoleukodystrophy	http://www.ontobee.org/ontology/DOID?iri=http://purl.obolibrary.org/obo/DOID_10588	2	23	0.399502	0.545612	IL10;TNFRSF1B
DOID:7	disease of anatomical entity	http://www.ontobee.org/ontology/DOID?iri=http://purl.obolibrary.org/obo/DOID_7	205	3413	0.407337	0.555602	ABCC5;ACSL6;ADAM12;ADAM15;ADAMTS5;ADIPOR2;ADRB1;ADRB2;ADRB3;AGER;AHR;AIFM1;APBA1;ARG2;ATG16L1;ATP2A2;ATP6V0C;ATXN1;BACE2;BCL2;BCL2L1;BMP5;CACNB4;CAPN3;CASP3;CCL21;CCL7;CCND1;CCR7;CD86;CDC25A;CDH5;CDK6;CDKN1A;CEBPD;CHD7;CHEK2;CHUK;CLDN11;CLEC16A;COL15A1;COL1A1;COL1A2;COL9A1;COL9A3;CXCR5;CYP19A1;CYP46A1;DAPK1;DKK3;DMP1;DNAJB1;DUSP1;DYRK1A;EDN1;ELOVL4;ENGASE;ERCC4;ESRRG;FAS;FASLG;FBLN5;FBN2;FCGR3B;F…
DOID:10747	lymphoid leukemia	http://www.ontobee.org/ontology/DOID?iri=http://purl.obolibrary.org/obo/DOID_10747	5	71	0.41323	0.562211	AHR;CCND1;CDKN1A;FAS;SOCS1
DOID:3083	chronic obstructive pulmonary disease	http://www.ontobee.org/ontology/DOID?iri=http://purl.obolibrary.org/obo/DOID_3083	13	201	0.41365	0.562211	ADRB2;AGER;ATP2A2;BCL2;CD86;COL1A1;EDN1;FAS;IL10;IL13;IL18;RAP1A;TGFBR3
DOID:3211	lysosomal storage disease	http://www.ontobee.org/ontology/DOID?iri=http://purl.obolibrary.org/obo/DOID_3211	9	136	0.416285	0.562211	ADIPOR2;ADRB2;AGER;CTNS;FAS;GNPTAB;IL10;MIF;SCD
DOID:4766	embryoma	http://www.ontobee.org/ontology/DOID?iri=http://purl.obolibrary.org/obo/DOID_4766	20	317	0.419036	0.562211	AEN;BCL2;BCL2L1;CCND1;CDKN1A;FAS;FASLG;HSF1;IGF1R;IL10;IL18;ITGB3;KRAS;MEF2D;MTUS1;PHOX2B;RB1;RRM2;S100A2;VAV3
DOID:10688	hypertrophy of breast	http://www.ontobee.org/ontology/DOID?iri=http://purl.obolibrary.org/obo/DOID_10688	1	9	0.423238	0.562211	CYP19A1
DOID:12120	pulmonary alveolar proteinosis	http://www.ontobee.org/ontology/DOID?iri=http://purl.obolibrary.org/obo/DOID_12120	1	9	0.423238	0.562211	IL10
DOID:13042	persistent fetal circulation syndrome	http://www.ontobee.org/ontology/DOID?iri=http://purl.obolibrary.org/obo/DOID_13042	1	9	0.423238	0.562211	LYVE1
DOID:14175	von Hippel-Lindau disease	http://www.ontobee.org/ontology/DOID?iri=http://purl.obolibrary.org/obo/DOID_14175	1	9	0.423238	0.562211	CCND1
DOID:1729	retinal vascular occlusion	http://www.ontobee.org/ontology/DOID?iri=http://purl.obolibrary.org/obo/DOID_1729	1	9	0.423238	0.562211	IL10
DOID:2224	hemorrhagic thrombocythemia	http://www.ontobee.org/ontology/DOID?iri=http://purl.obolibrary.org/obo/DOID_2224	1	9	0.423238	0.562211	BCL2L1
DOID:2438	dermis tumor	http://www.ontobee.org/ontology/DOID?iri=http://purl.obolibrary.org/obo/DOID_2438	1	9	0.423238	0.562211	SOX2
DOID:3021	acute kidney failure	http://www.ontobee.org/ontology/DOID?iri=http://purl.obolibrary.org/obo/DOID_3021	1	9	0.423238	0.562211	IL10
DOID:3493	signet ring cell adenocarcinoma	http://www.ontobee.org/ontology/DOID?iri=http://purl.obolibrary.org/obo/DOID_3493	1	9	0.423238	0.562211	SOX2
DOID:4418	cutaneous fibrous histiocytoma	http://www.ontobee.org/ontology/DOID?iri=http://purl.obolibrary.org/obo/DOID_4418	1	9	0.423238	0.562211	SOX2
DOID:4988	alcoholic pancreatitis	http://www.ontobee.org/ontology/DOID?iri=http://purl.obolibrary.org/obo/DOID_4988	1	9	0.423238	0.562211	IL10
DOID:5327	retinal detachment	http://www.ontobee.org/ontology/DOID?iri=http://purl.obolibrary.org/obo/DOID_5327	1	9	0.423238	0.562211	EDN1
DOID:539	ophthalmoplegia	http://www.ontobee.org/ontology/DOID?iri=http://purl.obolibrary.org/obo/DOID_539	1	9	0.423238	0.562211	SLC25A4
DOID:718	autoimmune hemolytic anemia	http://www.ontobee.org/ontology/DOID?iri=http://purl.obolibrary.org/obo/DOID_718	1	9	0.423238	0.562211	IL10
DOID:8584	Burkitt lymphoma	http://www.ontobee.org/ontology/DOID?iri=http://purl.obolibrary.org/obo/DOID_8584	1	9	0.423238	0.562211	IL10
DOID:9965	toxoplasmosis	http://www.ontobee.org/ontology/DOID?iri=http://purl.obolibrary.org/obo/DOID_9965	1	9	0.423238	0.562211	IL10
DOID:999	eosinophilia	http://www.ontobee.org/ontology/DOID?iri=http://purl.obolibrary.org/obo/DOID_999	1	9	0.423238	0.562211	IL25
DOID:10591	pre-eclampsia	http://www.ontobee.org/ontology/DOID?iri=http://purl.obolibrary.org/obo/DOID_10591	16	252	0.425032	0.563228	ADAM12;ADRB2;ADRB3;AGER;ARG2;EDN1;FAS;FASLG;HBEGF;ICOS;IL10;IL18;MIF;OLR1;PAPPA;PTPRU
DOID:557	kidney disease	http://www.ontobee.org/ontology/DOID?iri=http://purl.obolibrary.org/obo/DOID_557	27	434	0.425058	0.563228	ADIPOR2;ADRB2;AGER;CASP3;CCND1;CDKN1A;CXCR5;DKK3;DUSP1;EDN1;FAS;FASLG;FCGR3B;HBEGF;IL10;IL18;IQCB1;MIF;NGF;PIGA;PSMB8;PTPRU;S100A8;SLC4A4;THBS1;TNFRSF1B;TP53
DOID:10584	retinitis pigmentosa	http://www.ontobee.org/ontology/DOID?iri=http://purl.obolibrary.org/obo/DOID_10584	4	56	0.426359	0.564252	EDN1;ELOVL4;IMPG2;SMC1A
DOID:1909	melanoma	http://www.ontobee.org/ontology/DOID?iri=http://purl.obolibrary.org/obo/DOID_1909	40	652	0.432863	0.57215	ADAM15;AGER;ATF2;BCL2;BCL2L1;CAPN3;CASP3;CCL21;CCND1;CCR7;CD86;CDH5;CDKN1A;DKK3;EDN1;FAS;FASLG;ICOS;IGF2BP3;IL10;IL18;ITGB3;KCNN3;KRAS;MSN;MXD1;NGF;NRAS;PLXNC1;PMAIP1;PTAFR;RB1;SFN;SKIL;SOCS1;SOX2;SOX9;STX17;TP53;TP73
DOID:3324	mood disorder	http://www.ontobee.org/ontology/DOID?iri=http://purl.obolibrary.org/obo/DOID_3324	11	171	0.434641	0.57379	BCL2;CRY2;DNAJB1;EDN1;GNAL;IGF1R;SLC6A5;ST3GAL1;TNFRSF1B;VAPA;YWHAH
DOID:11963	esophagitis	http://www.ontobee.org/ontology/DOID?iri=http://purl.obolibrary.org/obo/DOID_11963	2	25	0.441348	0.581208	IL13;NGF
DOID:205	hyperostosis	http://www.ontobee.org/ontology/DOID?iri=http://purl.obolibrary.org/obo/DOID_205	2	25	0.441348	0.581208	CCND1;COL1A1
DOID:3312	bipolar disorder	http://www.ontobee.org/ontology/DOID?iri=http://purl.obolibrary.org/obo/DOID_3312	9	139	0.442127	0.581516	BCL2;CRY2;DNAJB1;GNAL;SLC6A5;ST3GAL1;TNFRSF1B;VAPA;YWHAH
DOID:1443	cerebral degeneration	http://www.ontobee.org/ontology/DOID?iri=http://purl.obolibrary.org/obo/DOID_1443	6	90	0.444709	0.582891	CASP3;FAS;FASLG;IL10;TARDBP;TNFRSF1B
DOID:4481	allergic rhinitis	http://www.ontobee.org/ontology/DOID?iri=http://purl.obolibrary.org/obo/DOID_4481	6	90	0.444709	0.582891	BCL2;CD86;EDN1;IL13;IL18;NGF
DOID:18	urinary system disease	http://www.ontobee.org/ontology/DOID?iri=http://purl.obolibrary.org/obo/DOID_18	27	438	0.444809	0.582891	ADIPOR2;ADRB2;AGER;CASP3;CCND1;CDKN1A;CXCR5;DKK3;DUSP1;EDN1;FAS;FASLG;FCGR3B;HBEGF;IL10;IL18;IQCB1;MIF;NGF;PIGA;PSMB8;PTPRU;S100A8;SLC4A4;THBS1;TNFRSF1B;TP53
DOID:1520	colon carcinoma	http://www.ontobee.org/ontology/DOID?iri=http://purl.obolibrary.org/obo/DOID_1520	10	156	0.446415	0.584279	CCND1;CDKN1A;CXCR5;FAS;FASLG;HAS2;KRAS;NRAS;SOX9;TP53
DOID:0050737	autosomal recessive disease	http://www.ontobee.org/ontology/DOID?iri=http://purl.obolibrary.org/obo/DOID_0050737	18	289	0.449113	0.586536	ADRB1;ADRB2;ADRB3;ARG2;CASP3;CCDC28B;CDKN1A;COL1A1;EDN1;GHR;IGF1R;IL10;IL18;PRKAA2;RAP1A;SCD;SLC20A1;TP53
DOID:341	peripheral vascular disease	http://www.ontobee.org/ontology/DOID?iri=http://purl.obolibrary.org/obo/DOID_341	4	58	0.453239	0.586536	CDKN1A;EDN1;IL10;TP53
DOID:3627	aortic aneurysm	http://www.ontobee.org/ontology/DOID?iri=http://purl.obolibrary.org/obo/DOID_3627	4	58	0.453239	0.586536	FBLN5;IL10;MIF;TGFBR1
DOID:11476	osteoporosis	http://www.ontobee.org/ontology/DOID?iri=http://purl.obolibrary.org/obo/DOID_11476	6	91	0.45537	0.586536	COL1A1;CYP19A1;IGF1R;IRS2;THBS1;TNFRSF1B
DOID:2163	nasal cavity disease	http://www.ontobee.org/ontology/DOID?iri=http://purl.obolibrary.org/obo/DOID_2163	6	91	0.45537	0.586536	BCL2;CD86;EDN1;IL13;IL18;NGF
DOID:2825	nose disease	http://www.ontobee.org/ontology/DOID?iri=http://purl.obolibrary.org/obo/DOID_2825	6	91	0.45537	0.586536	BCL2;CD86;EDN1;IL13;IL18;NGF
DOID:4483	rhinitis	http://www.ontobee.org/ontology/DOID?iri=http://purl.obolibrary.org/obo/DOID_4483	6	91	0.45537	0.586536	BCL2;CD86;EDN1;IL13;IL18;NGF
DOID:0060050	autoimmune disease of blood	http://www.ontobee.org/ontology/DOID?iri=http://purl.obolibrary.org/obo/DOID_0060050	1	10	0.457476	0.586536	IL10
DOID:11504	autonomic neuropathy	http://www.ontobee.org/ontology/DOID?iri=http://purl.obolibrary.org/obo/DOID_11504	1	10	0.457476	0.586536	NGF
DOID:1586	rheumatic fever	http://www.ontobee.org/ontology/DOID?iri=http://purl.obolibrary.org/obo/DOID_1586	1	10	0.457476	0.586536	FCGR3B
DOID:2113	coccidiosis	http://www.ontobee.org/ontology/DOID?iri=http://purl.obolibrary.org/obo/DOID_2113	1	10	0.457476	0.586536	IL10
DOID:2843	long QT syndrome	http://www.ontobee.org/ontology/DOID?iri=http://purl.obolibrary.org/obo/DOID_2843	1	10	0.457476	0.586536	SCN5A
DOID:3179	inverted papilloma	http://www.ontobee.org/ontology/DOID?iri=http://purl.obolibrary.org/obo/DOID_3179	1	10	0.457476	0.586536	BCL2
DOID:3314	angiomyolipoma	http://www.ontobee.org/ontology/DOID?iri=http://purl.obolibrary.org/obo/DOID_3314	1	10	0.457476	0.586536	TP53
DOID:656	adrenal adenoma	http://www.ontobee.org/ontology/DOID?iri=http://purl.obolibrary.org/obo/DOID_656	1	10	0.457476	0.586536	EDN1
DOID:678	progressive supranuclear palsy	http://www.ontobee.org/ontology/DOID?iri=http://purl.obolibrary.org/obo/DOID_678	1	10	0.457476	0.586536	TARDBP
DOID:699	mitochondrial myopathy	http://www.ontobee.org/ontology/DOID?iri=http://purl.obolibrary.org/obo/DOID_699	1	10	0.457476	0.586536	SLC25A4
DOID:0050851	glomerulosclerosis	http://www.ontobee.org/ontology/DOID?iri=http://purl.obolibrary.org/obo/DOID_0050851	2	26	0.461663	0.588373	IL10;PTPRU
DOID:1312	focal segmental glomerulosclerosis	http://www.ontobee.org/ontology/DOID?iri=http://purl.obolibrary.org/obo/DOID_1312	2	26	0.461663	0.588373	IL10;PTPRU
DOID:13129	severe pre-eclampsia	http://www.ontobee.org/ontology/DOID?iri=http://purl.obolibrary.org/obo/DOID_13129	2	26	0.461663	0.588373	ADAM12;FASLG
DOID:780	placenta disease	http://www.ontobee.org/ontology/DOID?iri=http://purl.obolibrary.org/obo/DOID_780	2	26	0.461663	0.588373	EDN1;IL10
DOID:8029	sporadic breast cancer	http://www.ontobee.org/ontology/DOID?iri=http://purl.obolibrary.org/obo/DOID_8029	2	26	0.461663	0.588373	CYP19A1;TP53
DOID:0060040	pervasive developmental disorder	http://www.ontobee.org/ontology/DOID?iri=http://purl.obolibrary.org/obo/DOID_0060040	11	175	0.465555	0.592451	ADRB2;AGAP1;BCL2;CASP3;HOXA1;HOXB1;ITGB3;MIF;TP53;TSC1;UBE2H
DOID:421	hair disease	http://www.ontobee.org/ontology/DOID?iri=http://purl.obolibrary.org/obo/DOID_421	4	59	0.466528	0.592451	FAS;FASLG;MBTPS2;SOX9
DOID:520	aortic disease	http://www.ontobee.org/ontology/DOID?iri=http://purl.obolibrary.org/obo/DOID_520	4	59	0.466528	0.592451	FBLN5;IL10;MIF;TGFBR1
DOID:0060036	intrinsic cardiomyopathy	http://www.ontobee.org/ontology/DOID?iri=http://purl.obolibrary.org/obo/DOID_0060036	8	126	0.473528	0.600627	ADRB1;ADRB2;FAS;FKRP;IGF1R;MYH7;SCN5A;TP53
DOID:3393	coronary artery disease	http://www.ontobee.org/ontology/DOID?iri=http://purl.obolibrary.org/obo/DOID_3393	19	310	0.474721	0.601426	ADRB1;ADRB2;AGER;CLEC16A;EDN1;IL10;IL18;ITGB3;MIF;OLR1;PAPPA;PSMB8;SH2B3;SOX2;THBS1;TNFRSF1B;TP53;TRIB1;ZNF202
DOID:1205	hypersensitivity reaction type I disease	http://www.ontobee.org/ontology/DOID?iri=http://purl.obolibrary.org/obo/DOID_1205	7	110	0.479857	0.607213	AGER;AHR;IL10;IL13;IL18;ITGB3;TP53
DOID:1485	cystic fibrosis	http://www.ontobee.org/ontology/DOID?iri=http://purl.obolibrary.org/obo/DOID_1485	8	127	0.482567	0.609919	ADRB1;ADRB2;ADRB3;COL1A1;EDN1;IL10;IL18;PRKAA2
DOID:3119	gastrointestinal system cancer	http://www.ontobee.org/ontology/DOID?iri=http://purl.obolibrary.org/obo/DOID_3119	67	1120	0.48864	0.613113	ABCC5;ADIPOR2;AGER;AIFM1;ATP2A2;BCL2;BCL2L1;CASP3;CCND1;CCR7;CDC25A;CDK6;CDKN1A;CHUK;COL1A2;CXCR5;CYP19A1;DAPK1;DKK3;DNAJB1;DUSP1;E2F5;EPHA3;FAS;FASLG;HAS2;HMGA1;HSF1;IGF1R;IGF2BP3;IL10;IL18;ITGB3;KLK10;KRAS;LTB;LYVE1;MIF;MMP11;NGF;NRAS;PBX1;PBX2;PDGFB;PDX1;PEG10;PRKAA2;PTAFR;RASSF2;RB1;S100A2;S100A8;SFN;SLC30A1;SMO;SOCS1;SOX2;SOX9;STEAP3;TGFBR1;TGFBR3;THBS1;THRA;TP53;TP73;TXLNA;YWHAZ
DOID:0050815	eye adnexa disease	http://www.ontobee.org/ontology/DOID?iri=http://purl.obolibrary.org/obo/DOID_0050815	1	11	0.489687	0.613113	BCL2
DOID:10273	heart conduction disease	http://www.ontobee.org/ontology/DOID?iri=http://purl.obolibrary.org/obo/DOID_10273	1	11	0.489687	0.613113	SCN5A
DOID:154	mixed cell type cancer	http://www.ontobee.org/ontology/DOID?iri=http://purl.obolibrary.org/obo/DOID_154	1	11	0.489687	0.613113	TP53
DOID:1574	alcohol abuse	http://www.ontobee.org/ontology/DOID?iri=http://purl.obolibrary.org/obo/DOID_1574	1	11	0.489687	0.613113	KRAS
DOID:2089	constipation	http://www.ontobee.org/ontology/DOID?iri=http://purl.obolibrary.org/obo/DOID_2089	1	11	0.489687	0.613113	S100A8
DOID:3650	lactic acidosis	http://www.ontobee.org/ontology/DOID?iri=http://purl.obolibrary.org/obo/DOID_3650	1	11	0.489687	0.613113	IL10
DOID:9779	bowel dysfunction	http://www.ontobee.org/ontology/DOID?iri=http://purl.obolibrary.org/obo/DOID_9779	1	11	0.489687	0.613113	S100A8
DOID:4195	hyperglycemia	http://www.ontobee.org/ontology/DOID?iri=http://purl.obolibrary.org/obo/DOID_4195	8	128	0.491567	0.614747	AGER;EDN1;IL18;INSR;KCNMB1;PRKCZ;SMO;TNFRSF1B
DOID:4450	renal cell carcinoma	http://www.ontobee.org/ontology/DOID?iri=http://purl.obolibrary.org/obo/DOID_4450	19	313	0.492223	0.614847	BCL2;BCL2L1;CCND1;CDKN1A;DAPK1;DUSP1;EDN1;FASLG;FCGR3B;IGF1R;IGF2BP3;IL18;KRAS;PRKCZ;ROR2;SLC4A4;TGFBR3;THBS1;TP53
DOID:574	peripheral nervous system disease	http://www.ontobee.org/ontology/DOID?iri=http://purl.obolibrary.org/obo/DOID_574	5	78	0.495434	0.618135	FAS;IL10;ITGB3;NGF;SLC25A4
DOID:0060037	developmental disorder of mental health	http://www.ontobee.org/ontology/DOID?iri=http://purl.obolibrary.org/obo/DOID_0060037	19	314	0.498037	0.620658	ADRB2;AGAP1;BCL2;CASP3;FKRP;GTF2I;HDAC4;HOXA1;HOXB1;ITGB3;MIF;NRGN;POMT1;SMC1A;TP53;TSC1;UBE2H;ZEB2;ZFYVE26
DOID:1561	cognitive disorder	http://www.ontobee.org/ontology/DOID?iri=http://purl.obolibrary.org/obo/DOID_1561	57	955	0.500447	0.6214	ACSL6;ADAM12;ADRB1;ADRB2;AGER;APBA1;BACE2;BCL2;CASP3;CHEK2;CRY2;CYP19A1;CYP46A1;DAPK1;DGCR2;DKK3;DNAJB1;DYRK1A;EDN1;FAS;FASLG;FZD3;GABRA6;GNAL;HDAC4;HMGA1;IGF1R;IL10;IL18;KCNN3;KIF2A;KLK10;MIF;NEFM;NPTN;NRGN;OLR1;PDGFB;PPP3CA;SLC1A4;SLC30A1;SLC30A4;SLC30A6;SLC6A5;ST3GAL1;TAGLN3;TARDBP;TBX1;THBS1;TNFRSF1B;TP53;TP73;VAPA;VSNL1;XK;YWHAH;YWHAZ
DOID:10907	microcephaly	http://www.ontobee.org/ontology/DOID?iri=http://purl.obolibrary.org/obo/DOID_10907	2	28	0.50096	0.6214	DYRK1A;POMT1
DOID:234	colon adenocarcinoma	http://www.ontobee.org/ontology/DOID?iri=http://purl.obolibrary.org/obo/DOID_234	2	28	0.50096	0.6214	CCND1;KRAS
DOID:9744	type 1 diabetes mellitus	http://www.ontobee.org/ontology/DOID?iri=http://purl.obolibrary.org/obo/DOID_9744	2	28	0.50096	0.6214	FASLG;IL13
DOID:3612	retinitis	http://www.ontobee.org/ontology/DOID?iri=http://purl.obolibrary.org/obo/DOID_3612	4	62	0.505649	0.626489	EDN1;ELOVL4;IMPG2;SMC1A
DOID:10825	essential hypertension	http://www.ontobee.org/ontology/DOID?iri=http://purl.obolibrary.org/obo/DOID_10825	7	113	0.508679	0.629513	ADRB1;ADRB2;ADRB3;CYP19A1;IGF1R;IL10;INSR
DOID:1579	respiratory system disease	http://www.ontobee.org/ontology/DOID?iri=http://purl.obolibrary.org/obo/DOID_1579	30	504	0.519798	0.633238	ADRB2;AGER;AHR;ATP2A2;BCL2;BCL2L1;CASP3;CCL21;CCND1;CD86;COL1A1;EDN1;FAS;FASLG;FCGR3B;HMGA2;IL10;IL13;IL18;IL25;ITGB3;KCNMB1;MIF;NGF;RAP1A;SOCS1;TGFBR3;TP53;TSC1;YY1
DOID:13250	diarrhea	http://www.ontobee.org/ontology/DOID?iri=http://purl.obolibrary.org/obo/DOID_13250	2	29	0.519906	0.633238	IL10;S100A8
DOID:319	spinal cord disease	http://www.ontobee.org/ontology/DOID?iri=http://purl.obolibrary.org/obo/DOID_319	2	29	0.519906	0.633238	COL1A1;IL10
DOID:5100	middle ear disease	http://www.ontobee.org/ontology/DOID?iri=http://purl.obolibrary.org/obo/DOID_5100	2	29	0.519906	0.633238	CDKN1A;IL10
DOID:13774	Addison's disease	http://www.ontobee.org/ontology/DOID?iri=http://purl.obolibrary.org/obo/DOID_13774	1	12	0.51999	0.633238	CLEC16A
DOID:224	transient cerebral ischemia	http://www.ontobee.org/ontology/DOID?iri=http://purl.obolibrary.org/obo/DOID_224	1	12	0.51999	0.633238	FAS
DOID:3382	liposarcoma	http://www.ontobee.org/ontology/DOID?iri=http://purl.obolibrary.org/obo/DOID_3382	1	12	0.51999	0.633238	IGF2BP2
DOID:3911	progeria	http://www.ontobee.org/ontology/DOID?iri=http://purl.obolibrary.org/obo/DOID_3911	1	12	0.51999	0.633238	TP53
DOID:3939	lipomatous cancer	http://www.ontobee.org/ontology/DOID?iri=http://purl.obolibrary.org/obo/DOID_3939	1	12	0.51999	0.633238	IGF2BP2
DOID:5166	endometrial stromal tumor	http://www.ontobee.org/ontology/DOID?iri=http://purl.obolibrary.org/obo/DOID_5166	1	12	0.51999	0.633238	CCND1
DOID:5688	Werner syndrome	http://www.ontobee.org/ontology/DOID?iri=http://purl.obolibrary.org/obo/DOID_5688	1	12	0.51999	0.633238	SLC20A1
DOID:6419	tetralogy of Fallot	http://www.ontobee.org/ontology/DOID?iri=http://purl.obolibrary.org/obo/DOID_6419	1	12	0.51999	0.633238	TBX1
DOID:7319	axonal neuropathy	http://www.ontobee.org/ontology/DOID?iri=http://purl.obolibrary.org/obo/DOID_7319	1	12	0.51999	0.633238	GAN
DOID:8541	Sezary's disease	http://www.ontobee.org/ontology/DOID?iri=http://purl.obolibrary.org/obo/DOID_8541	1	12	0.51999	0.633238	CCL21
DOID:863	nervous system disease	http://www.ontobee.org/ontology/DOID?iri=http://purl.obolibrary.org/obo/DOID_863	94	1587	0.524591	0.638113	ABCC5;ADRB1;ADRB2;AGER;AIFM1;APBA1;ATP6V0C;ATXN1;BACE2;BCL2;BCL2L1;CACNB4;CAPN3;CASP3;CCL7;CCND1;CCR7;CDK6;CDKN1A;CHD7;CHEK2;CLDN11;COL1A1;CYP19A1;CYP46A1;DAPK1;DKK3;DYRK1A;EDN1;ELOVL4;FAS;FASLG;FBLN5;FCGR3B;FKRP;FZD4;GAN;GLRX;GTF2I;HMGA2;HOXA1;HOXD10;IGF1R;IL10;IL13;IL18;IMPG2;INSR;IQCB1;ITGB3;KCNA1;KCNMB1;KCNN3;KCNQ4;KPNA1;MDM4;MEF2D;MIF;MMP11;MYCN;MYH7;MYO1F;NEFM;NGF;OLR1;PDGFB;PHOX2B;PLXND1;P…
DOID:784	chronic kidney failure	http://www.ontobee.org/ontology/DOID?iri=http://purl.obolibrary.org/obo/DOID_784	4	64	0.531012	0.645188	EDN1;FCGR3B;IL10;IL18
DOID:1555	urticaria	http://www.ontobee.org/ontology/DOID?iri=http://purl.obolibrary.org/obo/DOID_1555	3	47	0.533644	0.646914	ADRB2;IL13;NGF
DOID:627	severe combined immunodeficiency	http://www.ontobee.org/ontology/DOID?iri=http://purl.obolibrary.org/obo/DOID_627	3	47	0.533644	0.646914	CHD7;HIF3A;RAG1
DOID:594	panic disorder	http://www.ontobee.org/ontology/DOID?iri=http://purl.obolibrary.org/obo/DOID_594	2	30	0.538366	0.651231	GABRA6;IL10
DOID:12603	acute leukemia	http://www.ontobee.org/ontology/DOID?iri=http://purl.obolibrary.org/obo/DOID_12603	6	99	0.538424	0.651231	BCL2;FAS;IL10;MXD1;PTAFR;RUNX1T1
DOID:9455	lipid storage disease	http://www.ontobee.org/ontology/DOID?iri=http://purl.obolibrary.org/obo/DOID_9455	7	117	0.546225	0.656723	ADIPOR2;ADRB2;AGER;FAS;IL10;MIF;SCD
DOID:628	combined T cell and B cell immunodeficiency	http://www.ontobee.org/ontology/DOID?iri=http://purl.obolibrary.org/obo/DOID_628	3	48	0.548099	0.656723	CHD7;HIF3A;RAG1
DOID:987	alopecia	http://www.ontobee.org/ontology/DOID?iri=http://purl.obolibrary.org/obo/DOID_987	3	48	0.548099	0.656723	FAS;FASLG;MBTPS2
DOID:10808	gastric ulcer	http://www.ontobee.org/ontology/DOID?iri=http://purl.obolibrary.org/obo/DOID_10808	1	13	0.548499	0.656723	EDN1
DOID:13001	carotid stenosis	http://www.ontobee.org/ontology/DOID?iri=http://purl.obolibrary.org/obo/DOID_13001	1	13	0.548499	0.656723	FASLG
DOID:1935	Bardet-Biedl syndrome	http://www.ontobee.org/ontology/DOID?iri=http://purl.obolibrary.org/obo/DOID_1935	1	13	0.548499	0.656723	CCDC28B
DOID:3086	gingival overgrowth	http://www.ontobee.org/ontology/DOID?iri=http://purl.obolibrary.org/obo/DOID_3086	1	13	0.548499	0.656723	EDN1
DOID:6204	follicular adenoma	http://www.ontobee.org/ontology/DOID?iri=http://purl.obolibrary.org/obo/DOID_6204	1	13	0.548499	0.656723	CCND1
DOID:841	extrinsic allergic alveolitis	http://www.ontobee.org/ontology/DOID?iri=http://purl.obolibrary.org/obo/DOID_841	1	13	0.548499	0.656723	IL18
DOID:1441	spinocerebellar ataxia	http://www.ontobee.org/ontology/DOID?iri=http://purl.obolibrary.org/obo/DOID_1441	2	31	0.556332	0.664611	ATXN1;TARDBP
DOID:2478	spinocerebellar degeneration	http://www.ontobee.org/ontology/DOID?iri=http://purl.obolibrary.org/obo/DOID_2478	2	31	0.556332	0.664611	ATXN1;TARDBP
DOID:230	lateral sclerosis	http://www.ontobee.org/ontology/DOID?iri=http://purl.obolibrary.org/obo/DOID_230	6	101	0.55836	0.666288	AIFM1;CASP3;NEFM;TARDBP;TNFRSF1B;VAPA
DOID:6364	migraine	http://www.ontobee.org/ontology/DOID?iri=http://purl.obolibrary.org/obo/DOID_6364	4	67	0.567812	0.675952	ADRB2;EDN1;INSR;KCNN3
DOID:62	aortic valve disease	http://www.ontobee.org/ontology/DOID?iri=http://purl.obolibrary.org/obo/DOID_62	2	32	0.573797	0.675952	AGER;EDN1
DOID:10493	adrenal cortical hypofunction	http://www.ontobee.org/ontology/DOID?iri=http://purl.obolibrary.org/obo/DOID_10493	1	14	0.575319	0.675952	CLEC16A
DOID:11202	primary hyperparathyroidism	http://www.ontobee.org/ontology/DOID?iri=http://purl.obolibrary.org/obo/DOID_11202	1	14	0.575319	0.675952	COL1A1
DOID:11465	autonomic nervous system disease	http://www.ontobee.org/ontology/DOID?iri=http://purl.obolibrary.org/obo/DOID_11465	1	14	0.575319	0.675952	NGF
DOID:12206	dengue hemorrhagic fever	http://www.ontobee.org/ontology/DOID?iri=http://purl.obolibrary.org/obo/DOID_12206	1	14	0.575319	0.675952	IL10
DOID:14268	sclerosing cholangitis	http://www.ontobee.org/ontology/DOID?iri=http://purl.obolibrary.org/obo/DOID_14268	1	14	0.575319	0.675952	ICOS
DOID:214	teeth hard tissue disease	http://www.ontobee.org/ontology/DOID?iri=http://purl.obolibrary.org/obo/DOID_214	1	14	0.575319	0.675952	IL18
DOID:2226	chronic myeloproliferative disease	http://www.ontobee.org/ontology/DOID?iri=http://purl.obolibrary.org/obo/DOID_2226	1	14	0.575319	0.675952	BCL2L1
DOID:2891	thyroid adenoma	http://www.ontobee.org/ontology/DOID?iri=http://purl.obolibrary.org/obo/DOID_2891	1	14	0.575319	0.675952	CCND1
DOID:4539	labyrinthine disease	http://www.ontobee.org/ontology/DOID?iri=http://purl.obolibrary.org/obo/DOID_4539	1	14	0.575319	0.675952	COL1A1
DOID:5408	Paget's disease of bone	http://www.ontobee.org/ontology/DOID?iri=http://purl.obolibrary.org/obo/DOID_5408	1	14	0.575319	0.675952	CCND1
DOID:9563	bronchiectasis	http://www.ontobee.org/ontology/DOID?iri=http://purl.obolibrary.org/obo/DOID_9563	1	14	0.575319	0.675952	ADRB2
DOID:9667	placental abruption	http://www.ontobee.org/ontology/DOID?iri=http://purl.obolibrary.org/obo/DOID_9667	1	14	0.575319	0.675952	IL10
DOID:9778	irritable bowel syndrome	http://www.ontobee.org/ontology/DOID?iri=http://purl.obolibrary.org/obo/DOID_9778	4	68	0.579721	0.680375	ICOS;IL10;MIF;SCN5A
DOID:0050700	cardiomyopathy	http://www.ontobee.org/ontology/DOID?iri=http://purl.obolibrary.org/obo/DOID_0050700	8	139	0.58694	0.688034	ADRB1;ADRB2;FAS;FKRP;IGF1R;MYH7;SCN5A;TP53
DOID:583	hemolytic anemia	http://www.ontobee.org/ontology/DOID?iri=http://purl.obolibrary.org/obo/DOID_583	3	51	0.589843	0.688034	CDKN1A;IL10;PIGA
DOID:720	normocytic anemia	http://www.ontobee.org/ontology/DOID?iri=http://purl.obolibrary.org/obo/DOID_720	3	51	0.589843	0.688034	CDKN1A;IL10;PIGA
DOID:1272	telangiectasis	http://www.ontobee.org/ontology/DOID?iri=http://purl.obolibrary.org/obo/DOID_1272	2	33	0.590756	0.688034	CDKN1A;TP53
DOID:5158	pleural cancer	http://www.ontobee.org/ontology/DOID?iri=http://purl.obolibrary.org/obo/DOID_5158	2	33	0.590756	0.688034	CDKN1A;TP53
DOID:7474	malignant pleural mesothelioma	http://www.ontobee.org/ontology/DOID?iri=http://purl.obolibrary.org/obo/DOID_7474	2	33	0.590756	0.688034	CDKN1A;TP53
DOID:811	lipodystrophy	http://www.ontobee.org/ontology/DOID?iri=http://purl.obolibrary.org/obo/DOID_811	2	33	0.590756	0.688034	FAS;IL18
DOID:14330	Parkinson's disease	http://www.ontobee.org/ontology/DOID?iri=http://purl.obolibrary.org/obo/DOID_14330	9	158	0.598925	0.695647	BCL2L1;CASP3;FAS;IL10;MEF2D;RB1;TARDBP;TP53;YWHAZ
DOID:2377	multiple sclerosis	http://www.ontobee.org/ontology/DOID?iri=http://purl.obolibrary.org/obo/DOID_2377	9	158	0.598925	0.695647	BCL2L1;CCL7;CCR7;FAS;FASLG;FCGR3B;IL10;IL13;IL18
DOID:10762	portal hypertension	http://www.ontobee.org/ontology/DOID?iri=http://purl.obolibrary.org/obo/DOID_10762	1	15	0.600549	0.695647	ITGB3
DOID:2048	autoimmune hepatitis	http://www.ontobee.org/ontology/DOID?iri=http://purl.obolibrary.org/obo/DOID_2048	1	15	0.600549	0.695647	FAS
DOID:3457	invasive lobular carcinoma	http://www.ontobee.org/ontology/DOID?iri=http://purl.obolibrary.org/obo/DOID_3457	1	15	0.600549	0.695647	CHEK2
DOID:440	neuromuscular disease	http://www.ontobee.org/ontology/DOID?iri=http://purl.obolibrary.org/obo/DOID_440	8	141	0.60337	0.698158	BCL2;CAPN3;FKRP;HOXD10;IL10;MYH7;SLC25A4;UTRN
DOID:13207	proliferative diabetic retinopathy	http://www.ontobee.org/ontology/DOID?iri=http://purl.obolibrary.org/obo/DOID_13207	2	34	0.607209	0.701839	AGER;EDN1
DOID:3996	urinary system cancer	http://www.ontobee.org/ontology/DOID?iri=http://purl.obolibrary.org/obo/DOID_3996	26	455	0.610058	0.704369	BCL2;BCL2L1;CASP5;CCND1;CDKN1A;CYP19A1;DAPK1;DUSP1;EDN1;FASLG;FCGR3B;IGF1R;IGF2BP3;IL13;IL18;KRAS;PRKCZ;RALB;RB1;ROR2;S1PR2;SLC4A4;SOX9;TGFBR3;THBS1;TP53
DOID:936	brain disease	http://www.ontobee.org/ontology/DOID?iri=http://purl.obolibrary.org/obo/DOID_936	24	421	0.612629	0.706574	ABCC5;ADRB2;AGER;ATP6V0C;CACNB4;CASP3;CLDN11;DAPK1;EDN1;FAS;FASLG;IL10;IL18;INSR;KCNA1;KCNMB1;KCNN3;SCN5A;SOCS1;SYT1;TARDBP;TNFRSF1B;UNC93B1;WASL
DOID:1036	chronic leukemia	http://www.ontobee.org/ontology/DOID?iri=http://purl.obolibrary.org/obo/DOID_1036	17	300	0.6145	0.707788	BCL2;BCL2L1;CCL21;CCND1;CCR7;CHEK2;CXCR5;DAPK1;FAS;FASLG;MYCN;PDGFB;PEG10;PMAIP1;RAP1GDS1;TP53;TP73
DOID:11714	gestational diabetes	http://www.ontobee.org/ontology/DOID?iri=http://purl.obolibrary.org/obo/DOID_11714	3	53	0.616258	0.707788	ADRB3;AGER;PDX1
DOID:4535	hypotrichosis	http://www.ontobee.org/ontology/DOID?iri=http://purl.obolibrary.org/obo/DOID_4535	3	53	0.616258	0.707788	FAS;FASLG;MBTPS2
DOID:0060038	specific developmental disorder	http://www.ontobee.org/ontology/DOID?iri=http://purl.obolibrary.org/obo/DOID_0060038	10	179	0.624215	0.707788	FKRP;GTF2I;HDAC4;HOXA1;NRGN;POMT1;SMC1A;TP53;ZEB2;ZFYVE26
DOID:0060033	autoimmune disease of peripheral nervous system	http://www.ontobee.org/ontology/DOID?iri=http://purl.obolibrary.org/obo/DOID_0060033	1	16	0.624285	0.707788	FAS
DOID:11722	myotonic dystrophy type 1	http://www.ontobee.org/ontology/DOID?iri=http://purl.obolibrary.org/obo/DOID_11722	1	16	0.624285	0.707788	INSR
DOID:11729	Lyme disease	http://www.ontobee.org/ontology/DOID?iri=http://purl.obolibrary.org/obo/DOID_11729	1	16	0.624285	0.707788	CCR7
DOID:12205	dengue disease	http://www.ontobee.org/ontology/DOID?iri=http://purl.obolibrary.org/obo/DOID_12205	1	16	0.624285	0.707788	IL10
DOID:1273	respiratory syncytial virus infectious disease	http://www.ontobee.org/ontology/DOID?iri=http://purl.obolibrary.org/obo/DOID_1273	1	16	0.624285	0.707788	IL18
DOID:12842	Guillain-Barre syndrome	http://www.ontobee.org/ontology/DOID?iri=http://purl.obolibrary.org/obo/DOID_12842	1	16	0.624285	0.707788	FAS
DOID:1508	candidiasis	http://www.ontobee.org/ontology/DOID?iri=http://purl.obolibrary.org/obo/DOID_1508	1	16	0.624285	0.707788	IL10
DOID:1969	cerebral palsy	http://www.ontobee.org/ontology/DOID?iri=http://purl.obolibrary.org/obo/DOID_1969	1	16	0.624285	0.707788	IL18
DOID:302	substance abuse	http://www.ontobee.org/ontology/DOID?iri=http://purl.obolibrary.org/obo/DOID_302	1	16	0.624285	0.707788	KRAS
DOID:5241	hemangioblastoma	http://www.ontobee.org/ontology/DOID?iri=http://purl.obolibrary.org/obo/DOID_5241	1	16	0.624285	0.707788	CCND1
DOID:9637	stomatitis	http://www.ontobee.org/ontology/DOID?iri=http://purl.obolibrary.org/obo/DOID_9637	1	16	0.624285	0.707788	IKBKE
DOID:9675	pulmonary emphysema	http://www.ontobee.org/ontology/DOID?iri=http://purl.obolibrary.org/obo/DOID_9675	1	16	0.624285	0.707788	RAP1A
DOID:3962	follicular thyroid carcinoma	http://www.ontobee.org/ontology/DOID?iri=http://purl.obolibrary.org/obo/DOID_3962	3	54	0.629029	0.71241	CCND1;KRAS;THBS1
DOID:0050686	organ system cancer	http://www.ontobee.org/ontology/DOID?iri=http://purl.obolibrary.org/obo/DOID_0050686	159	2727	0.632626	0.715725	ABCC5;ADAM12;ADAM15;ADAMTS8;ADIPOR2;ADRB2;AFF1;AGER;AHR;AIFM1;ARG2;ARID3A;ARL4D;ATF2;ATP2A2;ATP6V0C;BCAT1;BCL2;BCL2L1;BMP5;BTG2;CASP3;CASP5;CCL21;CCND1;CCR7;CD86;CDC25A;CDH5;CDK6;CDKN1A;CEBPD;CHEK2;CHFR;CHUK;COIL;COL1A1;COL1A2;COL4A6;CRK;CRMP1;CXCR5;CYP19A1;DAPK1;DKK3;DNAJB1;DUSP1;DUSP4;E2F5;EDN1;EIF4G2;ELF4;EPHA3;EPHA4;FAS;FASLG;FBN2;FCGR3B;FZD4;GAS7;GIPC1;GTF2I;HAS2;HBEGF;HDAC4;HMGA1;HMGA2;HOXA…
DOID:6432	pulmonary hypertension	http://www.ontobee.org/ontology/DOID?iri=http://purl.obolibrary.org/obo/DOID_6432	4	73	0.636339	0.718737	ARG2;EDN1;LYVE1;MIF
DOID:2723	dermatitis	http://www.ontobee.org/ontology/DOID?iri=http://purl.obolibrary.org/obo/DOID_2723	9	163	0.636634	0.718737	CASP3;CDKN1A;IL10;IL13;IL18;IL25;ITGB3;MIF;NGF
DOID:3713	ovary adenocarcinoma	http://www.ontobee.org/ontology/DOID?iri=http://purl.obolibrary.org/obo/DOID_3713	2	36	0.638598	0.719433	ITGB3;TP53
DOID:783	end stage renal failure	http://www.ontobee.org/ontology/DOID?iri=http://purl.obolibrary.org/obo/DOID_783	2	36	0.638598	0.719433	FCGR3B;IL10
DOID:6590	spondylitis	http://www.ontobee.org/ontology/DOID?iri=http://purl.obolibrary.org/obo/DOID_6590	3	55	0.641504	0.721186	IL10;IL18;TNFRSF1B
DOID:7147	ankylosing spondylitis	http://www.ontobee.org/ontology/DOID?iri=http://purl.obolibrary.org/obo/DOID_7147	3	55	0.641504	0.721186	IL10;IL18;TNFRSF1B
DOID:3213	demyelinating disease	http://www.ontobee.org/ontology/DOID?iri=http://purl.obolibrary.org/obo/DOID_3213	9	164	0.643942	0.723165	BCL2L1;CCL7;CCR7;FAS;FASLG;FCGR3B;IL10;IL13;IL18
DOID:6039	uveal melanoma	http://www.ontobee.org/ontology/DOID?iri=http://purl.obolibrary.org/obo/DOID_6039	1	17	0.646613	0.725402	CCND1
DOID:3310	atopic dermatitis	http://www.ontobee.org/ontology/DOID?iri=http://purl.obolibrary.org/obo/DOID_3310	7	129	0.650574	0.729079	CASP3;CDKN1A;IL10;IL13;IL18;IL25;NGF
DOID:10763	hypertension	http://www.ontobee.org/ontology/DOID?iri=http://purl.obolibrary.org/obo/DOID_10763	30	534	0.652888	0.730906	ADAM12;ADRB1;ADRB2;ADRB3;AGER;ARG2;ATP2A2;CHEK2;CYP19A1;EDN1;FAS;FASLG;GHR;HBEGF;ICOS;IGF1R;IL10;IL18;INSR;ITGB3;KCNMB1;LYVE1;MIF;OLR1;PAPPA;PTPRU;TGFBR1;TGFBR3;TNFRSF1B;YY1
DOID:11260	rabies	http://www.ontobee.org/ontology/DOID?iri=http://purl.obolibrary.org/obo/DOID_11260	3	56	0.653682	0.731029	BCL2;BCL2L1;CASP3
DOID:4138	bile duct disease	http://www.ontobee.org/ontology/DOID?iri=http://purl.obolibrary.org/obo/DOID_4138	4	75	0.657556	0.734592	EDN1;FAS;ICOS;TP53
DOID:10124	corneal disease	http://www.ontobee.org/ontology/DOID?iri=http://purl.obolibrary.org/obo/DOID_10124	3	57	0.665562	0.734715	CDKN1A;S100A2;TP53
DOID:12252	Cushing's syndrome	http://www.ontobee.org/ontology/DOID?iri=http://purl.obolibrary.org/obo/DOID_12252	1	18	0.667618	0.734715	IL18
DOID:1752	ocular melanoma	http://www.ontobee.org/ontology/DOID?iri=http://purl.obolibrary.org/obo/DOID_1752	1	18	0.667618	0.734715	CCND1
DOID:1921	Klinefelter's syndrome	http://www.ontobee.org/ontology/DOID?iri=http://purl.obolibrary.org/obo/DOID_1921	1	18	0.667618	0.734715	CHD7
DOID:2730	epidermolysis bullosa	http://www.ontobee.org/ontology/DOID?iri=http://purl.obolibrary.org/obo/DOID_2730	1	18	0.667618	0.734715	COL1A1
DOID:3407	carotid artery disease	http://www.ontobee.org/ontology/DOID?iri=http://purl.obolibrary.org/obo/DOID_3407	1	18	0.667618	0.734715	FASLG
DOID:447	renal tubular transport disease	http://www.ontobee.org/ontology/DOID?iri=http://purl.obolibrary.org/obo/DOID_447	1	18	0.667618	0.734715	SLC4A4
DOID:5214	demyelinating polyneuropathy	http://www.ontobee.org/ontology/DOID?iri=http://purl.obolibrary.org/obo/DOID_5214	1	18	0.667618	0.734715	FAS
DOID:53	pituitary gland disease	http://www.ontobee.org/ontology/DOID?iri=http://purl.obolibrary.org/obo/DOID_53	1	18	0.667618	0.734715	GHR
DOID:607	paraplegia	http://www.ontobee.org/ontology/DOID?iri=http://purl.obolibrary.org/obo/DOID_607	1	18	0.667618	0.734715	ZFYVE26
DOID:2921	glomerulonephritis	http://www.ontobee.org/ontology/DOID?iri=http://purl.obolibrary.org/obo/DOID_2921	4	76	0.667847	0.734715	IL10;IL18;MIF;PTPRU
DOID:9741	biliary tract disease	http://www.ontobee.org/ontology/DOID?iri=http://purl.obolibrary.org/obo/DOID_9741	4	76	0.667847	0.734715	EDN1;FAS;ICOS;TP53
DOID:11077	brucellosis	http://www.ontobee.org/ontology/DOID?iri=http://purl.obolibrary.org/obo/DOID_11077	2	38	0.667986	0.734715	IL10;PSMB8
DOID:3405	histiocytosis	http://www.ontobee.org/ontology/DOID?iri=http://purl.obolibrary.org/obo/DOID_3405	2	38	0.667986	0.734715	CCR7;TP53
DOID:5157	benign pleural mesothelioma	http://www.ontobee.org/ontology/DOID?iri=http://purl.obolibrary.org/obo/DOID_5157	2	38	0.667986	0.734715	CDKN1A;TP53
DOID:263	kidney cancer	http://www.ontobee.org/ontology/DOID?iri=http://purl.obolibrary.org/obo/DOID_263	22	399	0.673351	0.739854	BCL2;BCL2L1;CCND1;CDKN1A;CYP19A1;DAPK1;DUSP1;EDN1;FASLG;FCGR3B;IGF1R;IGF2BP3;IL18;KRAS;PRKCZ;ROR2;S1PR2;SLC4A4;SOX9;TGFBR3;THBS1;TP53
DOID:1389	polyneuropathy	http://www.ontobee.org/ontology/DOID?iri=http://purl.obolibrary.org/obo/DOID_1389	2	39	0.681942	0.748	FAS;SLC25A4
DOID:4451	renal carcinoma	http://www.ontobee.org/ontology/DOID?iri=http://purl.obolibrary.org/obo/DOID_4451	19	348	0.682165	0.748	BCL2;BCL2L1;CCND1;CDKN1A;DAPK1;DUSP1;EDN1;FASLG;FCGR3B;IGF1R;IGF2BP3;IL18;KRAS;PRKCZ;ROR2;SLC4A4;TGFBR3;THBS1;TP53
DOID:231	motor neuron disease	http://www.ontobee.org/ontology/DOID?iri=http://purl.obolibrary.org/obo/DOID_231	9	170	0.686033	0.749867	AIFM1;CASP3;IL13;NEFM;SYNCRIP;TARDBP;TNFRSF1B;UBE2H;VAPA
DOID:12377	spinal muscular atrophy	http://www.ontobee.org/ontology/DOID?iri=http://purl.obolibrary.org/obo/DOID_12377	1	19	0.687378	0.749867	SYNCRIP
DOID:2731	vesiculobullous skin disease	http://www.ontobee.org/ontology/DOID?iri=http://purl.obolibrary.org/obo/DOID_2731	1	19	0.687378	0.749867	COL1A1
DOID:3369	peripheral primitive neuroectodermal tumor	http://www.ontobee.org/ontology/DOID?iri=http://purl.obolibrary.org/obo/DOID_3369	1	19	0.687378	0.749867	PDGFB
DOID:450	myotonic disease	http://www.ontobee.org/ontology/DOID?iri=http://purl.obolibrary.org/obo/DOID_450	1	19	0.687378	0.749867	INSR
DOID:1289	neurodegenerative disease	http://www.ontobee.org/ontology/DOID?iri=http://purl.obolibrary.org/obo/DOID_1289	42	755	0.699077	0.761439	ADRB1;ADRB2;AGER;AIFM1;APBA1;ATXN1;BACE2;BCL2L1;CASP3;CCL7;CCR7;CHEK2;CYP19A1;CYP46A1;DAPK1;DKK3;DYRK1A;FAS;FASLG;FCGR3B;IL10;IL13;IL18;KPNA1;MEF2D;MIF;NEFM;OLR1;PPP3CA;RB1;SLC30A1;SLC30A4;SLC30A6;SYNCRIP;TARDBP;TNFRSF1B;TP53;TP73;UBE2H;VAPA;VSNL1;YWHAZ
DOID:576	proteinuria	http://www.ontobee.org/ontology/DOID?iri=http://purl.obolibrary.org/obo/DOID_576	3	60	0.699412	0.761439	PIGA;PSMB8;THBS1
DOID:10754	otitis media	http://www.ontobee.org/ontology/DOID?iri=http://purl.obolibrary.org/obo/DOID_10754	1	20	0.705966	0.767011	IL10
DOID:649	prion disease	http://www.ontobee.org/ontology/DOID?iri=http://purl.obolibrary.org/obo/DOID_649	1	20	0.705966	0.767011	TARDBP
DOID:2490	congenital nervous system abnormality	http://www.ontobee.org/ontology/DOID?iri=http://purl.obolibrary.org/obo/DOID_2490	2	41	0.708415	0.768109	DYRK1A;POMT1
DOID:3952	adrenal cortex disease	http://www.ontobee.org/ontology/DOID?iri=http://purl.obolibrary.org/obo/DOID_3952	2	41	0.708415	0.768109	CLEC16A;IL18
DOID:1883	hepatitis C	http://www.ontobee.org/ontology/DOID?iri=http://purl.obolibrary.org/obo/DOID_1883	11	212	0.72088	0.780115	ADIPOR2;CCL21;CDKN1A;FAS;FASLG;IL10;IL18;RB1;SOCS1;THBS1;TP53
DOID:9553	adrenal gland disease	http://www.ontobee.org/ontology/DOID?iri=http://purl.obolibrary.org/obo/DOID_9553	2	42	0.720949	0.780115	CLEC16A;IL18
DOID:12554	hemolytic-uremic syndrome	http://www.ontobee.org/ontology/DOID?iri=http://purl.obolibrary.org/obo/DOID_12554	1	21	0.723452	0.78124	CDKN1A
DOID:2214	inherited blood coagulation disease	http://www.ontobee.org/ontology/DOID?iri=http://purl.obolibrary.org/obo/DOID_2214	1	21	0.723452	0.78124	ITGB3
DOID:409	liver disease	http://www.ontobee.org/ontology/DOID?iri=http://purl.obolibrary.org/obo/DOID_409	30	555	0.734512	0.791715	ADIPOR2;ADRB3;AGER;BCL2;CASP3;CCL21;CCND1;CDKN1A;CHUK;DNAJB1;EDN1;FAS;FASLG;GHR;ICOS;IL10;IL18;IRS2;KCTD9;KRAS;MIF;PRKCZ;RB1;SEC63;SOCS1;STEAP3;THBS1;TNFRSF1B;TNFSF9;TP53
DOID:526	Human immunodeficiency virus infectious disease	http://www.ontobee.org/ontology/DOID?iri=http://purl.obolibrary.org/obo/DOID_526	8	159	0.734634	0.791715	BCL2;CCL21;CXCR5;FAS;FASLG;IL10;IL18;TP53
DOID:11723	Duchenne muscular dystrophy	http://www.ontobee.org/ontology/DOID?iri=http://purl.obolibrary.org/obo/DOID_11723	1	22	0.7399	0.793387	UTRN
DOID:14221	metabolic syndrome X	http://www.ontobee.org/ontology/DOID?iri=http://purl.obolibrary.org/obo/DOID_14221	1	22	0.7399	0.793387	IL10
DOID:1681	heart septal defect	http://www.ontobee.org/ontology/DOID?iri=http://purl.obolibrary.org/obo/DOID_1681	1	22	0.7399	0.793387	TBX5
DOID:272	hepatic vascular disease	http://www.ontobee.org/ontology/DOID?iri=http://purl.obolibrary.org/obo/DOID_272	1	22	0.7399	0.793387	ITGB3
DOID:9252	amino acid metabolic disorder	http://www.ontobee.org/ontology/DOID?iri=http://purl.obolibrary.org/obo/DOID_9252	1	22	0.7399	0.793387	IVD
DOID:331	central nervous system disease	http://www.ontobee.org/ontology/DOID?iri=http://purl.obolibrary.org/obo/DOID_331	58	1047	0.741082	0.793857	ABCC5;ADRB1;ADRB2;AGER;AIFM1;APBA1;ATP6V0C;ATXN1;BACE2;BCL2L1;CACNB4;CASP3;CCL7;CCR7;CHEK2;CLDN11;COL1A1;CYP19A1;CYP46A1;DAPK1;DKK3;DYRK1A;EDN1;FAS;FASLG;FCGR3B;IL10;IL13;IL18;INSR;KCNA1;KCNMB1;KCNN3;KPNA1;MEF2D;MIF;NEFM;OLR1;PPP3CA;RB1;SCN5A;SLC30A1;SLC30A4;SLC30A6;SOCS1;SYNCRIP;SYT1;TARDBP;TNFRSF1B;TP53;TP73;UBE2H;UNC93B1;VAPA;VSNL1;WASL;YWHAZ;ZFYVE26
DOID:332	amyotrophic lateral sclerosis	http://www.ontobee.org/ontology/DOID?iri=http://purl.obolibrary.org/obo/DOID_332	7	142	0.745994	0.798318	AIFM1;CASP3;IL13;TARDBP;TNFRSF1B;UBE2H;VAPA
DOID:8577	ulcerative colitis	http://www.ontobee.org/ontology/DOID?iri=http://purl.obolibrary.org/obo/DOID_8577	3	65	0.749949	0.801747	CCL21;IL13;MIF
DOID:10126	keratoconus	http://www.ontobee.org/ontology/DOID?iri=http://purl.obolibrary.org/obo/DOID_10126	1	23	0.755373	0.803524	S100A2
DOID:13515	tuberous sclerosis	http://www.ontobee.org/ontology/DOID?iri=http://purl.obolibrary.org/obo/DOID_13515	1	23	0.755373	0.803524	TSC1
DOID:13810	familial hypercholesterolemia	http://www.ontobee.org/ontology/DOID?iri=http://purl.obolibrary.org/obo/DOID_13810	1	23	0.755373	0.803524	IL10
DOID:6543	acne	http://www.ontobee.org/ontology/DOID?iri=http://purl.obolibrary.org/obo/DOID_6543	1	23	0.755373	0.803524	TNFRSF1B
DOID:9098	sebaceous gland disease	http://www.ontobee.org/ontology/DOID?iri=http://purl.obolibrary.org/obo/DOID_9098	1	23	0.755373	0.803524	TNFRSF1B
DOID:13809	familial combined hyperlipidemia	http://www.ontobee.org/ontology/DOID?iri=http://purl.obolibrary.org/obo/DOID_13809	1	24	0.769928	0.817378	SCD
DOID:5113	nutritional deficiency disease	http://www.ontobee.org/ontology/DOID?iri=http://purl.obolibrary.org/obo/DOID_5113	1	24	0.769928	0.817378	EDN1
DOID:5419	schizophrenia	http://www.ontobee.org/ontology/DOID?iri=http://purl.obolibrary.org/obo/DOID_5419	30	566	0.772351	0.819137	ACSL6;ADAM12;AGER;CASP3;DGCR2;DNAJB1;FZD3;GABRA6;GNAL;HDAC4;HMGA1;IL10;IL18;KCNN3;KIF2A;NEFM;NPTN;NRGN;PDGFB;PPP3CA;SLC1A4;SLC6A5;TAGLN3;TBX1;TNFRSF1B;TP53;VSNL1;XK;YWHAH;YWHAZ
DOID:2468	psychotic disorder	http://www.ontobee.org/ontology/DOID?iri=http://purl.obolibrary.org/obo/DOID_2468	30	569	0.782045	0.823725	ACSL6;ADAM12;AGER;CASP3;DGCR2;DNAJB1;FZD3;GABRA6;GNAL;HDAC4;HMGA1;IL10;IL18;KCNN3;KIF2A;NEFM;NPTN;NRGN;PDGFB;PPP3CA;SLC1A4;SLC6A5;TAGLN3;TBX1;TNFRSF1B;TP53;VSNL1;XK;YWHAH;YWHAZ
DOID:0002116	pterygium	http://www.ontobee.org/ontology/DOID?iri=http://purl.obolibrary.org/obo/DOID_0002116	1	25	0.783618	0.823725	TP53
DOID:10139	conjunctival degeneration	http://www.ontobee.org/ontology/DOID?iri=http://purl.obolibrary.org/obo/DOID_10139	1	25	0.783618	0.823725	TP53
DOID:10526	conjunctival pterygium	http://www.ontobee.org/ontology/DOID?iri=http://purl.obolibrary.org/obo/DOID_10526	1	25	0.783618	0.823725	TP53
DOID:13141	uveitis	http://www.ontobee.org/ontology/DOID?iri=http://purl.obolibrary.org/obo/DOID_13141	1	25	0.783618	0.823725	FAS
DOID:1724	duodenal ulcer	http://www.ontobee.org/ontology/DOID?iri=http://purl.obolibrary.org/obo/DOID_1724	1	25	0.783618	0.823725	TP53
DOID:1924	hypogonadism	http://www.ontobee.org/ontology/DOID?iri=http://purl.obolibrary.org/obo/DOID_1924	1	25	0.783618	0.823725	CHD7
DOID:3978	extrinsic cardiomyopathy	http://www.ontobee.org/ontology/DOID?iri=http://purl.obolibrary.org/obo/DOID_3978	1	25	0.783618	0.823725	FAS
DOID:820	myocarditis	http://www.ontobee.org/ontology/DOID?iri=http://purl.obolibrary.org/obo/DOID_820	1	25	0.783618	0.823725	FAS
DOID:3328	temporal lobe epilepsy	http://www.ontobee.org/ontology/DOID?iri=http://purl.obolibrary.org/obo/DOID_3328	2	48	0.786925	0.825576	CASP3;DAPK1
DOID:4079	heart valve disease	http://www.ontobee.org/ontology/DOID?iri=http://purl.obolibrary.org/obo/DOID_4079	2	48	0.786925	0.825576	AGER;EDN1
DOID:6713	cerebrovascular disease	http://www.ontobee.org/ontology/DOID?iri=http://purl.obolibrary.org/obo/DOID_6713	5	110	0.789578	0.827546	CASP3;COL1A2;FASLG;FBN2;OLR1
DOID:2018	hyperinsulinism	http://www.ontobee.org/ontology/DOID?iri=http://purl.obolibrary.org/obo/DOID_2018	2	49	0.796484	0.831533	INSR;PRKCZ
DOID:10159	osteonecrosis	http://www.ontobee.org/ontology/DOID?iri=http://purl.obolibrary.org/obo/DOID_10159	1	26	0.796497	0.831533	TP53
DOID:184	bone cancer	http://www.ontobee.org/ontology/DOID?iri=http://purl.obolibrary.org/obo/DOID_184	1	26	0.796497	0.831533	IGF1R
DOID:3947	adrenal gland hyperfunction	http://www.ontobee.org/ontology/DOID?iri=http://purl.obolibrary.org/obo/DOID_3947	1	26	0.796497	0.831533	IL18
DOID:438	autoimmune disease of the nervous system	http://www.ontobee.org/ontology/DOID?iri=http://purl.obolibrary.org/obo/DOID_438	2	50	0.805663	0.840281	FAS;IL10
DOID:655	inherited metabolic disorder	http://www.ontobee.org/ontology/DOID?iri=http://purl.obolibrary.org/obo/DOID_655	15	304	0.807752	0.841638	ADIPOR2;ADRB2;AGER;CTNS;FAS;GALE;GNPTAB;IGF1R;IL10;IVD;KCNJ3;MIF;PAPPA;SCD;TGFBR3
DOID:3118	hepatobiliary disease	http://www.ontobee.org/ontology/DOID?iri=http://purl.obolibrary.org/obo/DOID_3118	30	578	0.80949	0.842627	ADIPOR2;ADRB3;AGER;BCL2;CASP3;CCL21;CCND1;CDKN1A;CHUK;DNAJB1;EDN1;FAS;FASLG;GHR;ICOS;IL10;IL18;IRS2;KCTD9;KRAS;MIF;PRKCZ;RB1;SEC63;SOCS1;STEAP3;THBS1;TNFRSF1B;TNFSF9;TP53
DOID:10595	Charcot-Marie-Tooth disease	http://www.ontobee.org/ontology/DOID?iri=http://purl.obolibrary.org/obo/DOID_10595	1	28	0.820005	0.851084	HOXD10
DOID:13189	gout	http://www.ontobee.org/ontology/DOID?iri=http://purl.obolibrary.org/obo/DOID_13189	1	28	0.820005	0.851084	ADRB3
DOID:1712	aortic valve stenosis	http://www.ontobee.org/ontology/DOID?iri=http://purl.obolibrary.org/obo/DOID_1712	1	28	0.820005	0.851084	AGER
DOID:1184	nephrotic syndrome	http://www.ontobee.org/ontology/DOID?iri=http://purl.obolibrary.org/obo/DOID_1184	2	52	0.822923	0.853283	IL18;PSMB8
DOID:9588	encephalitis	http://www.ontobee.org/ontology/DOID?iri=http://purl.obolibrary.org/obo/DOID_9588	2	53	0.831027	0.860851	CLDN11;UNC93B1
DOID:10579	leukodystrophy	http://www.ontobee.org/ontology/DOID?iri=http://purl.obolibrary.org/obo/DOID_10579	3	76	0.837171	0.865541	IL10;TARDBP;TNFRSF1B
DOID:13580	cholestasis	http://www.ontobee.org/ontology/DOID?iri=http://purl.obolibrary.org/obo/DOID_13580	2	54	0.838796	0.865541	EDN1;TP53
DOID:1428	endocrine pancreas disease	http://www.ontobee.org/ontology/DOID?iri=http://purl.obolibrary.org/obo/DOID_1428	2	54	0.838796	0.865541	INSR;PRKCZ
DOID:2527	nephrosis	http://www.ontobee.org/ontology/DOID?iri=http://purl.obolibrary.org/obo/DOID_2527	2	54	0.838796	0.865541	IL18;PSMB8
DOID:1168	familial hyperlipidemia	http://www.ontobee.org/ontology/DOID?iri=http://purl.obolibrary.org/obo/DOID_1168	3	78	0.84986	0.873178	IL10;PAPPA;SCD
DOID:0060121	integumentary system benign neoplasm	http://www.ontobee.org/ontology/DOID?iri=http://purl.obolibrary.org/obo/DOID_0060121	1	31	0.850286	0.873178	SOX2
DOID:11830	myopia	http://www.ontobee.org/ontology/DOID?iri=http://purl.obolibrary.org/obo/DOID_11830	1	31	0.850286	0.873178	COL1A1
DOID:3165	skin benign neoplasm	http://www.ontobee.org/ontology/DOID?iri=http://purl.obolibrary.org/obo/DOID_3165	1	31	0.850286	0.873178	SOX2
DOID:3277	thymus cancer	http://www.ontobee.org/ontology/DOID?iri=http://purl.obolibrary.org/obo/DOID_3277	1	31	0.850286	0.873178	BCL2L1
DOID:14250	Down syndrome	http://www.ontobee.org/ontology/DOID?iri=http://purl.obolibrary.org/obo/DOID_14250	2	56	0.853373	0.873828	CASP3;THBS1
DOID:2462	retinal vascular disease	http://www.ontobee.org/ontology/DOID?iri=http://purl.obolibrary.org/obo/DOID_2462	2	56	0.853373	0.873828	AGER;EDN1
DOID:8947	diabetic retinopathy	http://www.ontobee.org/ontology/DOID?iri=http://purl.obolibrary.org/obo/DOID_8947	2	56	0.853373	0.873828	AGER;EDN1
DOID:12217	Lewy body dementia	http://www.ontobee.org/ontology/DOID?iri=http://purl.obolibrary.org/obo/DOID_12217	1	32	0.859205	0.878957	TARDBP
DOID:2234	focal epilepsy	http://www.ontobee.org/ontology/DOID?iri=http://purl.obolibrary.org/obo/DOID_2234	2	57	0.860203	0.879135	CASP3;DAPK1
DOID:4251	conjunctival disease	http://www.ontobee.org/ontology/DOID?iri=http://purl.obolibrary.org/obo/DOID_4251	1	33	0.867594	0.885842	TP53
DOID:11984	hypertrophic cardiomyopathy	http://www.ontobee.org/ontology/DOID?iri=http://purl.obolibrary.org/obo/DOID_11984	2	60	0.878983	0.896613	IGF1R;MYH7
DOID:2237	hepatitis	http://www.ontobee.org/ontology/DOID?iri=http://purl.obolibrary.org/obo/DOID_2237	18	384	0.882508	0.89935	ADIPOR2;BCL2;CCL21;CDKN1A;DNAJB1;FAS;FASLG;IL10;IL18;IRS2;KCTD9;KRAS;MIF;RB1;SOCS1;THBS1;TNFRSF1B;TP53
DOID:2030	anxiety disorder	http://www.ontobee.org/ontology/DOID?iri=http://purl.obolibrary.org/obo/DOID_2030	2	62	0.890181	0.906305	GABRA6;IL10
DOID:1024	leprosy	http://www.ontobee.org/ontology/DOID?iri=http://purl.obolibrary.org/obo/DOID_1024	1	37	0.896452	0.910952	IL10
DOID:437	myasthenia gravis	http://www.ontobee.org/ontology/DOID?iri=http://purl.obolibrary.org/obo/DOID_437	1	37	0.896452	0.910952	IL10
DOID:3146	lipid metabolism disorder	http://www.ontobee.org/ontology/DOID?iri=http://purl.obolibrary.org/obo/DOID_3146	3	88	0.901176	0.913749	IL10;PAPPA;SCD
DOID:1596	mental depression	http://www.ontobee.org/ontology/DOID?iri=http://purl.obolibrary.org/obo/DOID_1596	1	38	0.902626	0.913749	IGF1R
DOID:3973	thyroid medullary carcinoma	http://www.ontobee.org/ontology/DOID?iri=http://purl.obolibrary.org/obo/DOID_3973	1	38	0.902626	0.913749	CCND1
DOID:439	neuromuscular junction disease	http://www.ontobee.org/ontology/DOID?iri=http://purl.obolibrary.org/obo/DOID_439	1	38	0.902626	0.913749	IL10
DOID:10871	age related macular degeneration	http://www.ontobee.org/ontology/DOID?iri=http://purl.obolibrary.org/obo/DOID_10871	2	65	0.90519	0.91461	ELOVL4;FBLN5
DOID:2007	degeneration of macula and posterior pole	http://www.ontobee.org/ontology/DOID?iri=http://purl.obolibrary.org/obo/DOID_2007	2	65	0.90519	0.91461	ELOVL4;FBLN5
DOID:10241	thalassemia	http://www.ontobee.org/ontology/DOID?iri=http://purl.obolibrary.org/obo/DOID_10241	1	39	0.908434	0.91702	COL1A1
DOID:4448	macular degeneration	http://www.ontobee.org/ontology/DOID?iri=http://purl.obolibrary.org/obo/DOID_4448	2	67	0.914109	0.921877	ELOVL4;FBLN5
DOID:767	muscular atrophy	http://www.ontobee.org/ontology/DOID?iri=http://purl.obolibrary.org/obo/DOID_767	1	42	0.923864	0.930837	SYNCRIP
DOID:0080008	ischemic bone disease	http://www.ontobee.org/ontology/DOID?iri=http://purl.obolibrary.org/obo/DOID_0080008	1	43	0.928408	0.933653	TP53
DOID:3480	uveal disease	http://www.ontobee.org/ontology/DOID?iri=http://purl.obolibrary.org/obo/DOID_3480	1	43	0.928408	0.933653	FAS
DOID:12858	Huntington's disease	http://www.ontobee.org/ontology/DOID?iri=http://purl.obolibrary.org/obo/DOID_12858	1	46	0.94048	0.944903	KPNA1
DOID:110	lens disease	http://www.ontobee.org/ontology/DOID?iri=http://purl.obolibrary.org/obo/DOID_110	1	50	0.953477	0.956163	BCL2
DOID:83	cataract	http://www.ontobee.org/ontology/DOID?iri=http://purl.obolibrary.org/obo/DOID_83	1	50	0.953477	0.956163	BCL2
DOID:480	movement disease	http://www.ontobee.org/ontology/DOID?iri=http://purl.obolibrary.org/obo/DOID_480	1	70	0.98646	0.988311	TARDBP
DOID:0080015	physical disorder	http://www.ontobee.org/ontology/DOID?iri=http://purl.obolibrary.org/obo/DOID_0080015	2	114	0.992649	0.99358	DYRK1A;POMT1
DOID:4	disease	http://www.ontobee.org/ontology/DOID?iri=http://purl.obolibrary.org/obo/DOID_4	369	6225	1	1	ABCC10;ABCC5;ACSL6;ADAM12;ADAM15;ADAMTS5;ADAMTS8;ADIPOR2;ADRB1;ADRB2;ADRB3;AEN;AFF1;AGAP1;AGER;AHR;AIFM1;AMOT;ANGPTL2;AP1S1;APBA1;ARG2;ARHGEF7;ARID3A;ARID3B;ARL4D;ASAP1;ATF2;ATG16L1;ATP2A2;ATP6V0C;ATXN1;B4GALT5;BACE2;BAG4;BCAT1;BCL2;BCL2L1;BCL7A;BMP5;BRF1;BTG2;BZW1;CACNB4;CAPN3;CASP3;CASP5;CBLL1;CCDC28B;CCL21;CCL7;CCND1;CCR7;CD86;CDC25A;CDCA8;CDH22;CDH5;CDK6;CDKN1A;CDKN2D;CEBPD;CHD7;CHEK2;CHFR;CH…
